# Supplementary material for: Selective construction of polycyclic cyclohepta[b]indoles and cyclopenta[b]indoles via cycloaddition reaction of 3-(indol-3-yl)maleimides and (indol-2-yl)methanols
Source: Royal Society of Chemistry journal article supplement (doi:10.1039/d3nj00013c), 2023-01-01

**Selective Construction of Polycyclic Cyclohepta[*b*]indoles and  
Cyclopenta[*b*]indoles via Cycloaddition Reaction of 3-(Indol-3-yl)maleimides and  
(Indol-2-yl)methanols**

**Jing Sun, Chen Yan, Qiu Sun,\* Ying Han, Chao-Guo Yan\***

**Supporting Information**

|                                                                                      |               |
|--------------------------------------------------------------------------------------|---------------|
| <b>Figures of the Single crystal structures</b>                                      | <b>S2-S3</b>  |
| <b>Single crystal data</b>                                                           | <b>S4-S6</b>  |
| <b>General Procedure for the preparation of the spiro compounds</b>                  | <b>S7</b>     |
| <b><sup>1</sup>H and <sup>13</sup>C {<sup>1</sup>H} NMR spectra of all compounds</b> | <b>S8-S74</b> |

Single crystals were grown by slow evaporation of concentrated solution in  $\text{CHCl}_3$  / DCM / EtOH / DMF / DMSO (compounds **3a**, **3c**, **5c**, **5d**, **5e**, **6k**, **8b**, **8e**, **9a**) in glass vials, which were then sealed by plugs with needles on them.

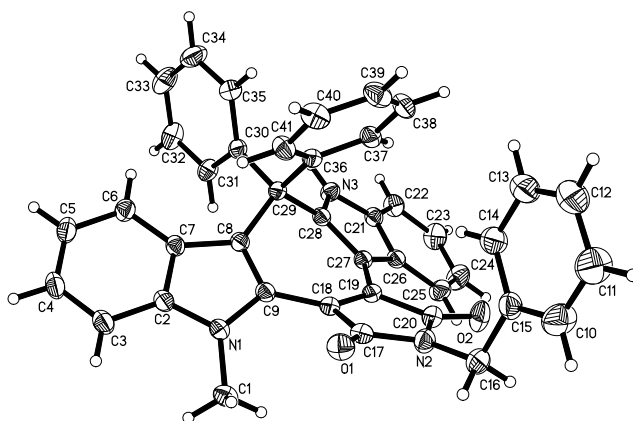

Fig. s1 Single crystal structure of the compound **3c**

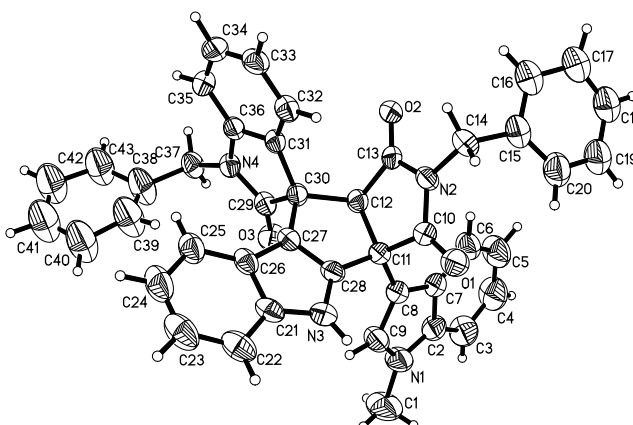

Fig. s2 Single crystal structure of the compound **5d**

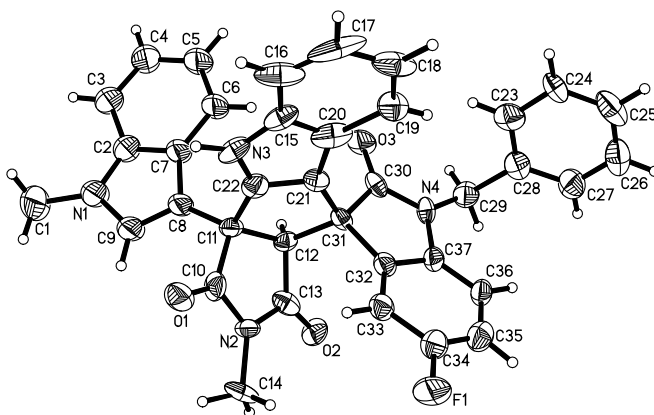

Fig. s3 Single crystal structure of the compound **5e**

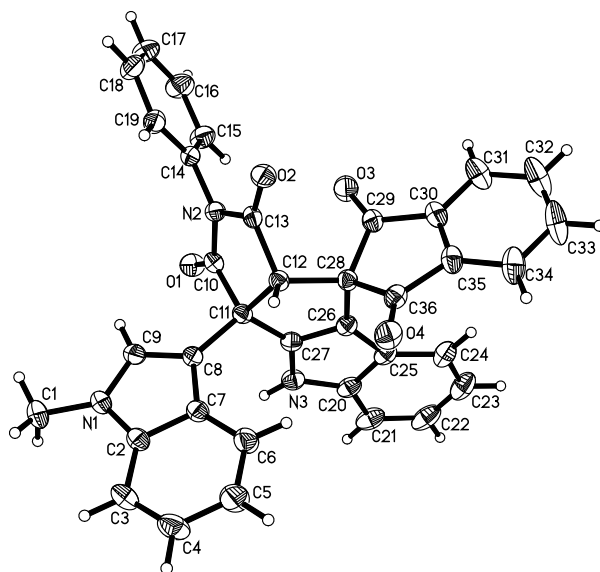

Fig. s5 Single crystal structure of the compound **8b**

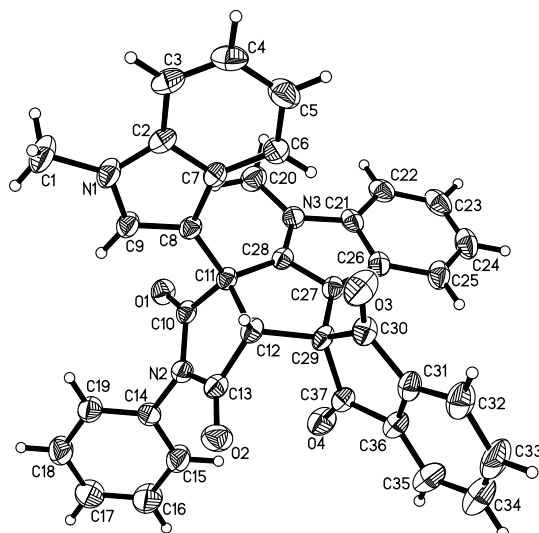

Fig. s6 Single crystal structure of the compound **8e**

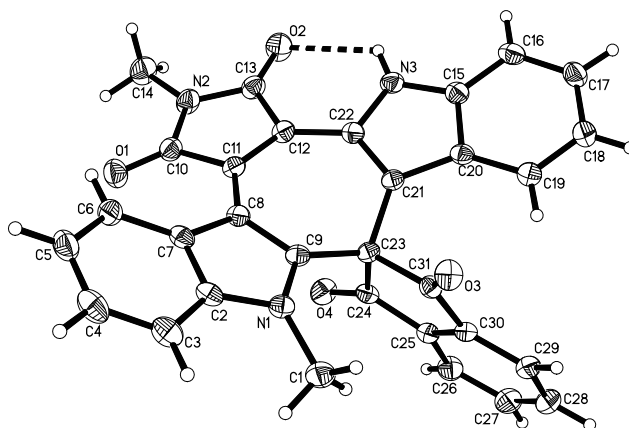

Fig. s7 Single crystal structure of the compound **9a**

**Table S1** The single crystal data of compounds **3a**, **3c**, **5c**

| Phase                                                   | <b>3a</b>                                                                     | <b>3c</b>                                                           | <b>5c</b>                                                          |
|---------------------------------------------------------|-------------------------------------------------------------------------------|---------------------------------------------------------------------|--------------------------------------------------------------------|
| Empirical formula                                       | C <sub>81</sub> H <sub>55</sub> Cl <sub>3</sub> N <sub>6</sub> O <sub>4</sub> | C <sub>41</sub> H <sub>29</sub> N <sub>3</sub> O <sub>2</sub>       | C <sub>37</sub> H <sub>27</sub> FN <sub>4</sub> O <sub>3</sub>     |
| Formula weight                                          | 1282.66                                                                       | 595.67                                                              | 594.62                                                             |
| Temperature/K                                           | 296(2)                                                                        | 296(2)                                                              | 296(2)                                                             |
| Wavelength/ Å                                           | 0.71073                                                                       | 0.71073                                                             | 0.71073                                                            |
| Crystal system                                          | Triclinic                                                                     | Triclinic                                                           | Orthorhombic                                                       |
| Space group                                             | P-1                                                                           | P-1                                                                 | Pca2(1)                                                            |
| <i>a</i> / Å                                            | 13.705(3)                                                                     | 11.3215(4)                                                          | 30.155(3)                                                          |
| <i>b</i> / Å                                            | 13.864(3)                                                                     | 12.4187(5)                                                          | 9.1523(9)                                                          |
| <i>c</i> / Å                                            | 17.875(5)                                                                     | 13.2902(5)                                                          | 25.150(3)                                                          |
| α (°)                                                   | 85.290(7)                                                                     | 114.1368(12)                                                        | 90                                                                 |
| β (°)                                                   | 74.680(7)                                                                     | 110.5982(12)                                                        | 90                                                                 |
| γ (°)                                                   | 82.395(7)                                                                     | 97.3589(13)                                                         | 90                                                                 |
| <i>V</i> (Å <sup>3</sup> )                              | 3242.8(14)                                                                    | 1513.15(10)                                                         | 6941.2(12)                                                         |
| <i>Z</i>                                                | 2                                                                             | 2                                                                   | 8                                                                  |
| Calculated density                                      | 1.314                                                                         | 1.307                                                               | 1.138                                                              |
| Absorption                                              | 0.200                                                                         | 0.081                                                               | 0.077                                                              |
| <i>F</i> (000)                                          | 1332                                                                          | 624                                                                 | 2480                                                               |
| θ range / (°)                                           | 2.019 to 24.998                                                               | 2.293 to 25.998                                                     | 2.326 to 24.997                                                    |
| Limiting indices                                        | -16 ≤ <i>h</i> ≤ 16,<br>-16 ≤ <i>k</i> ≤ 16,<br>-20 ≤ <i>l</i> ≤ 21           | -13 ≤ <i>h</i> ≤ 13,<br>-15 ≤ <i>k</i> ≤ 15,<br>-16 ≤ <i>l</i> ≤ 16 | -35 ≤ <i>h</i> ≤ 33,<br>-10 ≤ <i>k</i> ≤ 9,<br>-29 ≤ <i>l</i> ≤ 29 |
| Reflections<br>collected/unique                         | 42255 / 11395<br>[ <i>R</i> (int) = 0.2825]                                   | 21473/5890<br>[ <i>R</i> (int) = 0.0299]                            | 67793 / 12103<br>[ <i>R</i> (int) = 0.1808]                        |
| Completeness to theta                                   | 99.7 %                                                                        | 99.0 %                                                              | 99.9 %                                                             |
| Max. and min.                                           | 0.7456 and 0.4103                                                             | 0.7455 and 0.7077                                                   | 0.7456 and 0.6541                                                  |
| Refinement method                                       | Full-matrix<br>least-squares on<br><i>F</i> <sup>2</sup>                      | Full-matrix<br>least-squares on<br><i>F</i> <sup>2</sup>            | Full-matrix<br>least-squares on<br><i>F</i> <sup>2</sup>           |
| Data/restraints/paramet                                 | 11395 / 0 / 850                                                               | 5890/174/462                                                        | 12103 / 213 / 816                                                  |
| Goodness-of-fit on <i>F</i> <sup>2</sup>                | 0.906                                                                         | 1.027                                                               | 0.958                                                              |
| Final <i>R</i><br>indices [ <i>I</i> > 2σ( <i>I</i> )]  | <i>R</i> 1 = 0.1218,<br><i>wR</i> 2 = 0.2426                                  | <i>R</i> 1 = 0.0456,<br><i>wR</i> 2 = 0.1072                        | <i>R</i> 1 = 0.1035,<br><i>wR</i> 2 = 0.2609                       |
| <i>R</i> indices (all data)                             | <i>R</i> 1 = 0.3352,<br><i>wR</i> 2 = 0.2998                                  | <i>R</i> 1 = 0.0676,<br><i>wR</i> 2 = 0.1192                        | <i>R</i> 1 = 0.2335,<br><i>wR</i> 2 = 0.3010                       |
| Largest diff. peak and<br>hole / (e · Å <sup>-3</sup> ) | 0.518 and -0.491                                                              | 0.208 and -0.283                                                    | 0.734 and -0.363                                                   |



**Table S2** The single crystal data of compounds **5d**, **5e**, **6k**

| Phase                                                   | <b>5d</b>                                                                     | <b>5e</b>                                                           | <b>6k</b>                                                           |
|---------------------------------------------------------|-------------------------------------------------------------------------------|---------------------------------------------------------------------|---------------------------------------------------------------------|
| Empirical formula                                       | C <sub>36</sub> H <sub>33</sub> Cl <sub>3</sub> N <sub>4</sub> O <sub>3</sub> | C <sub>43</sub> H <sub>32</sub> N <sub>4</sub> O <sub>3</sub>       | C <sub>43</sub> H <sub>41</sub> N <sub>5</sub> O <sub>4</sub>       |
| Formula weight                                          | 676.01                                                                        | 652.72                                                              | 691.81                                                              |
| Temperature/K                                           | 296(2)                                                                        | 296(2)                                                              | 296(2)                                                              |
| Wavelength/ Å                                           | 0.71073                                                                       | 0.71073                                                             | 0.71073                                                             |
| Crystal system                                          | Monoclinic                                                                    | Monoclinic                                                          | Triclinic                                                           |
| Space group                                             | P2(1)/n                                                                       | C2/c                                                                | P-1                                                                 |
| <i>a</i> / Å                                            | 17.200(4)                                                                     | 29.965(6)                                                           | 11.3858(5)                                                          |
| <i>b</i> / Å                                            | 9.5522(19)                                                                    | 10.1561(19)                                                         | 11.7752(5)                                                          |
| <i>c</i> / Å                                            | 22.075(5)                                                                     | 27.430(6)                                                           | 15.6044(7)                                                          |
| $\alpha$ (°)                                            | 90                                                                            | 90                                                                  | 77.5323(13)                                                         |
| $\beta$ (°)                                             | 110.167(7)                                                                    | 101.793(6)                                                          | 83.5022(14)                                                         |
| $\gamma$ (°)                                            | 90                                                                            | 90                                                                  | 66.2724(12)                                                         |
| <i>V</i> (Å <sup>3</sup> )                              | 3404.6(13)                                                                    | 8171(3)                                                             | 1869.26(14)                                                         |
| <i>Z</i>                                                | 4                                                                             | 8                                                                   | 2                                                                   |
| Calculated density                                      | 1.319                                                                         | 1.061                                                               | 1.229                                                               |
| Absorption                                              | 0.311                                                                         | 0.068                                                               | 0.080                                                               |
| <i>F</i> (000)                                          | 1408                                                                          | 2736                                                                | 732                                                                 |
| $\theta$ range / (°)                                    | 1.847 to 25.000                                                               | 2.122 to 24.998                                                     | 1.337 to 26.000                                                     |
| Limiting indices                                        | -20 ≤ <i>h</i> ≤ 20,<br>-11 ≤ <i>k</i> ≤ 11,<br>-26 ≤ <i>l</i> ≤ 23           | -35 ≤ <i>h</i> ≤ 32,<br>-11 ≤ <i>k</i> ≤ 12,<br>-32 ≤ <i>l</i> ≤ 32 | -14 ≤ <i>h</i> ≤ 13,<br>-14 ≤ <i>k</i> ≤ 14,<br>-19 ≤ <i>l</i> ≤ 19 |
| Reflections<br>collected/unique                         | 26286/6002<br>[R(int) = 0.0563]                                               | 34118/7151<br>[R(int) = 0.0533]                                     | 26708/7294<br>[R(int) = 0.0386]                                     |
| Completeness to theta                                   | 99.7 %                                                                        | 99.4 %                                                              | 99.2 %                                                              |
| Max. and min.                                           | 0.7456 and 0.6494                                                             | 0.7456 and 0.6580                                                   | 0.7456 and 0.7125                                                   |
| Refinement method                                       | Full-matrix<br>least-squares on<br>F <sup>2</sup>                             | Full-matrix<br>least-squares on F <sup>2</sup>                      | Full-matrix<br>least-squares on<br>F <sup>2</sup>                   |
| Data/restraints/paramet                                 | 6002/23/419                                                                   | 7151/246/499                                                        | 7294/0/474                                                          |
| Goodness-of-fit on <i>F</i> <sup>2</sup>                | 1.065                                                                         | 0.980                                                               | 1.018                                                               |
| Final <i>R</i><br>indices [I > 2σ(I)]                   | R1 = 0.1006,<br>wR2 = 0.3019                                                  | R1 = 0.1073,<br>wR2 = 0.3132                                        | R1 = 0.0569,<br>wR2 = 0.1353                                        |
| <i>R</i> indices (all data)                             | R1 = 0.1592,<br>wR2 = 0.3344                                                  | R1 = 0.1579,<br>wR2 = 0.3406                                        | R1 = 0.0934,<br>wR2 = 0.1567                                        |
| Largest diff. peak and<br>hole / (e · Å <sup>-3</sup> ) | 0.412 and -0.779                                                              | 0.942 and -0.495                                                    | 0.481 and -0.292                                                    |

**Table S3** The single crystal data of compounds **8b**, **8e**, **9a**

| Phase                                                      | <b>8b</b>                                                           | <b>8e</b>                                                           | <b>9a</b>                                                                     |
|------------------------------------------------------------|---------------------------------------------------------------------|---------------------------------------------------------------------|-------------------------------------------------------------------------------|
| Empirical formula                                          | C <sub>39</sub> H <sub>30</sub> N <sub>4</sub> O <sub>5</sub>       | C <sub>37</sub> H <sub>25</sub> N <sub>3</sub> O <sub>4</sub>       | C <sub>31</sub> H <sub>20</sub> Cl <sub>3</sub> N <sub>3</sub> O <sub>4</sub> |
| Formula weight                                             | 634.67                                                              | 575.60                                                              | 616.86                                                                        |
| Temperature/K                                              | 296(2)                                                              | 296(2)                                                              | 296(2)                                                                        |
| Wavelength/ Å                                              | 0.71073                                                             | 0.71073                                                             | 0.71073                                                                       |
| Crystal system                                             | Triclinic                                                           | Triclinic                                                           | Triclinic                                                                     |
| Space group                                                | P-1                                                                 | P-1                                                                 | P-1                                                                           |
| <i>a</i> / Å                                               | 10.131(2)                                                           | 12.284(3)                                                           | 12.0107(18)                                                                   |
| <i>b</i> / Å                                               | 11.507(3)                                                           | 12.500(3)                                                           | 12.0920(19)                                                                   |
| <i>c</i> / Å                                               | 15.601(4)                                                           | 15.924(3)                                                           | 12.2492(18)                                                                   |
| $\alpha$ (°)                                               | 72.289(7)                                                           | 74.639(7)                                                           | 118.132(4)                                                                    |
| $\beta$ (°)                                                | 86.070(8)                                                           | 86.466(7)                                                           | 96.981(4)                                                                     |
| $\gamma$ (°)                                               | 68.259(7)                                                           | 65.105(6)                                                           | 111.445(4)                                                                    |
| <i>V</i> (Å <sup>3</sup> )                                 | 1607.3(7)                                                           | 2135.3(8)                                                           | 1363.4(4)                                                                     |
| <i>Z</i>                                                   | 2                                                                   | 2                                                                   | 2                                                                             |
| Calculated density (g·cm <sup>-3</sup> )                   | 1.311                                                               | 0.895                                                               | 1.503                                                                         |
| Absorption coefficient(mm <sup>-1</sup> )                  | 0.088                                                               | 0.059                                                               | 0.382                                                                         |
| <i>F</i> (000)                                             | 664                                                                 | 600                                                                 | 632                                                                           |
| $\theta$ range / (°)                                       | 2.167 to 25.997                                                     | 1.862 to 25.999                                                     | 1.951 to 25.997                                                               |
| Limiting indices                                           | -12<= <i>h</i> <=12,<br>-14<= <i>k</i> <=14,<br>-19<= <i>l</i> <=19 | -15<= <i>h</i> <=15,<br>-14<= <i>k</i> <=15,<br>-19<= <i>l</i> <=19 | -14<= <i>h</i> <=14,<br>-14<= <i>k</i> <=14,<br>-14<= <i>l</i> <=15           |
| Reflections collected/unique                               | 22885/6284                                                          | 30584/8361                                                          | 15501/5270                                                                    |
| Completeness to theta                                      | [ <i>R</i> (int) = 0.0342]                                          | [ <i>R</i> (int) = 0.0569]                                          | [ <i>R</i> (int) = 0.0402]                                                    |
| Max. and min. transmission                                 | 99.6 %                                                              | 99.7 %                                                              | 98.1 %                                                                        |
| Refinement method                                          | Full-matrix least-squares on <i>F</i> <sup>2</sup>                  | Full-matrix least-squares on <i>F</i> <sup>2</sup>                  | Full-matrix least-squares on <i>F</i> <sup>2</sup>                            |
| Data/restraints/parameters                                 | 6284/0/436                                                          | 8361/0/399                                                          | 5270/0/381                                                                    |
| Goodness-of-fit on <i>F</i> <sup>2</sup>                   | 1.020                                                               | 1.048                                                               | 1.052                                                                         |
| Final <i>R</i> indices[ <i>I</i> >2 $\sigma$ ( <i>I</i> )] | <i>R</i> 1 = 0.0542,<br><i>wR</i> 2 = 0.1306                        | <i>R</i> 1 = 0.0684,<br><i>wR</i> 2 = 0.1902                        | <i>R</i> 1 = 0.0844,<br><i>wR</i> 2 = 0.2283                                  |
| <i>R</i> indices (all data)                                | <i>R</i> 1 = 0.0882,<br><i>wR</i> 2 = 0.1502                        | <i>R</i> 1 = 0.1274,<br><i>wR</i> 2 = 0.2192                        | <i>R</i> 1 = 0.1165,<br><i>wR</i> 2 = 0.2536                                  |
| Largest diff. peak and hole / (e · Å <sup>-3</sup> )       | 0.284 and -0.301                                                    | 0.261 and -0.239                                                    | 0.796 and -0.863                                                              |

## Experimental section

### 1. General procedure for the preparation of the compound 3a-3k

To a round flask was added 3-(indol-3-yl)maleimides (1.0 mmol), (indol-2-yl)diphenylmethanol (1.0 mmol), chloroform (8.0 mL) and *p*-toluenesulfonic acid monohydrate (0.3 mmol). The mixture was heated at 65 °C for four hours. After removing the solvent at reduced pressure by rotation evaporation, the residue was subjected to column chromatography with petroleum ether and ethyl acetate (V/V = 10:1) as eluent to give the pure product for analysis.

### 2. General procedure for the preparation of the compound 5a-5k and 6e-6h

To a round flask was added 3-(indol-3-yl)maleimides (1.0 mmol), 3-hydroxy-3-(indol-3-yl)-indolin-2-one (1.0 mmol), acetonitrile (8.0 mL) and *p*-toluenesulfonic acid monohydrate (0.3 mmol). The mixture was heated at 60 °C for six hours. After removing the solvent at reduced pressure by rotation evaporation, the residue was subjected to column chromatography with petroleum ether and methylene dichloride (V/V = 4:1) as eluent to give the pure product for analysis.

### 3. General procedure for the preparation of the compound 8a-8f and 9a-9c

To a round flask was added 3-(indol-3-yl)maleimides (1.0 mmol), 2-hydroxy-2-(indol-3-yl)-indene-1,3-dione (1.0 mmol), acetonitrile (8.0 mL) and *p*-toluenesulfonic acid monohydrate (0.3 mmol). The mixture was heated at 60 °C for six hours. After removing the solvent at reduced pressure by rotation evaporation, the residue was subjected to column chromatography with petroleum ether and methylene dichloride (V/V = 4:1) as eluent to give the pure product for analysis.

**14-methyl-2,9,9-triphenyl-9,14-dihydropyrrolo[3',4':6,7]cyclohepta[1,2-*b*:4,5-*b'*]diindole-**

**1,3(2*H*,8*H*)-dione (3a):** petroleum ether and ethyl acetate (V/V = 10:1) as the eluent, red solid, 394 mg, red solid, 76%, m.p. 235-237 °C; <sup>1</sup>H NMR (400 MHz, CDCl<sub>3</sub>) δ: 8.36-8.33 (m, 2H, ArH), 7.88 (d, *J* = 6.4 Hz, 1H, ArH), 7.57-7.51 (m, 2H, ArH), 7.45 (t, *J* = 6.0 Hz, 3H, ArH), 7.40-7.22 (m, 8H, ArH), 7.10-7.05 (m, 3H, ArH), 6.80-6.74 (m, 2H, ArH), 6.68 (d, *J* = 7.2 Hz, 1H, ArH), 6.50 (d, *J* = 6.0 Hz, 1H, ArH), 5.65 (d, *J* = 8.0 Hz, 1H, ArH), 3.89 (s, 3H, CH<sub>3</sub>); <sup>13</sup>C NMR (100 MHz, CDCl<sub>3</sub>) δ: 168.4, 167.9, 147.1, 143.0, 142.6, 141.4, 134.8, 133.1, 132.7, 131.8, 130.0, 129.9, 129.2, 129.1, 128.9, 128.8, 128.7, 128.6, 128.3, 128.2, 127.7, 127.6, 127.4, 126.9, 126.8, 126.3, 125.7, 123.7, 123.6, 123.0, 122.0, 121.9, 121.3, 119.7, 111.3, 110.2, 106.8, 56.2, 34.1; IR (KBr) ν: 3048, 2911, 2852, 2321, 1890, 1756, 1732, 1628, 1518, 1475, 1448, 1371, 1221, 910, 834, 756 cm<sup>-1</sup>; MS (*m/z*): HRMS (ESI-TOF) Calcd. for C<sub>40</sub>H<sub>27</sub>NaN<sub>3</sub>O<sub>2</sub> ([M+Na]<sup>+</sup>): 604.1995, Found: 604.1987.

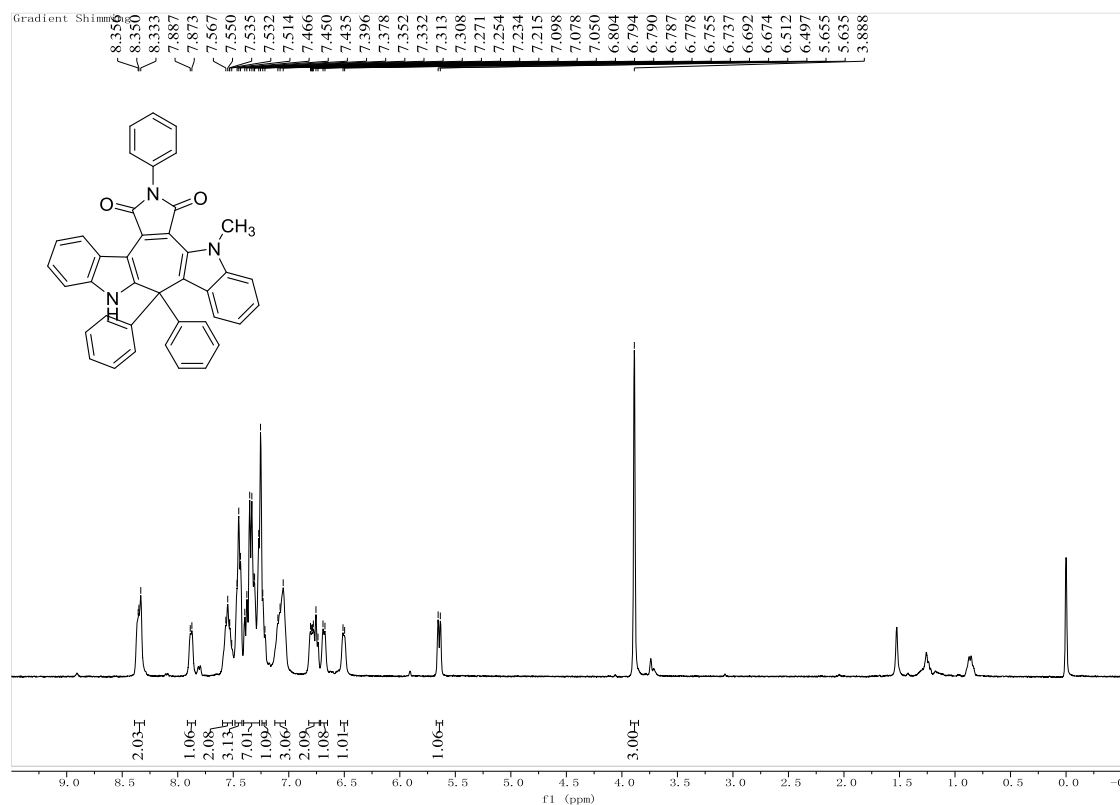

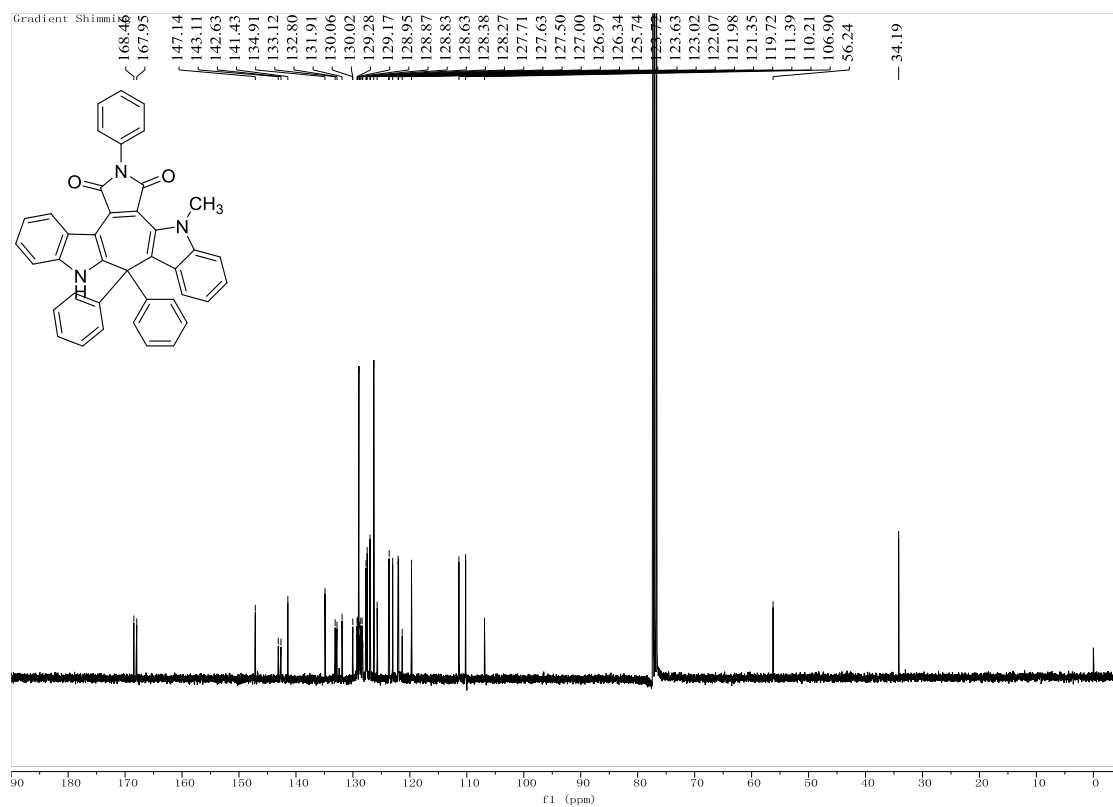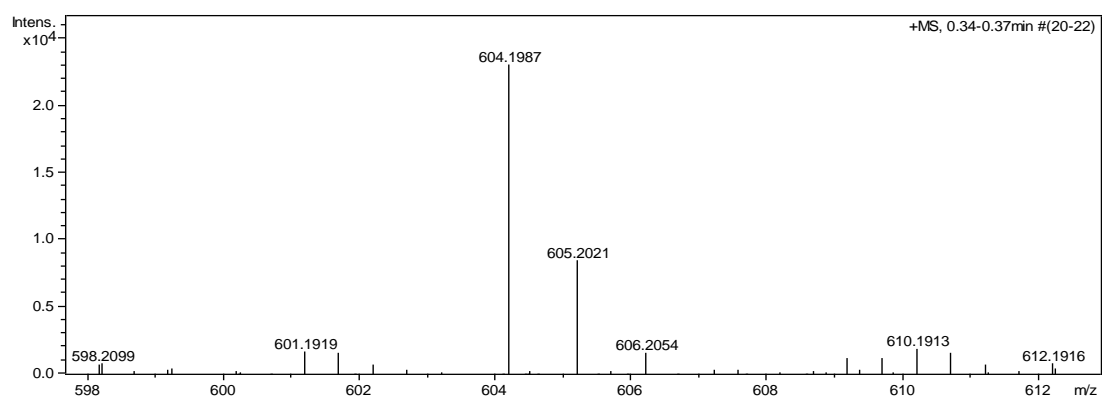

**2,14-dimethyl-9,9-diphenyl-9,14-dihydropyrrolo[3',4':6,7]cyclohepta[1,2-b:4,5-b']diindole-**

**1,3(2*H*,8*H*)-dione (3b):** petroleum ether and ethyl acetate (V/V = 10:1) as the eluent, red solid, 453 mg, red solid, 78%, m.p. 244-246 °C; <sup>1</sup>H NMR (400 MHz, CDCl<sub>3</sub>) δ: 8.34 (d, J = 6.8 Hz, 1H, ArH), 8.24 (s, 1H, NH), 7.82 (d, J = 6.8 Hz, 1H, ArH), 7.55-7.49 (m, 2H, ArH), 7.44-7.41 (m, 1H, ArH), 7.37 (d, J = 8.0 Hz, 1H, ArH), 7.30-7.27 (m, 2H, ArH), 7.23-7.19 (m, 2H, ArH), 7.09-7.03 (m, 3H, ArH), 6.79-6.71 (m, 2H, ArH), 6.62 (d, J = 6.8 Hz, 1H, ArH), 6.47 (d, J = 6.4 Hz, 1H, ArH), 5.61 (d, J = 8.4 Hz, 1H, ArH), 3.85 (s, 3H, CH<sub>3</sub>), 3.05 (s, 3H, CH<sub>3</sub>); <sup>13</sup>C NMR (100 MHz, CDCl<sub>3</sub>) δ: 169.7, 169.3, 146.2, 143.2, 142.9, 141.4, 134.8, 133.1, 132.9, 129.8, 129.4, 129.3, 129.1, 128.6, 128.5, 128.4, 128.3, 127.7, 127.5, 127.0, 126.8, 126.7, 126.1, 125.6, 123.6, 123.5, 122.8, 122.0, 121.8, 121.5, 119.6, 111.3, 110.1, 106.9, 56.2, 34.1, 24.0; IR (KBr) ν: 3052, 2924, 2862, 2366, 1881, 1770, 1712, 1601, 1542, 1450, 1371, 1244, 1188, 998, 820, 734 cm<sup>-1</sup>; MS (*m/z*): HRMS (ESI-TOF) Calcd. for C<sub>35</sub>H<sub>25</sub>NaN<sub>3</sub>O<sub>2</sub> ([M+Na]<sup>+</sup>): 542.1839, Found: 542.1837.

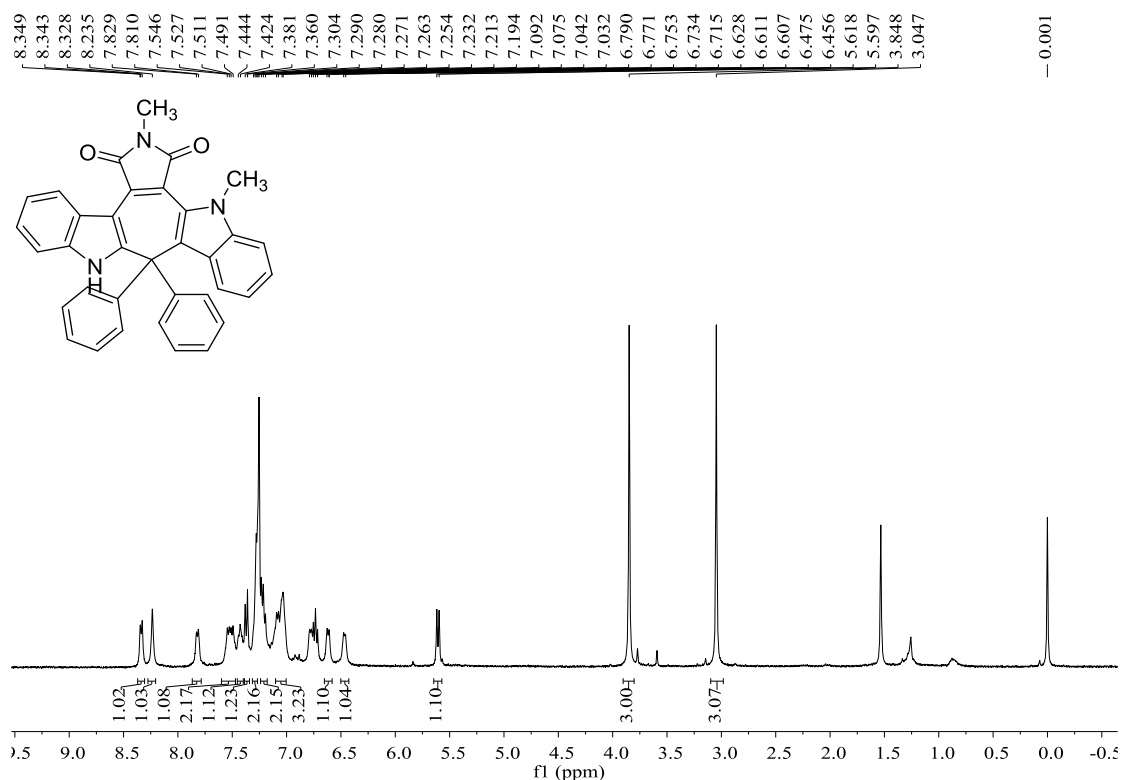

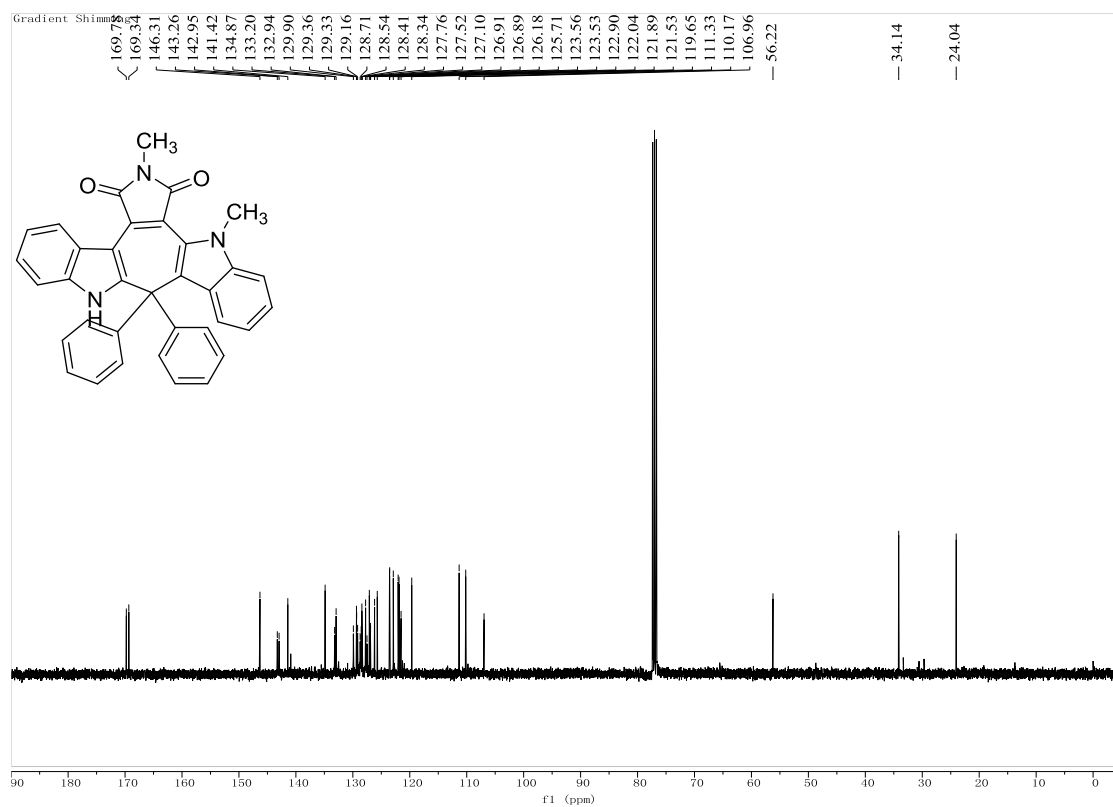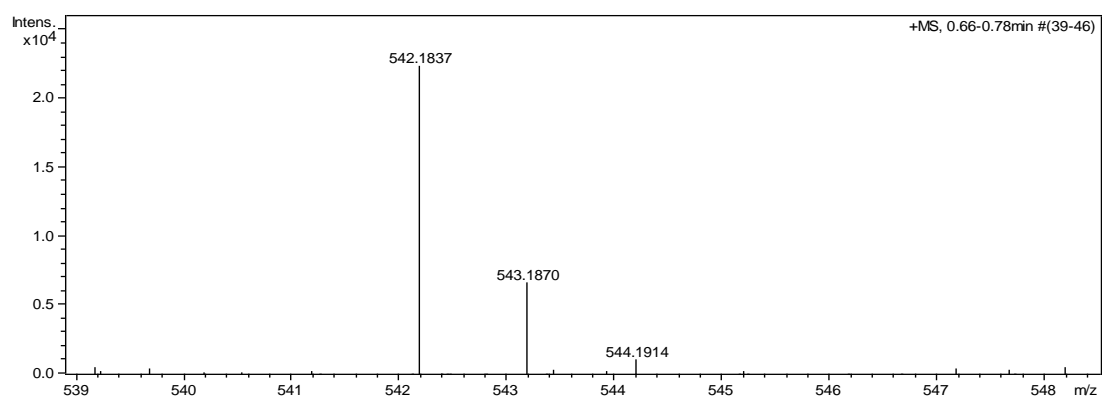

**2-benzyl-14-methyl-9,9-diphenyl-9,14-dihydropyrrolo[3',4':6,7]cyclohepta[1,2-*b*:4,5-*b'*]diindole-1,3(2*H*,8*H*)-dione (3c)**: petroleum ether and ethyl acetate (V/V = 10:1) as the eluent, red solid, 464 mg, red solid, 78%, m.p. 212-215 °C; <sup>1</sup>H NMR (400 MHz, CDCl<sub>3</sub>) δ: 8.31-8.29 (m, 2H, ArH), 7.88 (d, *J* = 6.8 Hz, 1H, ArH), 7.56-7.51 (m, 2H, ArH), 7.43 (t, *J* = 6.8 Hz, 3H, ArH), 7.37 (d, *J* = 8.0 Hz, 1H, ArH), 7.28-7.19 (m, 7H, ArH), 7.07-6.99 (m, 5H, ArH), 6.74 (t, *J* = 7.2 Hz, 2H, ArH), 6.67 (d, *J* = 7.2 Hz, 1H, ArH), 6.45 (d, *J* = 6.8 Hz, 1H, ArH), 5.62 (d, *J* = 8.4 Hz, 1H, ArH), 4.73 (s, 2H, CH), 3.85 (s, 3H, CH<sub>3</sub>); <sup>13</sup>C NMR (100 MHz, CDCl<sub>3</sub>) δ: 169.3, 168.8, 146.8, 143.1, 142.5, 141.2, 136.5, 134.8, 133.1, 133.0, 129.9, 129.3, 129.2, 128.7, 128.5, 128.5, 128.3, 127.6, 127.5, 127.2, 126.9, 126.7, 126.5, 125.6, 123.5, 122.7, 121.9, 121.6, 119.6, 111.3, 110.1, 106.9, 56.1, 41.3, 33.9; IR (KBr) ν: 3032, 2956, 2878, 2334, 1876, 1765, 1730, 1589, 1521, 1476, 1325, 1230, 1180, 920, 856, 774 cm<sup>-1</sup>; MS (*m/z*): HRMS (ESI-TOF) Calcd. for C<sub>41</sub>H<sub>29</sub>NaN<sub>3</sub>O<sub>2</sub> ([M+Na]<sup>+</sup>): 618.2152, Found: 618.2145.

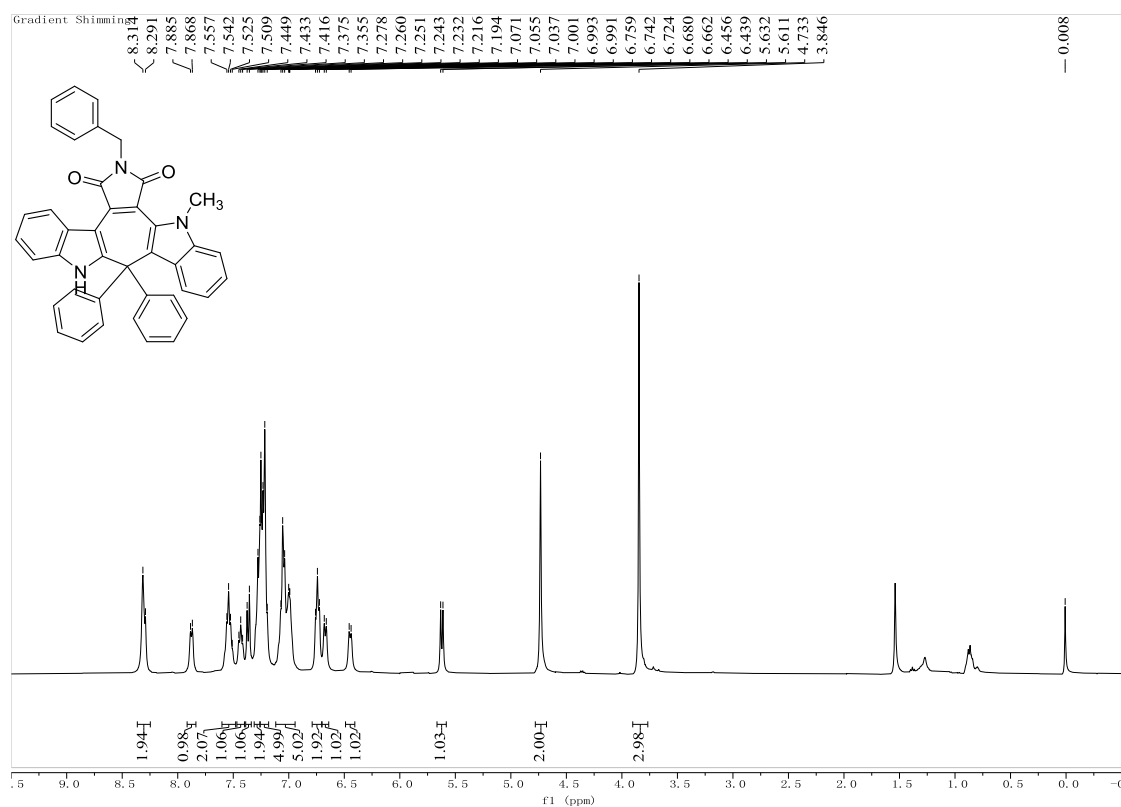



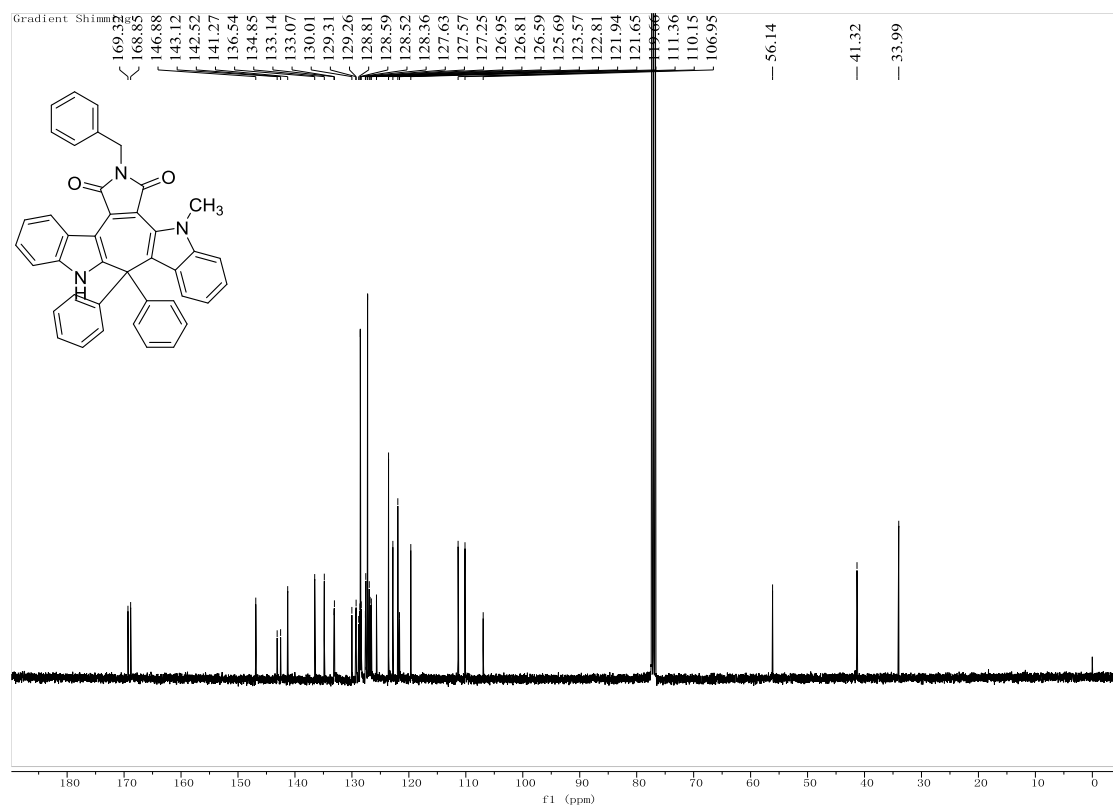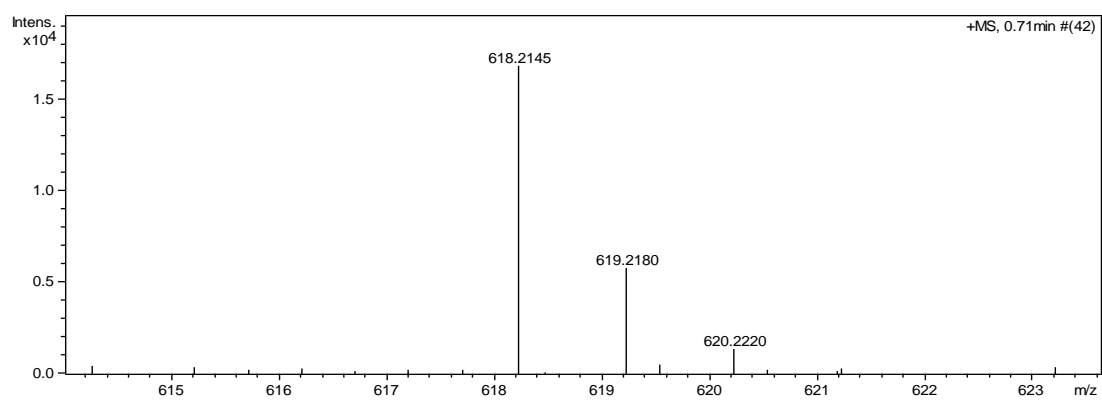

**2,14-dimethyl-9,9-di-p-tolyl-9,14-dihydropyrrolo[3',4':6,7]cyclohepta[1,2-*b*:4,5-*b'*]diindole-1,3(2*H*,8*H*)-dione (3d):** petroleum ether and ethyl acetate (V/V = 10:1) as the eluent, red solid, 405 mg, red solid, 74%, m.p. 233-236 °C; <sup>1</sup>H NMR (400 MHz, CDCl<sub>3</sub>) δ: 8.33 (d, *J* = 6.8 Hz, 1H, ArH), 8.25 (s, 1H, NH), 7.65 (d, *J* = 7.6 Hz, 1H, ArH), 7.36 (d, *J* = 8.4 Hz, 1H, ArH), 7.29-7.19 (m, 6H, ArH), 6.81 (d, *J* = 4.8 Hz, 2H, ArH), 6.75 (t, *J* = 7.6 Hz, 1H, ArH), 6.64 (d, *J* = 6.4 Hz, 1H, ArH), 6.32 (d, *J* = 6.4 Hz, 1H, ArH), 5.70 (d, *J* = 8.0 Hz, 1H, ArH), 3.84 (s, 3H, CH<sub>3</sub>), 3.06 (s, 3H, CH<sub>3</sub>), 2.50 (s, 3H, CH<sub>3</sub>), 2.20 (s, 3H, CH<sub>3</sub>); <sup>13</sup>C NMR (100 MHz, CDCl<sub>3</sub>) δ: 169.8, 169.4, 146.7, 141.4, 140.3, 140.1, 138.2, 136.2, 134.8, 132.9, 129.8, 129.5, 129.2, 129.1, 128.5, 128.4, 128.4, 128.3, 127.3, 127.1, 126.3, 125.7, 123.4, 123.3, 122.8, 122.2, 121.7, 121.4, 119.5, 111.2, 110.0, 106.7, 55.5, 34.1, 24.0, 21.2, 20.9; IR (KBr) ν: 3078, 2934, 2852, 2735, 2545, 2356, 1887, 1775, 1721, 1632, 1534, 1445, 1356, 1265, 1156, 912, 820, 721 cm<sup>-1</sup>; MS (*m/z*): HRMS (ESI-TOF) Calcd. for C<sub>37</sub>H<sub>29</sub>NaN<sub>3</sub>O<sub>2</sub> ([M+Na]<sup>+</sup>): 570.2152, Found: 570.2145.

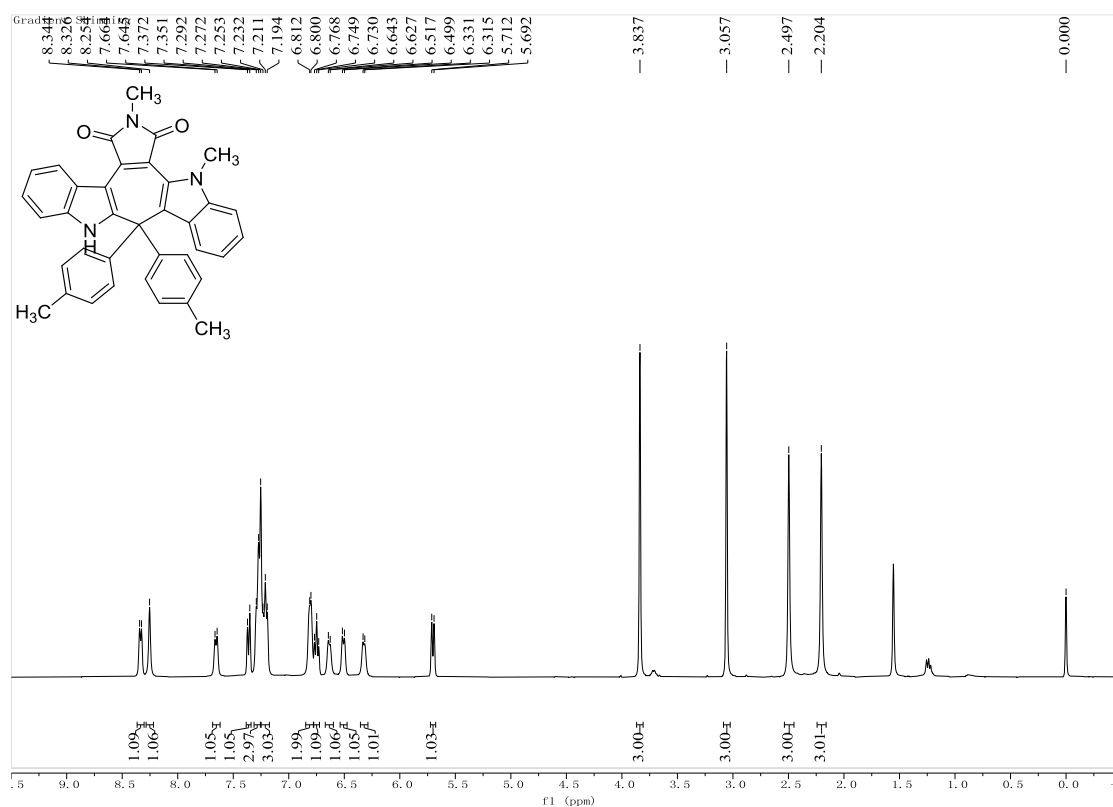

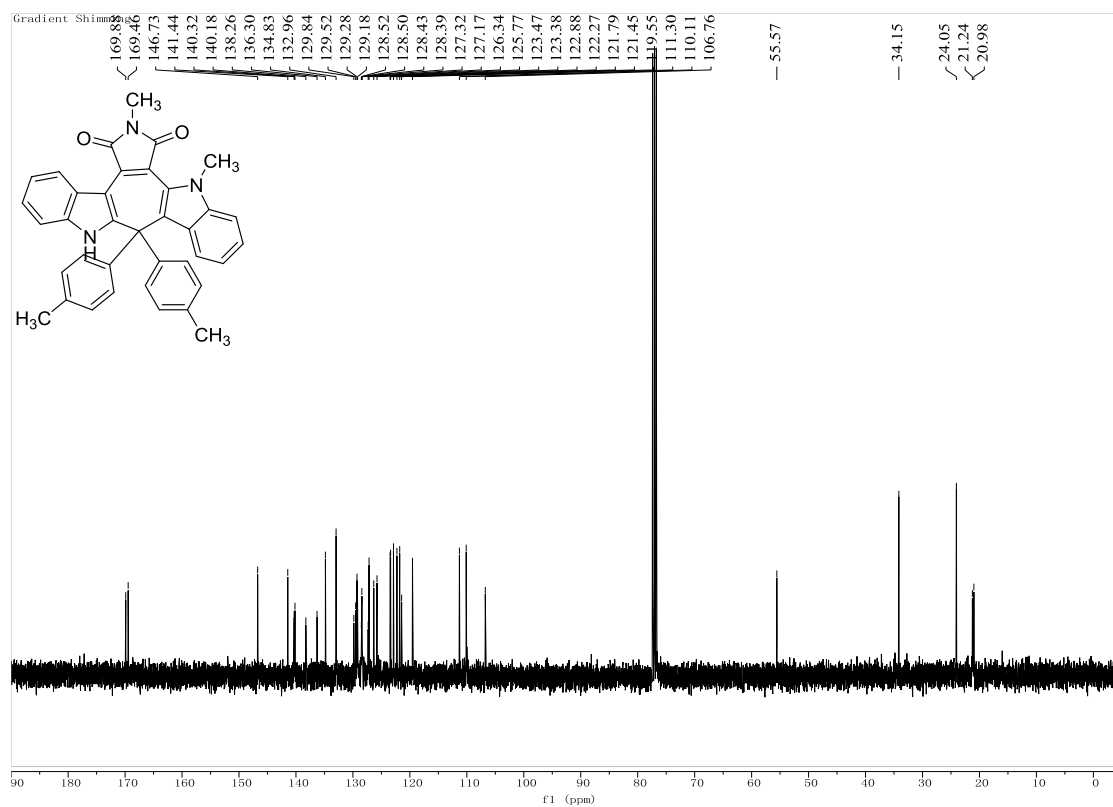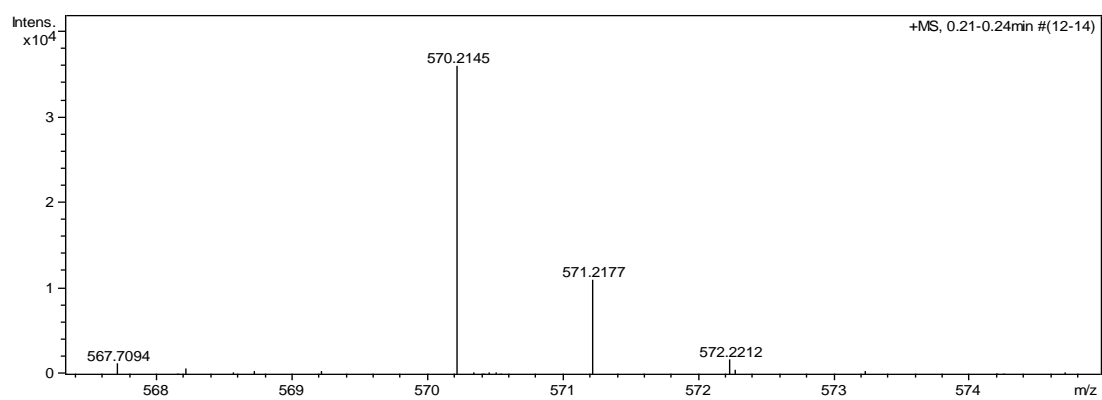

**14-methyl-2-phenyl-9,9-di-p-tolyl-9,14-dihydropyrrolo[3',4':6,7]cyclohepta[1,2-b:4,5-**

**b']diindole-1,3(2H,8H)-dione (3e):** petroleum ether and ethyl acetate (V/V = 10:1) as the eluent, red solid, 439 mg, red solid, 72%, m.p. 208-211 °C; <sup>1</sup>H NMR (400 MHz, CDCl<sub>3</sub>) δ: 8.37-8.34 (m, 2H, ArH), 7.72 (d, *J* = 7.6 Hz, 1H, ArH), 7.46 (t, *J* = 7.6 Hz, 2H, ArH), 7.38-7.22 (m, 10H, ArH), 6.83 (d, *J* = 6.0 Hz, 2H, ArH), 6.77 (t, *J* = 8.0 Hz, 1H, ArH), 6.66 (d, *J* = 7.6 Hz, 1H, ArH), 6.58 (d, *J* = 8.0 Hz, 1H, ArH), 6.36 (d, *J* = 6.0 Hz, 1H, ArH), 5.75 (d, *J* = 8.4 Hz, 1H, ArH), 3.88 (s, 3H, CH<sub>3</sub>), 2.52 (s, 3H, CH<sub>3</sub>), 2.21 (s, 3H, CH<sub>3</sub>); <sup>13</sup>C NMR (100 MHz, CDCl<sub>3</sub>) δ: 168.4, 167.9, 147.5, 141.4, 140.1, 139.7, 138.3, 136.3, 134.8, 132.7, 131.9, 129.6, 129.1, 129.0, 128.9, 128.6, 128.3, 128.2, 127.3, 127.1, 127.0, 126.2, 125.7, 123.5, 123.4, 122.9, 122.2, 121.8, 121.2, 119.5, 111.3, 110.1, 106.6, 55.5, 34.1, 21.2, 20.9; IR (KBr) ν: 3034, 2938, 2867, 2345, 1876, 1764, 1711, 1631, 1538, 1475, 1453, 1376, 1238, 1178, 911, 852, 747 cm<sup>-1</sup>; MS (*m/z*): HRMS (ESI-TOF) Calcd. for C<sub>42</sub>H<sub>31</sub>NaN<sub>3</sub>O<sub>2</sub> ([M+Na]<sup>+</sup>): 632.2308, Found: 632.2298.

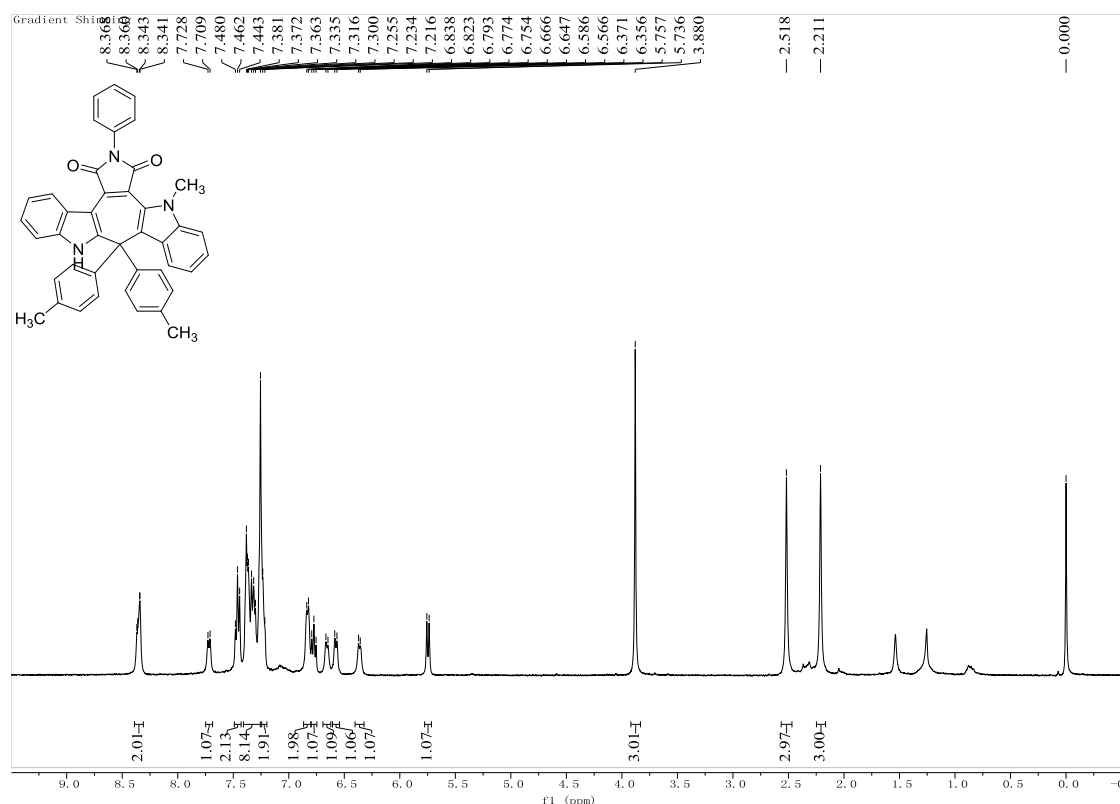

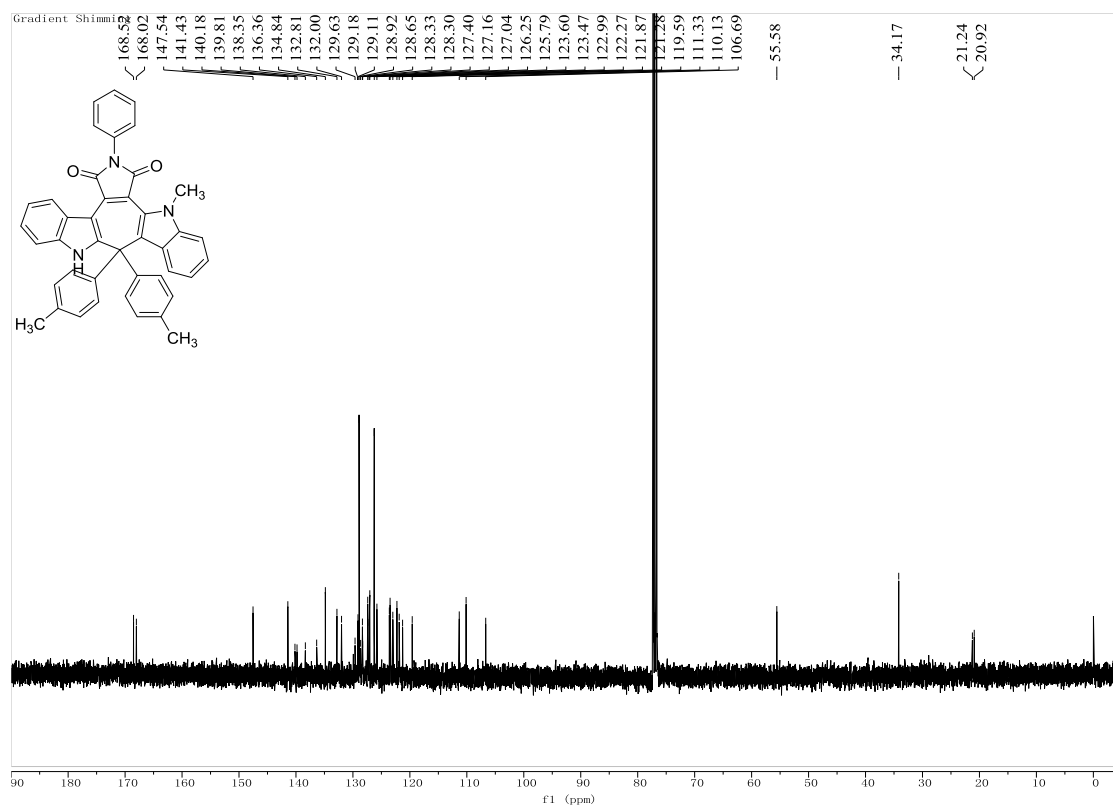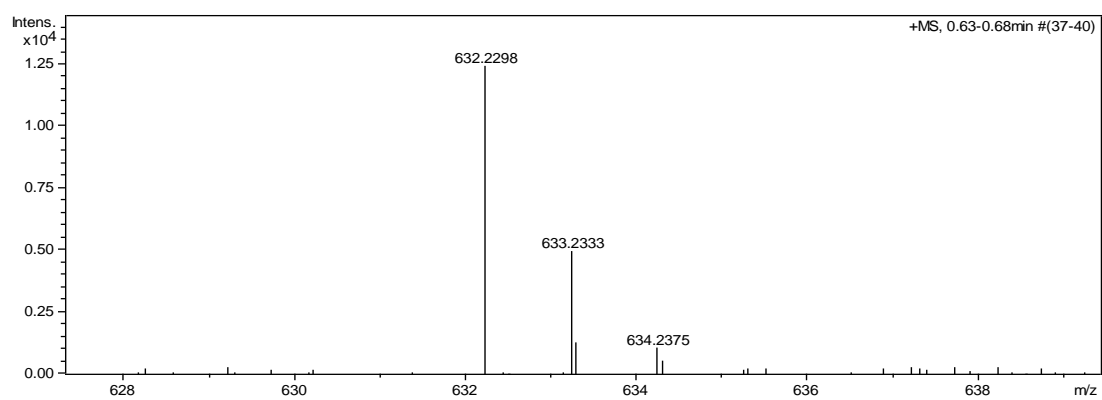

**2-benzyl-14-methyl-9,9-di-p-tolyl-9,14-dihydropyrrolo[3',4':6,7]cyclohepta[1,2-b:4,5-**

**b']diindole-1,3(2H,8H)-dione (3f):** petroleum ether and ethyl acetate (V/V = 10:1) as the eluent, red solid, 449 mg, red solid, 72%, m.p. 252-255 °C; <sup>1</sup>H NMR (600 MHz, CDCl<sub>3</sub>) δ: 8.30-8.29 (m, 2H, ArH), 7.71 (s, 1H, ArH), 7.36-7.28 (m, 4H, ArH), 7.24-7.21 (m, 5H, ArH), 7.13-7.12 (m, 2H, ArH), 6.79-6.74 (m, 3H, ArH), 6.61-6.54 (m, 2H, ArH), 6.31 (s, 1H, ArH), 5.71 (d, *J* = 8.4 Hz, 1H, ArH), 4.74 (s, 2H, CH), 3.83 (s, 3H, CH<sub>3</sub>), 2.51 (s, 3H, CH<sub>3</sub>); 2.20 (s, 3H, CH<sub>3</sub>); <sup>13</sup>C NMR (100 MHz, CDCl<sub>3</sub>) δ: 169.4, 168.9, 147.1, 141.3, 140.1, 139.7, 138.2, 136.6, 136.1, 134.8, 133.1, 132.8, 130.0, 129.9, 129.6, 129.2, 129.1, 128.5, 128.4, 128.2, 127.4, 127.2, 127.0, 126.6, 125.7, 123.5, 123.4, 122.8, 122.1, 121.8, 121.4, 119.5, 115.0, 111.3, 110.0, 106.7, 55.5, 41.3, 34.0, 21.2, 21.0; IR (KBr) ν: 3021, 2933, 2854, 2357, 1880, 1776, 1605, 1532, 1455, 1447, 1356, 1276, 1165, 956, 837, 754 cm<sup>-1</sup>; MS (*m/z*): HRMS (ESI-TOF) Calcd. for C<sub>43</sub>H<sub>33</sub>NaN<sub>3</sub>O<sub>2</sub> ([M+Na]<sup>+</sup>): 646.2465, Found: 646.2455.

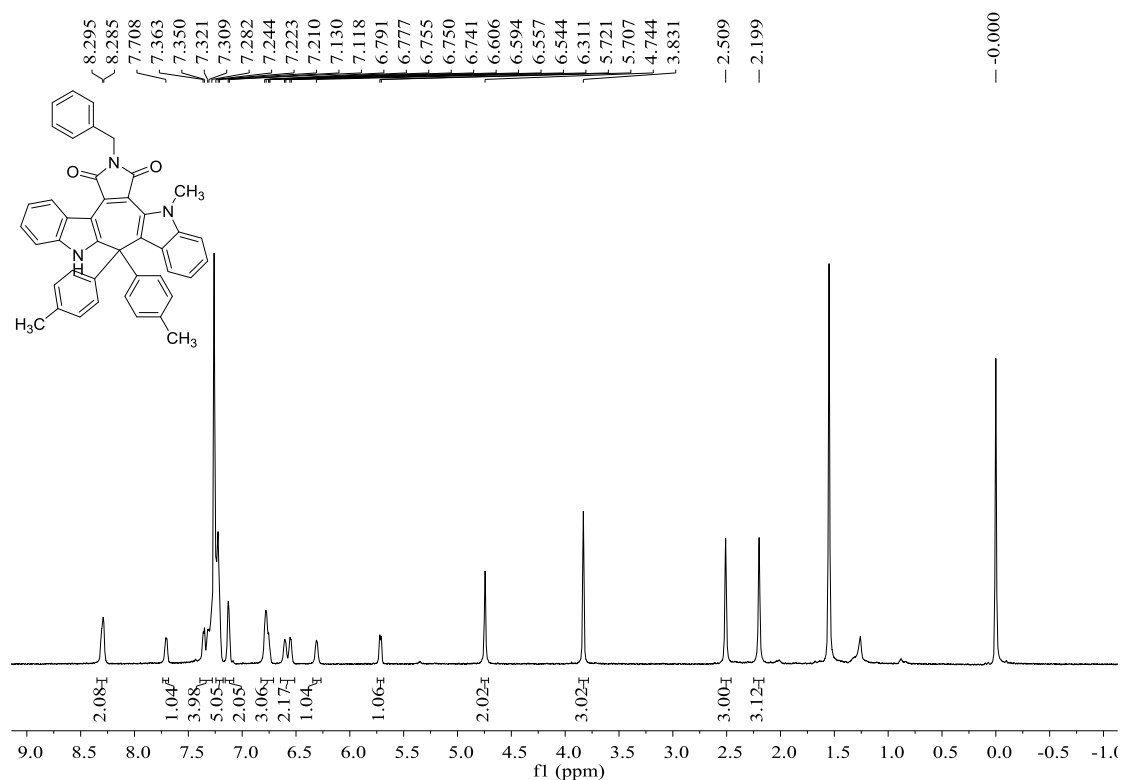

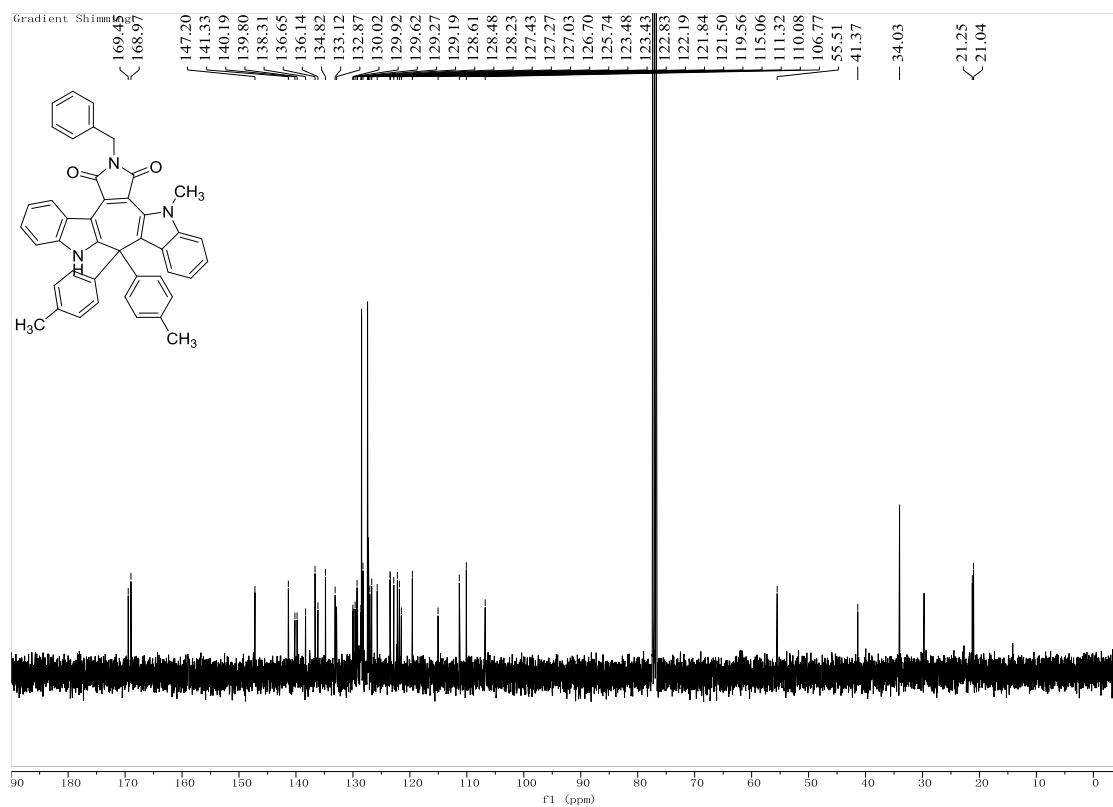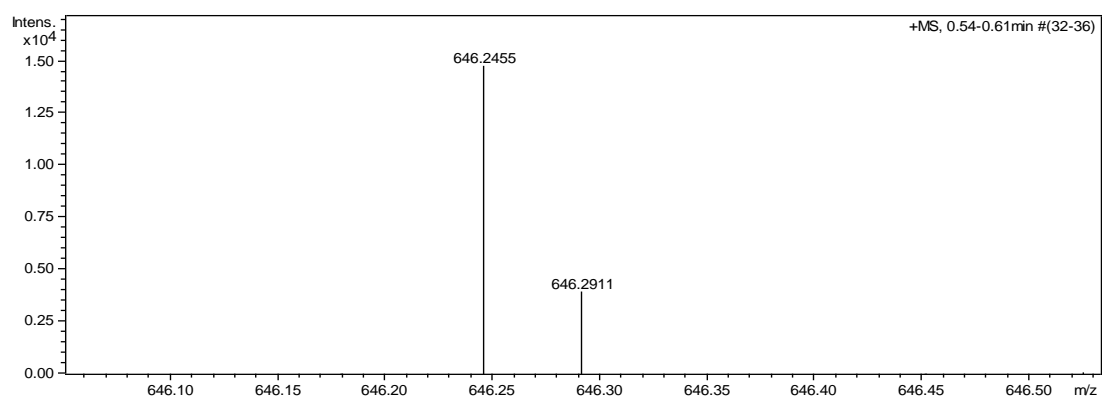

**9,9-bis(4-fluorophenyl)-2,14-dimethyl-9,14-dihydropyrrolo[3',4':6,7]cyclohepta[1,2-*b*:4,5-*b'*]diindole-1,3(2*H*,8*H*)-dione (3g):** petroleum ether and ethyl acetate (V/V = 10:1) as the eluent, red solid, 472 mg, red solid, 85%, m.p. 236-238 °C; <sup>1</sup>H NMR (400 MHz, CDCl<sub>3</sub>) δ: 8.34-8.32 (m, 1H, ArH), 8.12 (s, 1H, NH), 7.79-7.76 (m, 1H, ArH), 7.38 (d, *J* = 8.8 Hz, 1H, ArH), 7.32-7.20 (m, 5H, ArH), 7.15-7.11 (m, 1H, ArH), 6.82-6.70 (m, 4H, ArH), 6.61-6.58 (m, 1H, ArH), 6.44-6.41 (m, 1H, ArH), 5.67 (d, *J* = 8.4 Hz, 1H, ArH), 3.84 (s, 3H, CH<sub>3</sub>), 3.07 (s, 3H, CH<sub>3</sub>); <sup>13</sup>C NMR (100 MHz, CDCl<sub>3</sub>) δ: 169.6, 169.2, 162.6 (d, *J* = 248.5 Hz), 161.5 (d, *J* = 245.7 Hz), 145.6, 141.4, 139.1, 139.0, 138.7, 138.6, 134.8, 134.7, 134.7, 132.8, 131.5, 131.4, 130.3, 130.2, 129.2, 129.0, 128.9, 126.7, 125.8, 125.6, 123.8, 122.9, 122.1, 121.6, 121.5, 120.0, 116.0 (d, *J* = 22.2 Hz), 115.6 (d, *J* = 20.3 Hz), 114.9 (d, *J* = 21.0 Hz), 114.7 (d, *J* = 21.4 Hz), 111.3, 110.3, 107.0, 55.2, 34.2, 24.1; IR (KBr) ν: 3024, 2936, 2863, 2356, 1877, 1722, 1601, 1533, 1479, 1445, 1368, 1232, 1156, 1125, 833, 737 cm<sup>-1</sup>; MS (*m/z*): HRMS (ESI-TOF) Calcd. for C<sub>35</sub>H<sub>23</sub>F<sub>2</sub>NaN<sub>3</sub>O<sub>2</sub> ([M+Na]<sup>+</sup>): 578.1651, Found: 578.1469.

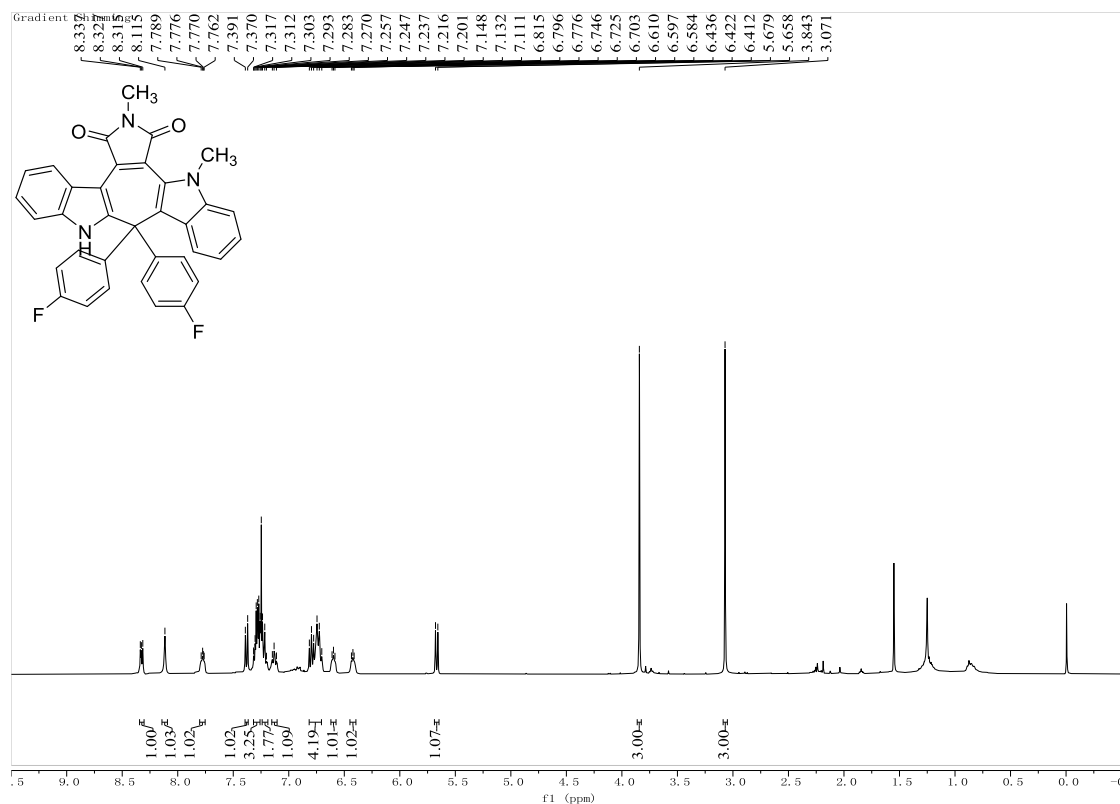



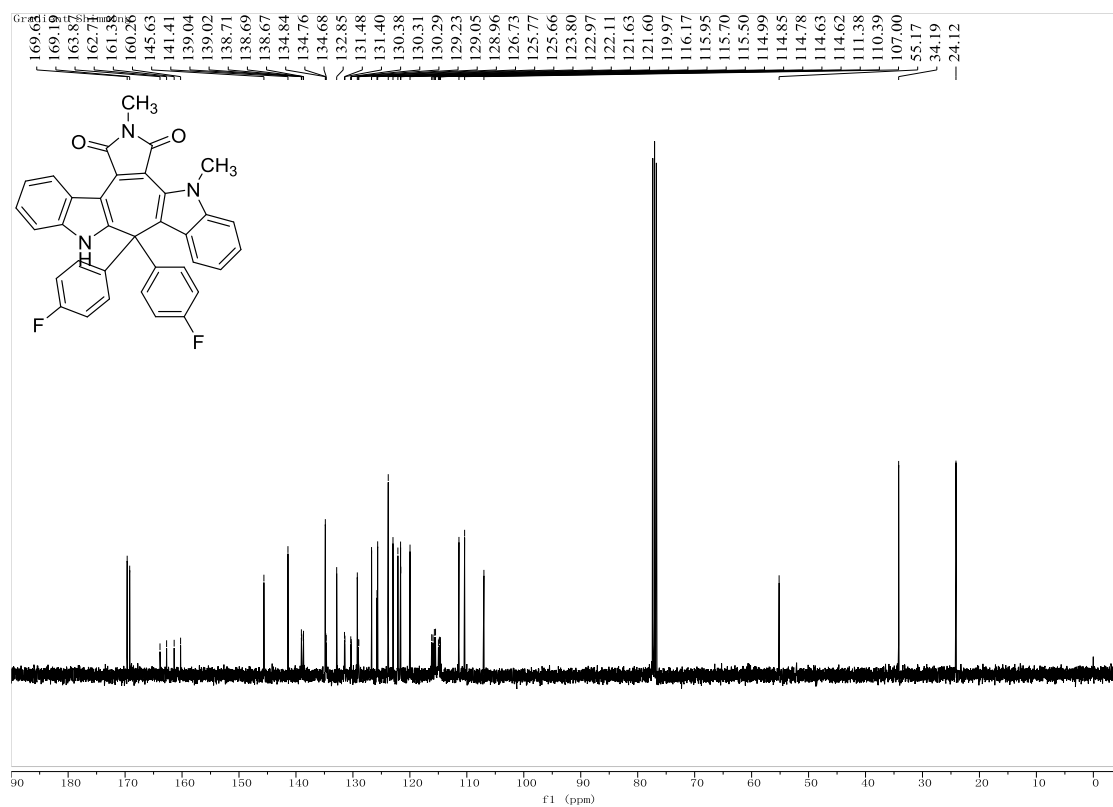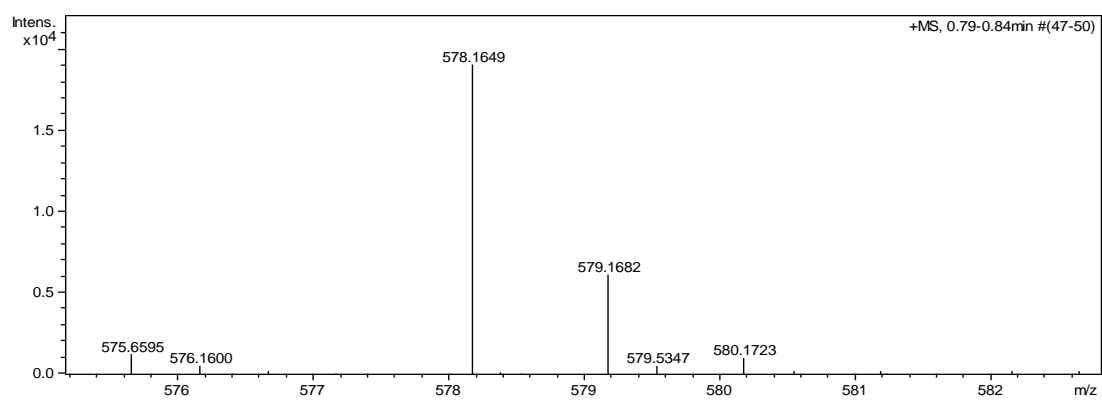

**2-benzyl-9,9-bis(4-fluorophenyl)-14-methyl-9,14-dihydropyrrolo[3',4':6,7]cyclohepta[1,2-*b*:4,5-*b'*]diindole-1,3(2*H*,8*H*)-dione (3h)**: petroleum ether and ethyl acetate (V/V = 10:1) as the eluent, red solid, 543 mg, red solid, 86%, m.p. 222-224 °C; <sup>1</sup>H NMR (400 MHz, CDCl<sub>3</sub>) δ: 8.29-8.28 (m, 1H, ArH), 8.16 (s, 1H, NH), 7.83 (s, 1H, ArH), 7.38 (d, *J* = 8.0 Hz, 1H, ArH), 7.30-7.23 (m, 8H, ArH), 7.16-7.12 (m, 1H, ArH), 7.05 (d, *J* = 6.4 Hz, 2H, ArH), 6.80 (d, *J* = 7.6 Hz, 1H, ArH), 6.71-6.64 (m, 4H, ArH), 6.41-6.40 (m, 1H, ArH), 5.68 (d, *J* = 8.0 Hz, 1H, ArH), 4.75 (s, 2H, CH), 3.84 (s, 3H, CH<sub>3</sub>); <sup>13</sup>C NMR (100 MHz, CDCl<sub>3</sub>) δ: 169.1, 168.7, 162.7 (d, *J* = 249.3 Hz), 161.4 (d, *J* = 245.9 Hz), 146.2, 141.2, 138.9, 138.2, 136.3, 134.8, 134.6, 134.5, 133.0, 131.5, 131.5, 130.5, 130.5, 130.4, 130.4, 129.1, 129.1, 128.5, 127.4, 127.1, 126.6, 126.5, 126.1, 125.6, 123.8, 122.8, 122.1, 121.7, 121.5, 119.9, 116.1 (d, *J* = 20.2 Hz), 115.7 (d, *J* = 21.4 Hz), 114.6 (d, *J* = 21.4 Hz), 114.6 (d, *J* = 21.4 Hz), 110.3, 106.9, 55.1, 41.4, 34.0; IR (KBr) ν: 3045, 2935, 2866, 1879, 1770, 1714, 1615, 1546, 1465, 1445, 1367, 1244, 1176, 820, 734 cm<sup>-1</sup>; MS (*m/z*): HRMS (ESI-TOF) Calcd. for C<sub>41</sub>H<sub>27</sub>F<sub>2</sub>NaN<sub>3</sub>O<sub>2</sub> ([M+Na]<sup>+</sup>): 654.1964, Found: 654.1956.

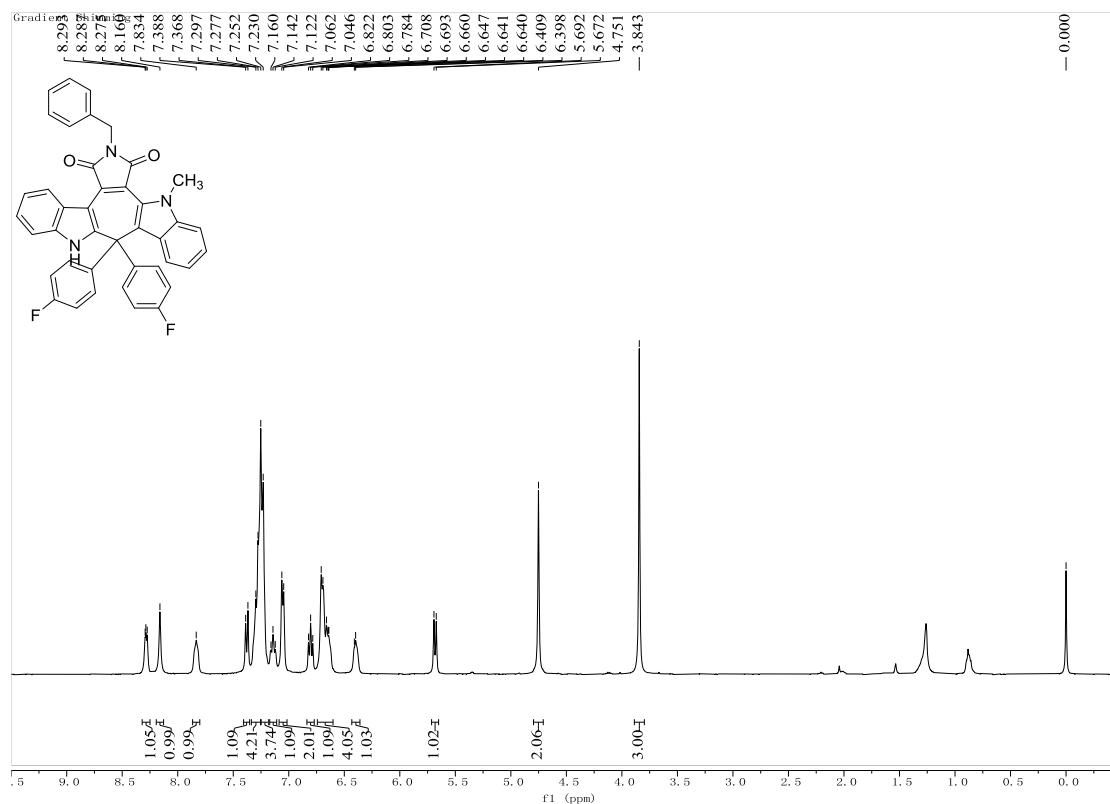

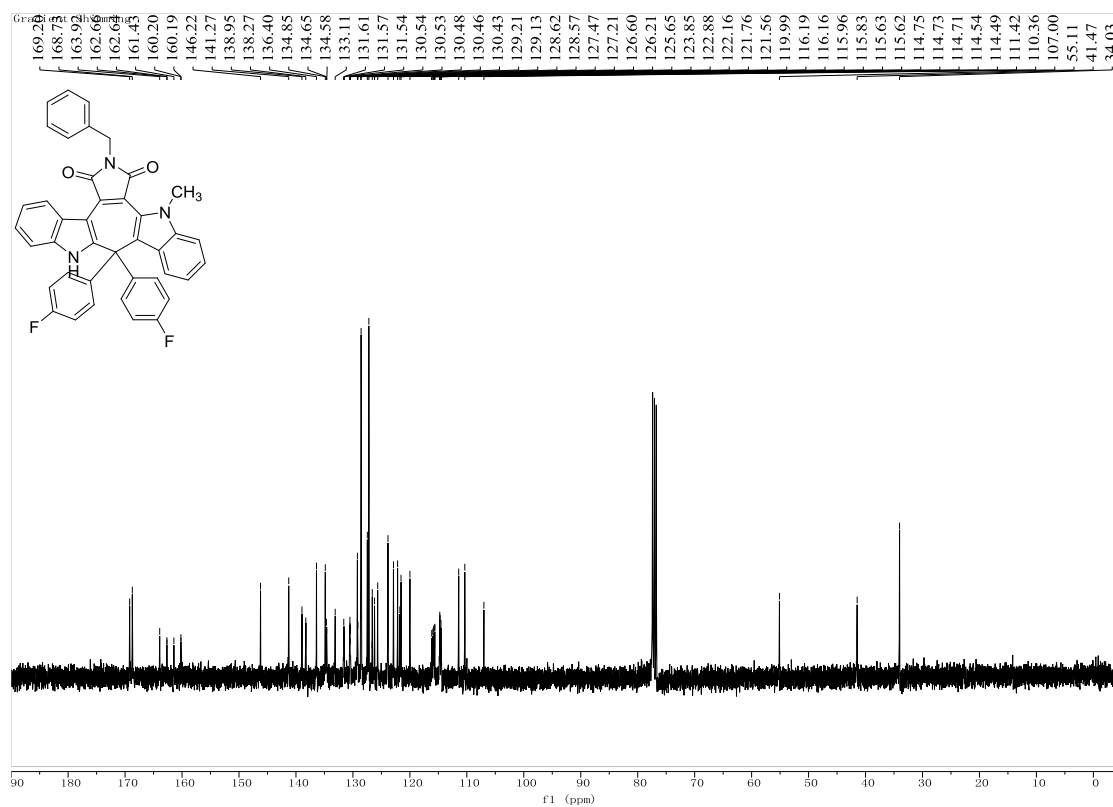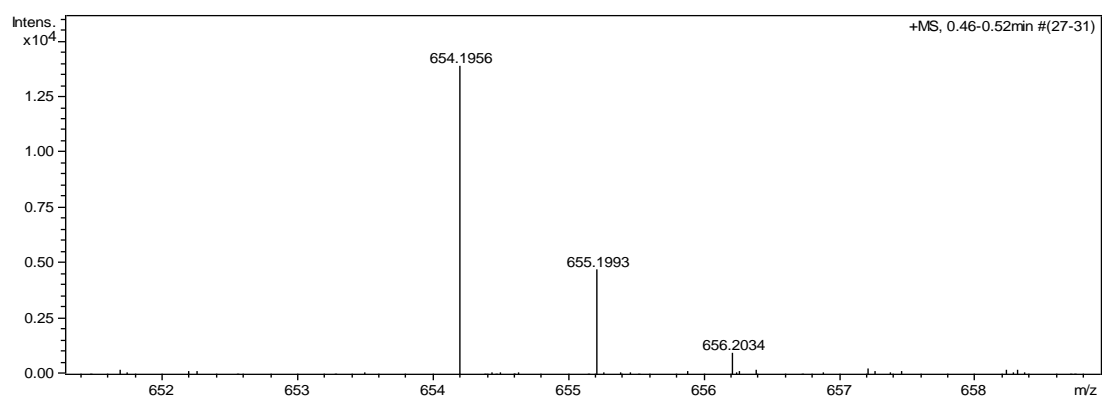

**9,9-bis(4-chlorophenyl)-2,14-dimethyl-9,14-dihydropyrrolo[3',4':6,7]cyclohepta[1,2-*b*:4,5-*b'*]diindole-1,3(2*H*,8*H*)-dione (3i)**: petroleum ether and ethyl acetate (V/V = 10:1) as the eluent, red solid, 517 mg, red solid, 88%, m.p. 246-248 °C; <sup>1</sup>H NMR (400 MHz, CDCl<sub>3</sub>) δ: 8.34-8.32 (m, 1H, ArH), 8.09 (s, 1H, NH), 7.74 (d, *J* = 8.0 Hz, 1H, ArH), 7.48 (d, *J* = 8.4 Hz, 1H, ArH), 7.43 (d, *J* = 7.6 Hz, 1H, ArH), 7.39 (d, *J* = 8.0 Hz, 1H, ArH), 7.33-7.23 (m, 4H, ArH), 7.01 (d, *J* = 7.2 Hz, 2H, ArH), 6.82 (t, *J* = 7.6 Hz, 1H, ArH), 6.73 (d, *J* = 7.2 Hz, 1H, ArH), 6.56 (d, *J* = 7.2 Hz, 1H, ArH), 6.39 (d, *J* = 7.2 Hz, 1H, ArH), 5.73 (d, *J* = 8.4 Hz, 1H, ArH), 3.85 (s, 3H, CH<sub>3</sub>), 3.09 (s, 3H, CH<sub>3</sub>); <sup>13</sup>C NMR (100 MHz, CDCl<sub>3</sub>) δ: 169.5, 169.1, 144.9, 141.6, 141.4, 141.0, 134.9, 134.8, 134.4, 132.9, 132.7, 130.9, 130.0, 129.2, 128.8, 128.7, 128.2, 128.0, 126.6, 125.5, 125.1, 123.8, 123.0, 122.1, 121.6, 121.5, 120.0, 111.4, 110.4, 107.1, 55.4, 34.2, 24.1; IR (KBr) ν: 3044, 2934, 2856, 2356, 1851, 1756, 1614, 1553, 1478, 1443, 1381, 1244, 1198, 1122, 833, 745 cm<sup>-1</sup>; MS (*m/z*): HRMS (ESI-TOF) Calcd. for C<sub>35</sub>H<sub>23</sub>Cl<sub>2</sub>NaN<sub>3</sub>O<sub>2</sub> ([M+Na]<sup>+</sup>): 610.1060, Found: 610.1061.

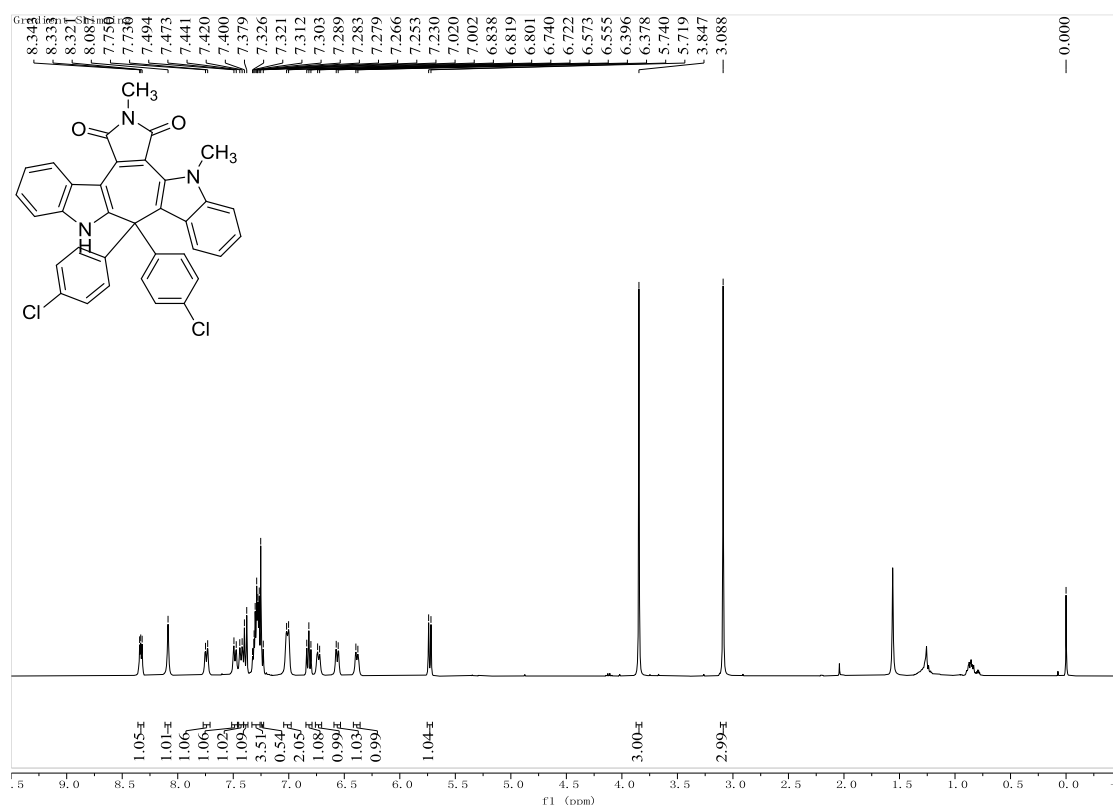

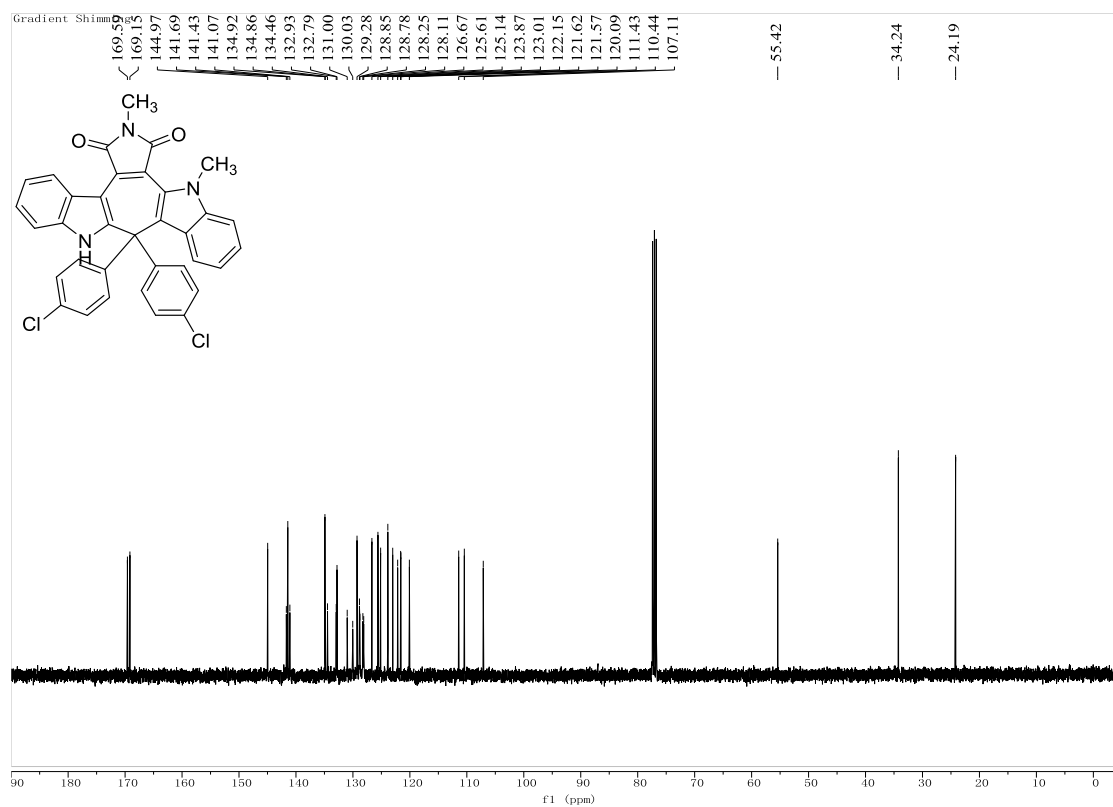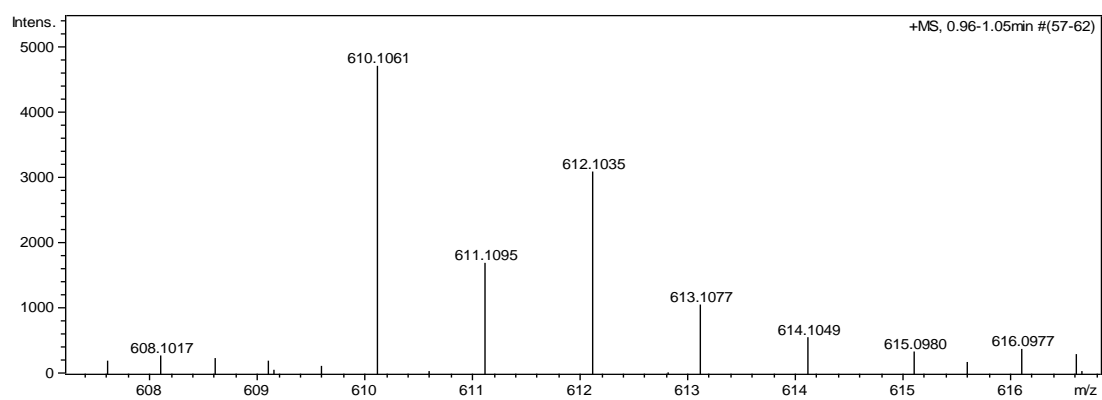

**9,9-bis(4-chlorophenyl)-14-methyl-2-phenyl-9,14-dihydropyrrolo[3',4':6,7]cyclohepta[1,2-*b*:4,5-*b'*]diindole-1,3(2*H*,8*H*)-dione (3j)**: petroleum ether and ethyl acetate (V/V = 10:1) as the eluent, red solid, 576 mg, red solid, 88%, m.p. 231-233 °C; <sup>1</sup>H NMR (600 MHz, CDCl<sub>3</sub>) δ: 8.37-8.36 (m, 1H, ArH), 8.17 (s, 1H, NH), 7.80 (d, *J* = 7.8 Hz, 1H, ArH), 7.52 (d, *J* = 7.8 Hz, 1H, ArH), 7.49-7.45 (m, 3H, ArH), 7.42-7.33 (m, 5H, ArH), 7.29-7.27 (m, 3H, ArH), 7.04 (d, *J* = 7.8 Hz, 2H, ArH), 6.86-6.84 (m, 1H, ArH), 6.76 (d, *J* = 7.8 Hz, 1H, ArH), 6.62 (d, *J* = 7.8 Hz, 1H, ArH), 6.44-6.43 (m, 1H, ArH), 5.78 (d, *J* = 8.4 Hz, 1H, ArH), 3.89 (s, 3H, CH<sub>3</sub>); <sup>13</sup>C NMR (100 MHz, CDCl<sub>3</sub>) δ: 168.2, 167.7, 145.7, 141.5, 141.4, 140.7, 134.9, 134.3, 133.0, 132.6, 131.7, 131.0, 130.1, 129.3, 129.1, 129.0, 128.8, 128.1, 128.0, 127.6, 126.5, 126.3, 125.8, 125.6, 124.0, 123.9, 123.1, 122.2, 121.6, 121.3, 120.1, 111.4, 110.4, 107.0, 77.2, 55.4, 34.2; IR (KBr) ν: 3033, 2938, 2856, 2356, 1871, 1780, 1722, 1605, 1556, 1490, 1434, 1382, 1235, 1179, 1118, 845, 738 cm<sup>-1</sup>; MS (*m/z*): HRMS (ESI-TOF) Calcd. for C<sub>40</sub>H<sub>25</sub>Cl<sub>2</sub>NaN<sub>3</sub>O<sub>2</sub> ([M+Na]<sup>+</sup>): 672.1216, Found: 672.1201.

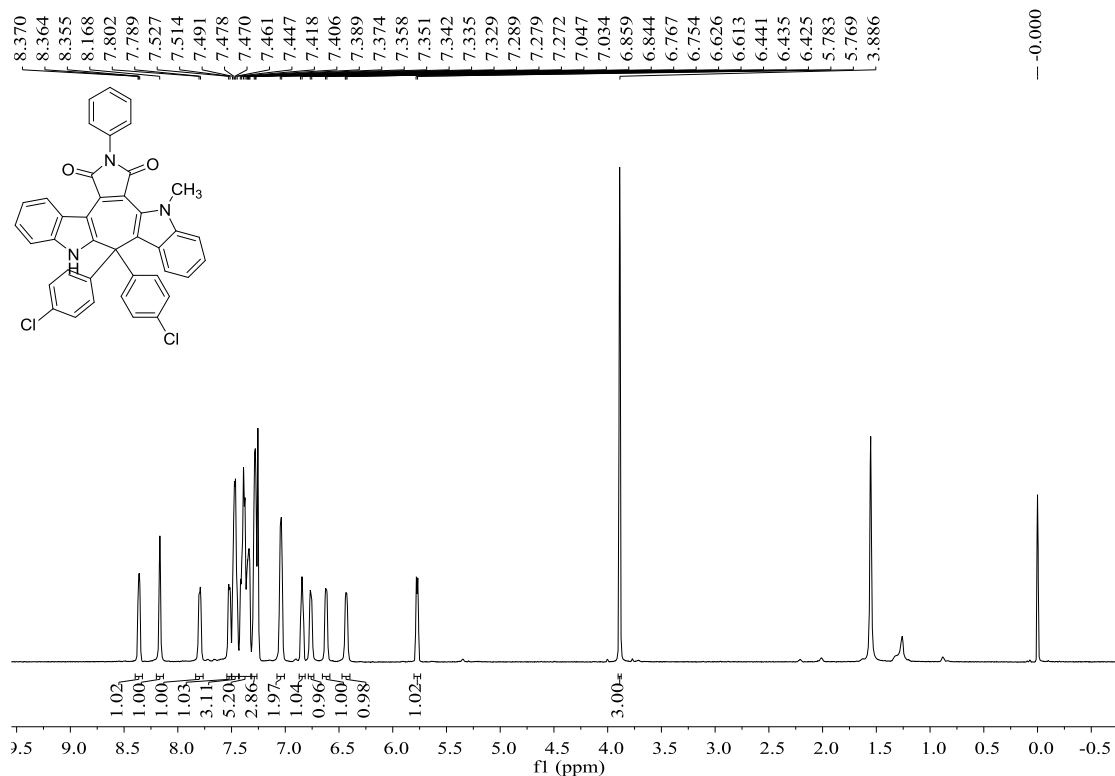

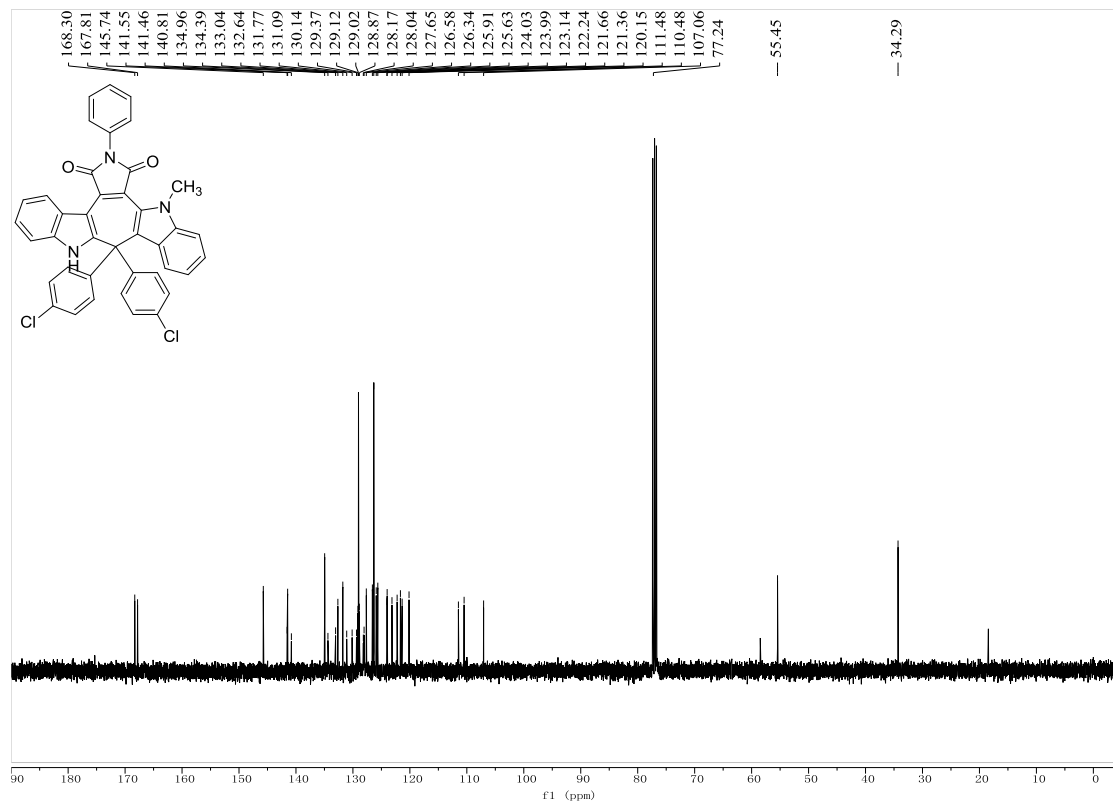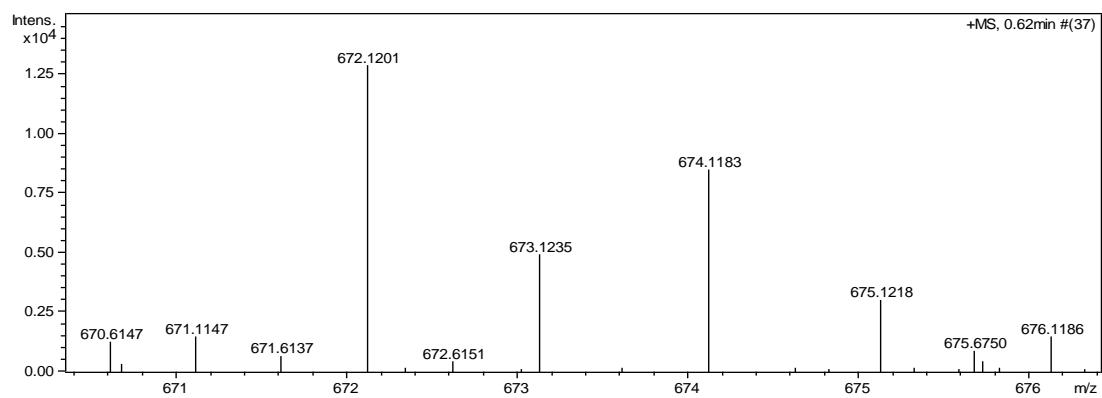

**2-benzyl-9,9-bis(4-chlorophenyl)-14-methyl-9,14-dihydropyrrolo[3',4':6,7]cyclohepta[1,2-*b*:4,5-*b'*]diindole-1,3(2*H*,8*H*)-dione (3k)**: petroleum ether and ethyl acetate (V/V = 10:1) as the eluent, red solid, 590 mg, red solid, 89%, m.p. 216-218 °C; <sup>1</sup>H NMR (400 MHz, CDCl<sub>3</sub>) δ: 8.31-8.28 (m, 1H, ArH), 8.13 (s, 1H, NH), 7.78 (d, *J* = 7.6 Hz, 1H, ArH), 7.51 (d, *J* = 7.6 Hz, 1H, ArH), 7.44 (d, *J* = 7.6 Hz, 1H, ArH), 7.38 (d, *J* = 8.4 Hz, 1H, ArH), 7.30-7.23 (m, 7H, ArH), 7.09 (d, *J* = 7.2 Hz, 2H, ArH), 6.98 (t, *J* = 6.8 Hz, 2H, ArH), 6.82 (t, *J* = 7.6 Hz, 1H, ArH), 6.70 (d, *J* = 8.0 Hz, 1H, ArH), 6.60 (d, *J* = 8.0 Hz, 1H, ArH), 6.37 (d, *J* = 8.0 Hz, 1H, ArH), 5.74 (d, *J* = 7.6 Hz, 1H, ArH), 4.76 (s, 2H, CH), 3.84 (s, 3H, CH<sub>3</sub>); <sup>13</sup>C NMR (100 MHz, CDCl<sub>3</sub>) δ: 169.1, 168.6, 145.3, 141.5, 141.2, 140.6, 136.3, 134.9, 134.8, 134.3, 132.9, 132.8, 131.0, 130.1, 129.3, 129.2, 128.8, 128.6, 128.0, 127.9, 127.4, 127.2, 126.5, 125.5, 125.4, 123.9, 123.8, 122.9, 122.1, 121.6, 121.5, 120.0, 111.4, 110.3, 107.0, 55.3, 41.5, 34.0; IR (KBr) ν: 3035, 2934, 2852, 2366, 1878, 1765, 1723, 1643, 1556, 1424, 1443, 1371, 1256, 1190, 1122, 832, 744 cm<sup>-1</sup>; MS (*m/z*): HRMS (ESI-TOF) Calcd. for C<sub>41</sub>H<sub>27</sub>Cl<sub>2</sub>NaN<sub>3</sub>O<sub>2</sub> ([M+Na]<sup>+</sup>): 686.1373, Found: 686.1367.

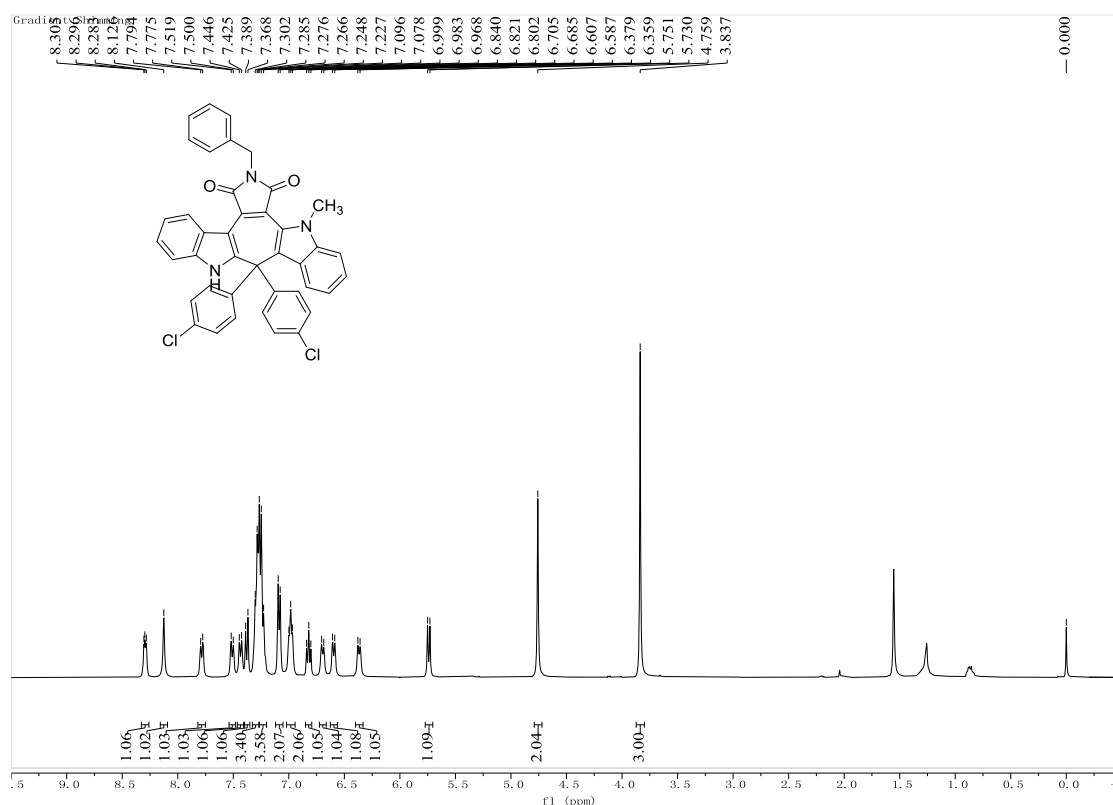



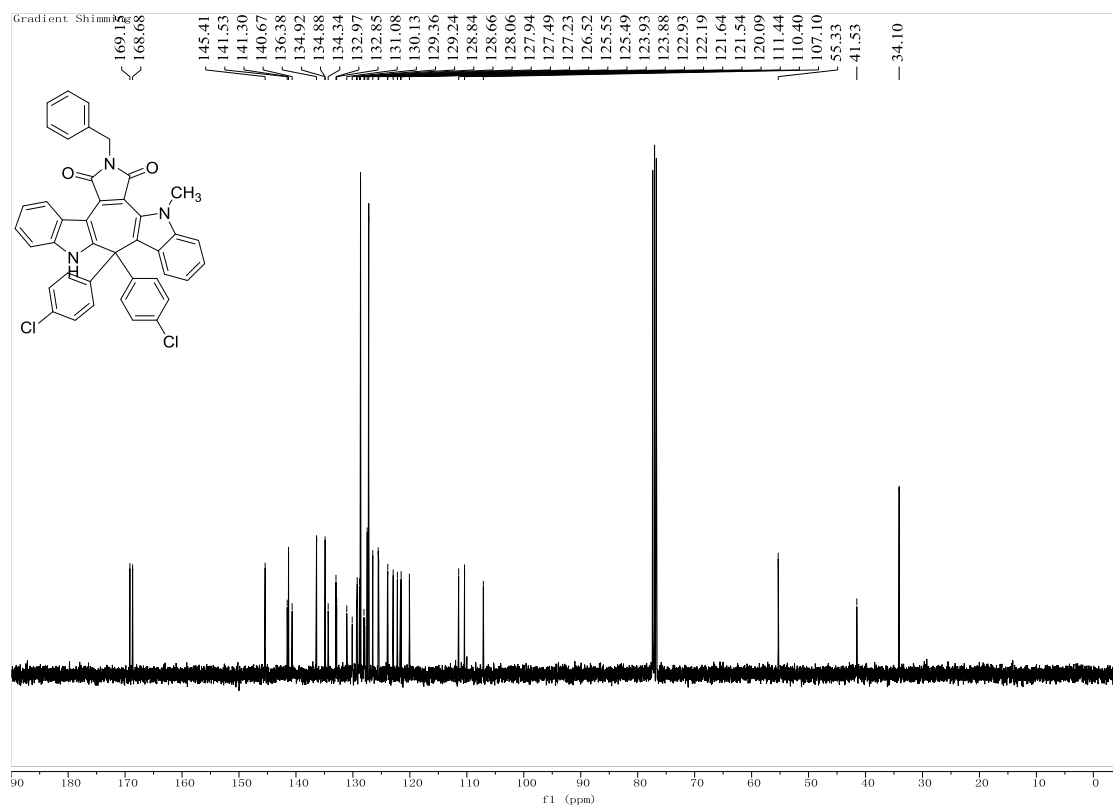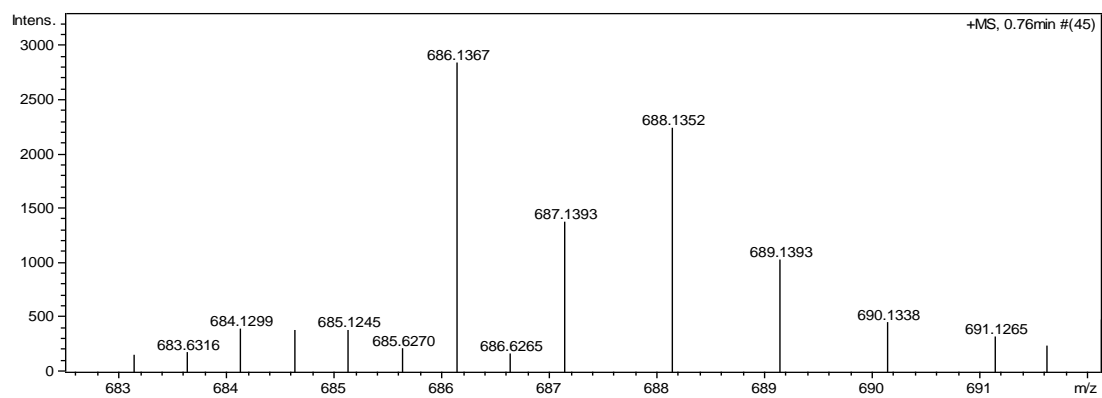

**1-benzyl-2'-methyl-3a'-(1-methyl-1*H*-indol-3-yl)-3a',9a'-dihydrospiro[indoline-3,9'-**

**pyrrolo[3',4':4,5]cyclopenta[1,2-*b*]indole]-1',2,3'(2'*H*,4'*H*)-trione (5a):** petroleum ether and methylene dichloride (V/V = 4:1) as the eluent, white solid, 507 mg, white solid, 88%, m.p. 248-250 °C; <sup>1</sup>H NMR (400 MHz, CDCl<sub>3</sub>) δ: 8.44 (s, 1H, NH), 7.64 (d, *J* = 8.0 Hz, 1H, ArH), 7.42-7.40 (m, 2H, ArH), 7.36-7.31 (m, 3H, ArH), 7.31-7.26 (m, 2H, ArH), 7.25-7.19 (m, 2H, ArH), 7.14-7.08 (m, 3H, ArH), 6.92-6.86 (m, 3H, ArH), 6.67 (d, *J* = 8.0 Hz, 1H, ArH), 6.62 (d, *J* = 7.6 Hz, 1H, ArH), 5.23 (d, *J* = 15.6 Hz, 1H, CH), 4.86 (d, *J* = 15.6 Hz, 1H, CH), 4.62 (s, 1H, CH), 3.76 (s, 3H, CH<sub>3</sub>), 3.12 (s, 3H, CH<sub>3</sub>); <sup>13</sup>C NMR (100 MHz, CDCl<sub>3</sub>) δ: 177.8, 176.8, 174.1, 142.5, 141.7, 141.0, 137.6, 135.7, 129.1, 128.8, 128.8, 128.1, 127.7, 127.4, 125.5, 124.1, 122.8, 122.7, 122.4, 121.8, 120.4, 120.2, 119.7, 119.3, 118.4, 112.5, 110.6, 109.7, 109.6, 67.4, 56.6, 56.3, 44.3, 32.8, 25.3; IR (KBr) ν: 3051, 2924, 2862, 2727, 2527, 2366, 1881, 1770, 1712, 1601, 1542, 1450, 1371, 1244, 1188, 1112, 820, 734 cm<sup>-1</sup>; MS (*m/z*): HRMS (ESI-TOF) Calcd. for C<sub>37</sub>H<sub>29</sub>N<sub>4</sub>O<sub>3</sub> ([M+H]<sup>+</sup>): 577.2234, Found: 577.2247.

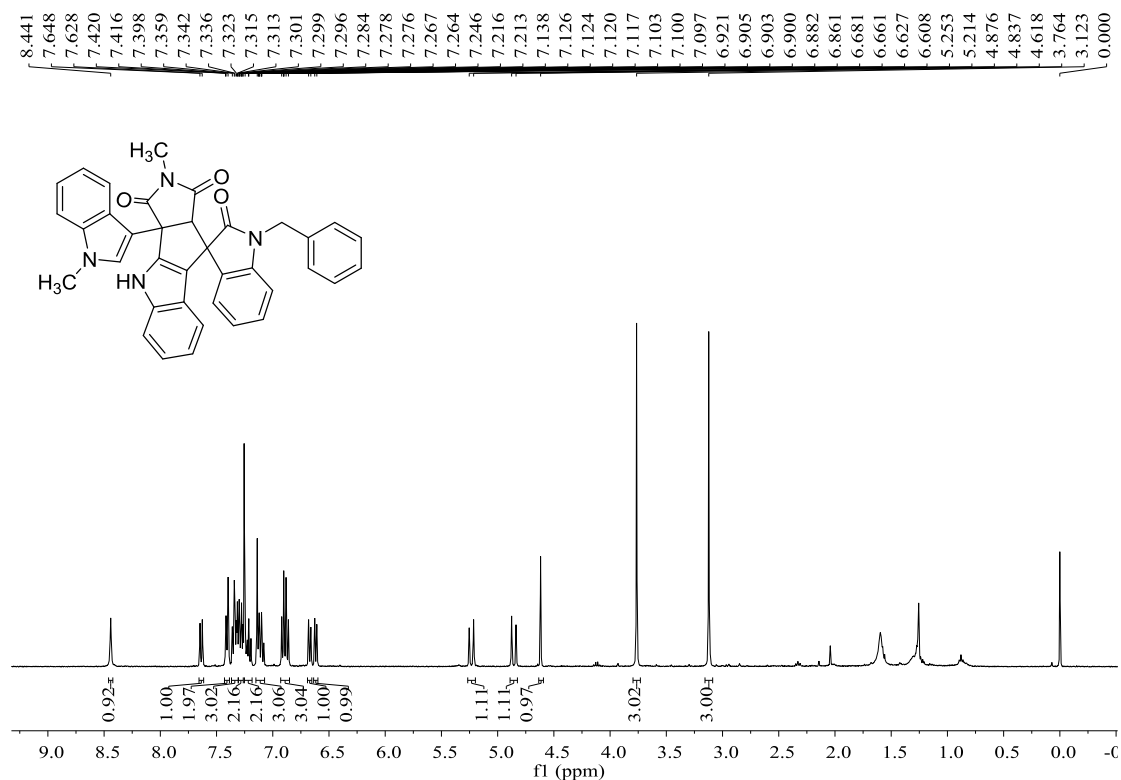

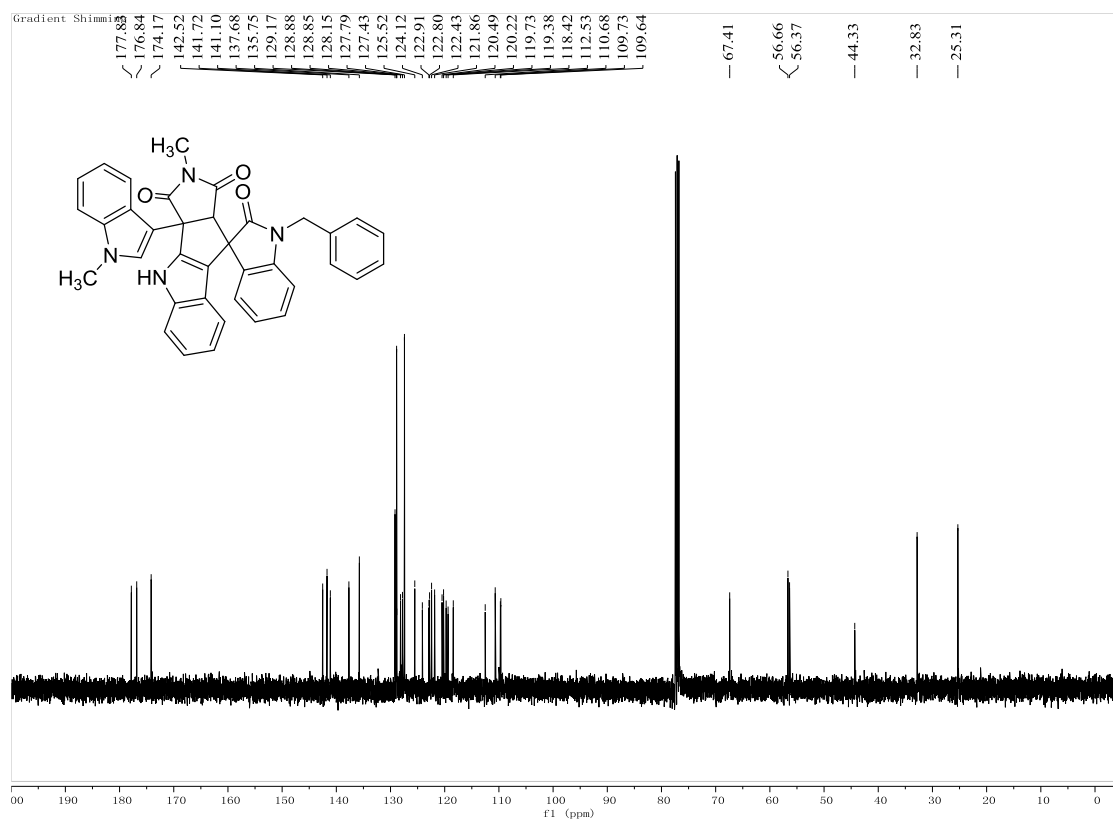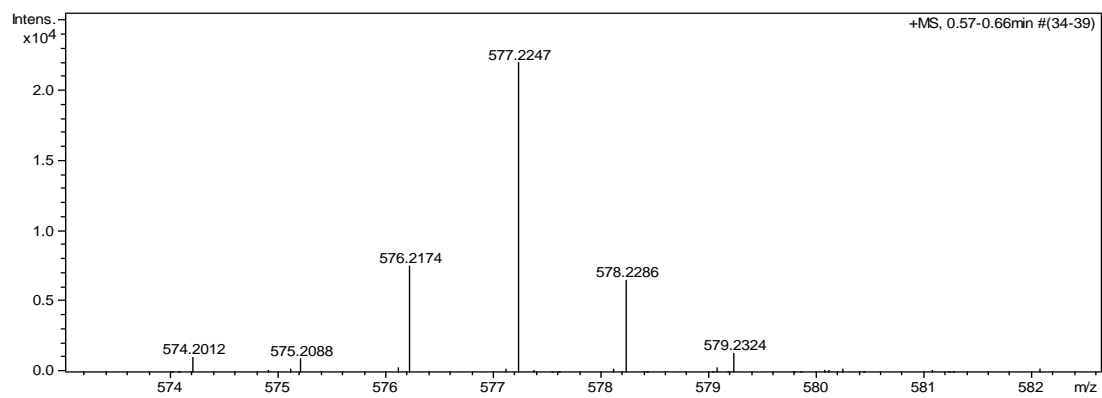

**1-benzyl-2',5-dimethyl-3a'-(1-methyl-1*H*-indol-3-yl)-3a',9a'-dihydrospiro[indoline-3,9'-pyrrolo[3',4':4,5]cyclopenta[1,2-*b*]indole]-1',2,3'(2'*H*,4'*H*)-trione (5b):** petroleum ether and methylene dichloride (V/V = 4:1) as the eluent, white solid, 513 mg, white solid, 87%, m.p. 232-234 °C; <sup>1</sup>H NMR (400 MHz, CDCl<sub>3</sub>) δ: 8.38 (s, 1H, NH), 7.71-7.69 (m, 1H, ArH), 7.42-7.40 (m, 2H, ArH), 7.36-7.28 (m, 5H, ArH), 7.26-7.22 (m, 1H, ArH), 7.15-7.08 (m, 3H, ArH), 7.01-6.99 (m, 1H, ArH), 6.93-6.89 (m, 1H, ArH), 6.75 (d, *J* = 8.0 Hz, 1H, ArH), 6.72 (d, *J* = 7.6 Hz, 1H, ArH), 6.41-6.40 (m, 1H, ArH), 5.21 (d, *J* = 15.6 Hz, 1H, CH), 4.86 (d, *J* = 15.6 Hz, 1H, CH), 4.65 (s, 1H, CH), 3.77 (s, 3H, CH<sub>3</sub>), 3.11 (s, 3H, CH<sub>3</sub>); 2.14 (s, 3H, CH<sub>3</sub>); <sup>13</sup>C NMR (100 MHz, *d*<sub>6</sub>-DMSO) δ: 177.8, 176.2, 174.0, 142.3, 141.6, 140.2, 137.7, 136.8, 132.2, 129.9, 129.6, 129.1, 129.0, 128.0, 127.8, 125.6, 124.7, 122.3, 121.5, 120.0, 119.6, 118.5, 117.9, 113.2, 110.7, 110.6, 109.7, 67.8, 56.7, 56.2, 43.7, 32.9, 25.4, 20.9; IR (KBr) ν: 3054, 2927, 2866, 2745, 2534, 2365, 1871, 1769, 1715, 1608, 1543, 1485, 1443, 1324, 1235, 1181, 1120, 823, 756 cm<sup>-1</sup>; MS (*m/z*): HRMS (ESI-TOF) Calcd. for C<sub>38</sub>H<sub>31</sub>N<sub>4</sub>O<sub>3</sub> ([M+H]<sup>+</sup>): 591.2391, Found: 591.2408.

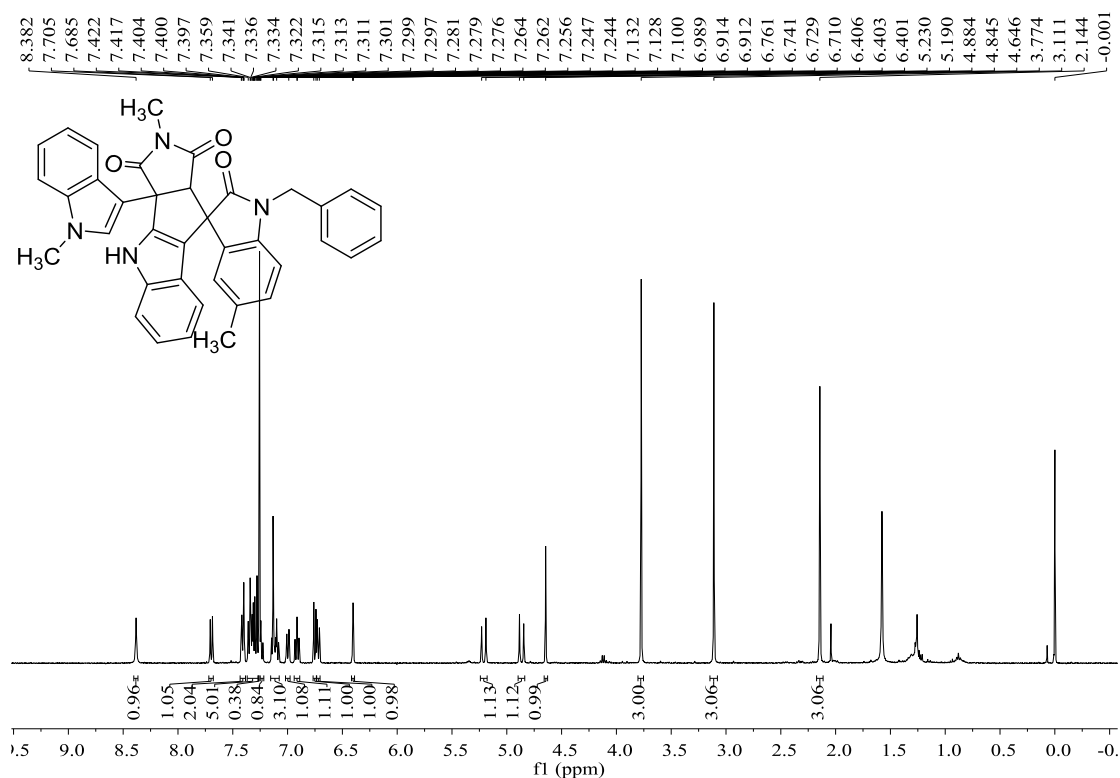

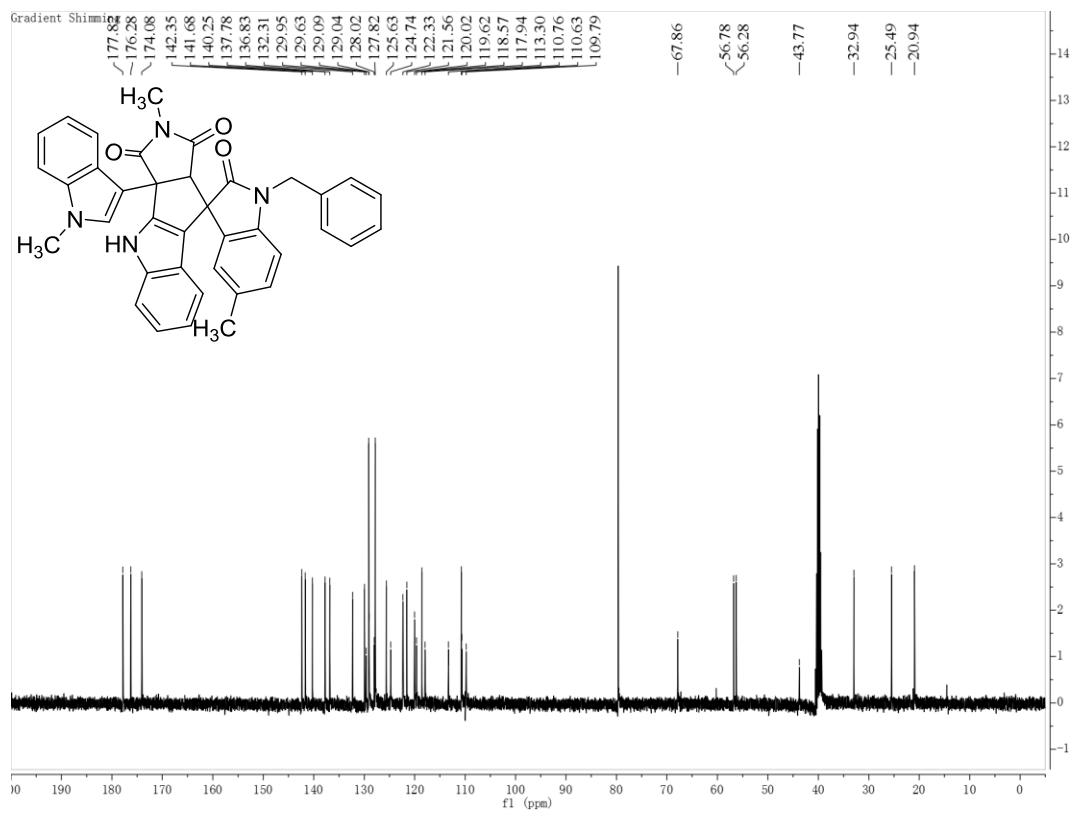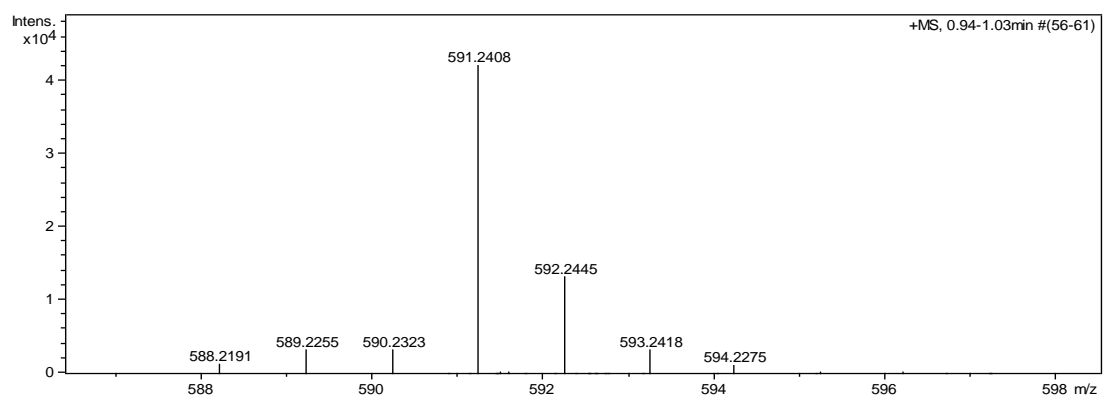

**1-benzyl-5-fluoro-2'-methyl-3a'-(1-methyl-1*H*-indol-3-yl)-3a',9a'-dihydrospiro[indoline-3,9'-pyrrolo[3',4':4,5]cyclopenta[1,2-*b*]indole]-1',2,3'(2'*H*,4'*H*)-trione (5c):** petroleum ether and methylene dichloride (V/V = 4:1) as the eluent, white solid, 535 mg, white solid, 90%, m.p. 227-229 °C; <sup>1</sup>H NMR (400 MHz, *d*<sub>6</sub>-DMSO) δ: 11.87 (s, 1H, NH), 7.50 (d, *J* = 8.0 Hz, 1H, ArH), 7.38-7.30 (m, 8H, ArH), 7.22-7.18 (m, 1H, ArH), 7.24 (d, *J* = 4.8 Hz, 2H, ArH), 7.08 (t, *J* = 6.8 Hz, 1H, ArH), 6.99 (t, *J* = 6.8 Hz, 1H, ArH), 6.83 (t, *J* = 6.4 Hz, 1H, ArH), 6.62 (d, *J* = 7.6 Hz, 1H, ArH), 6.45 (d, *J* = 7.6 Hz, 1H, ArH), 5.09 (d, *J* = 15.6 Hz, 1H, CH), 4.99 (d, *J* = 15.6 Hz, 1H, CH), 4.33 (s, 1H, CH), 3.82 (s, 3H, CH<sub>3</sub>), 3.07 (s, 3H, CH<sub>3</sub>); <sup>13</sup>C NMR (100 MHz, *d*<sub>6</sub>-DMSO) δ: 177.6, 176.0, 173.8, 159.0 (d, *J* = 237.5 Hz), 142.2, 141.7, 138.9 (d, *J* = 1.8 Hz), 137.6, 136.5, 131.5 (d, *J* = 7.9 Hz), 129.2, 129.1, 128.0, 127.7, 125.4, 122.3, 122.1, 121.3, 120.0, 119.9, 119.2, 117.8, 117.5, 115.7 (d, *J* = 23.4 Hz), 113.3, 112.6 (d, *J* = 25.1 Hz), 110.9, 110.8, 110.8, 110.6, 67.2, 56.5, 56.3 (d, *J* = 1.5 Hz), 43.7, 32.9, 25.6; IR (KBr) ν: 3045, 2934, 2852, 2734, 2533, 2376, 1881, 1765, 1722, 1607, 1532, 1478, 1444, 1361, 1228, 1179, 1112, 828, 731 cm<sup>-1</sup>; MS (*m/z*): HRMS (ESI-TOF) Calcd. for C<sub>37</sub>H<sub>27</sub>NaFN<sub>4</sub>O<sub>3</sub> ([M+Na]<sup>+</sup>): 617.1959, Found: 617.1966.

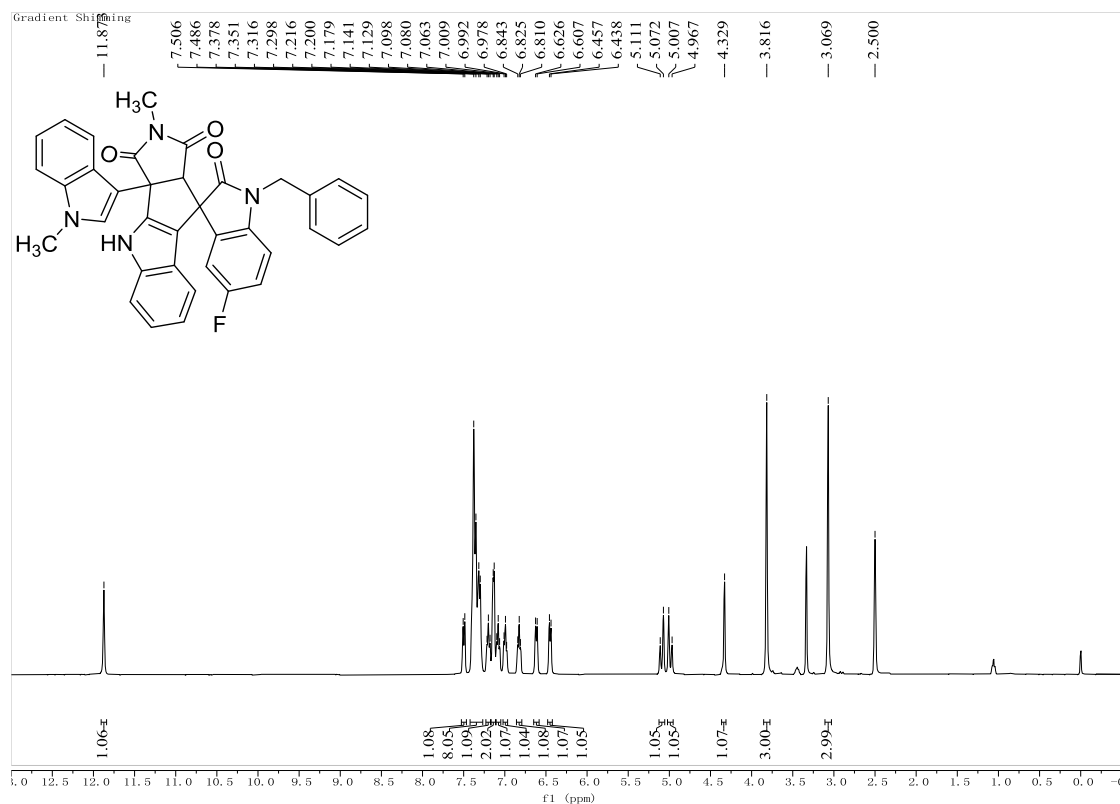

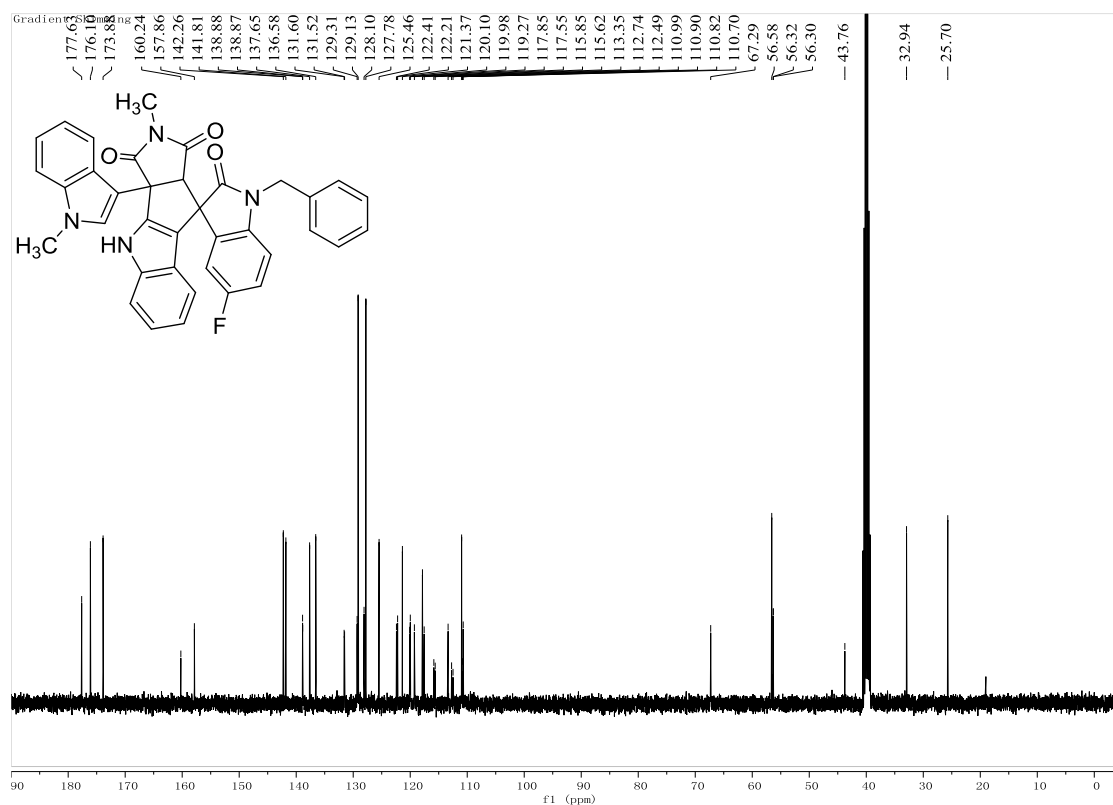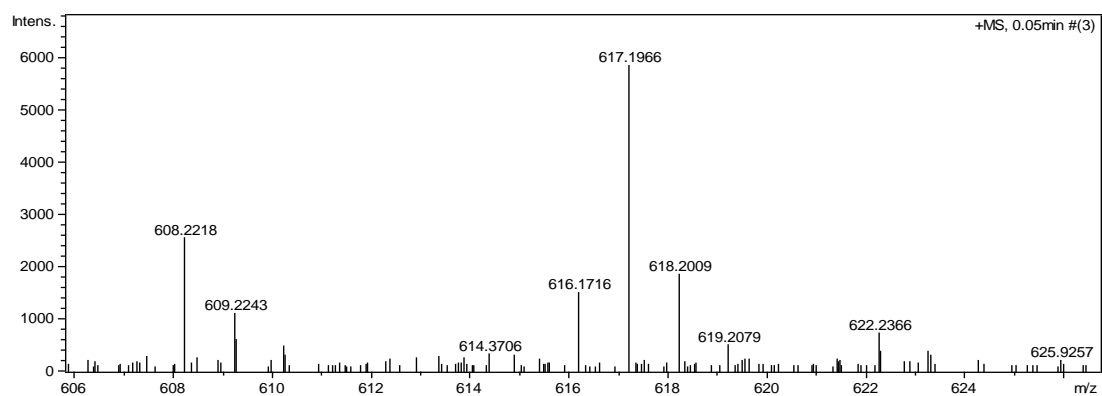

**1-butyl-2',5-dimethyl-3a'-(1-methyl-1*H*-indol-3-yl)-3a',9a'-dihydrospiro[indoline-3,9'-pyrrolo[3',4':4,5]cyclopenta[1,2-*b*]indole]-1',2,3'(2'*H*,4'*H*)-trione (5d):** petroleum ether and methylene dichloride (V/V = 4:1) as the eluent, white solid, 495 mg, white solid, 89%, m.p. 221-224 °C; <sup>1</sup>H NMR (400 MHz, CDCl<sub>3</sub>) δ: 8.42 (s, 1H, NH), 7.66 (d, *J* = 8.0 Hz, 1H, ArH), 7.27-7.21 (m, 2H, ArH), 7.13-7.07 (m, 4H, ArH), 6.93 (t, *J* = 7.2 Hz, 1H, ArH), 6.88 (d, *J* = 8.0 Hz, 1H, ArH), 6.78 (t, *J* = 7.6 Hz, 1H, ArH), 6.40 (s, 1H, ArH), 4.57 (s, 1H, CH), 3.95-3.87 (m, 1H, CH), 3.76-3.70 (m, 1H, CH), 3.74 (s, 3H, CH<sub>3</sub>), 3.10 (s, 3H, CH<sub>3</sub>), 2.18 (s, 3H, CH<sub>3</sub>), 1.82-1.74 (m, 2H, CH), 1.50-1.41 (m, 2H, CH), 0.97 (t, *J* = 7.2 Hz, 3H, CH<sub>3</sub>); <sup>13</sup>C NMR (100 MHz, CDCl<sub>3</sub>) δ: 177.3, 176.8, 174.2, 141.6, 140.9, 140.4, 137.6, 131.9, 129.5, 129.4, 127.9, 125.5, 124.8, 122.6, 122.3, 121.9, 120.4, 120.1, 119.8, 119.5, 118.2, 112.4, 110.6, 109.6, 108.5, 67.4, 56.6, 56.3, 40.4, 32.7, 29.6, 25.1, 21.1, 20.2, 13.8; IR (KBr) ν: 3048, 2921, 2860, 2734, 2537, 2356, 1871, 1768, 1723, 1611, 1534, 1479, 1445, 1378, 1248, 1178, 1122, 832, 743 cm<sup>-1</sup>; MS (*m/z*): HRMS (ESI-TOF) Calcd. for C<sub>35</sub>H<sub>32</sub>NaN<sub>4</sub>O<sub>3</sub> ([M+Na]<sup>+</sup>): 579.2367, Found: 579.2378.

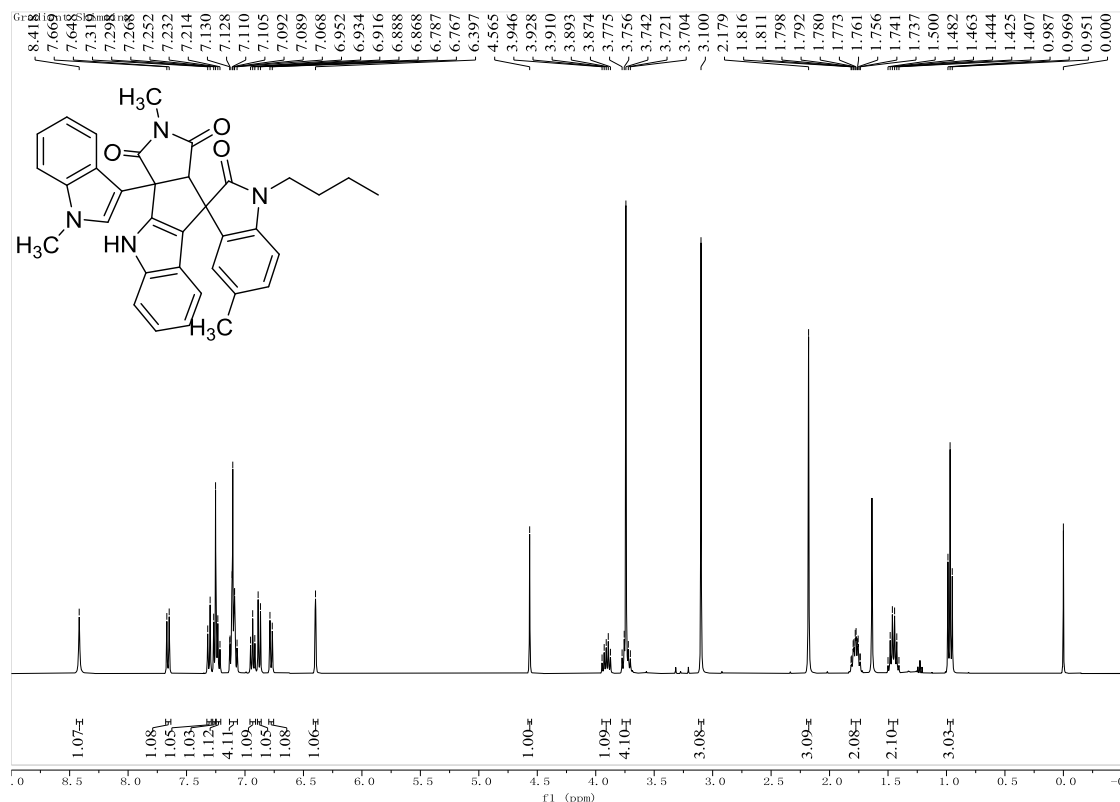



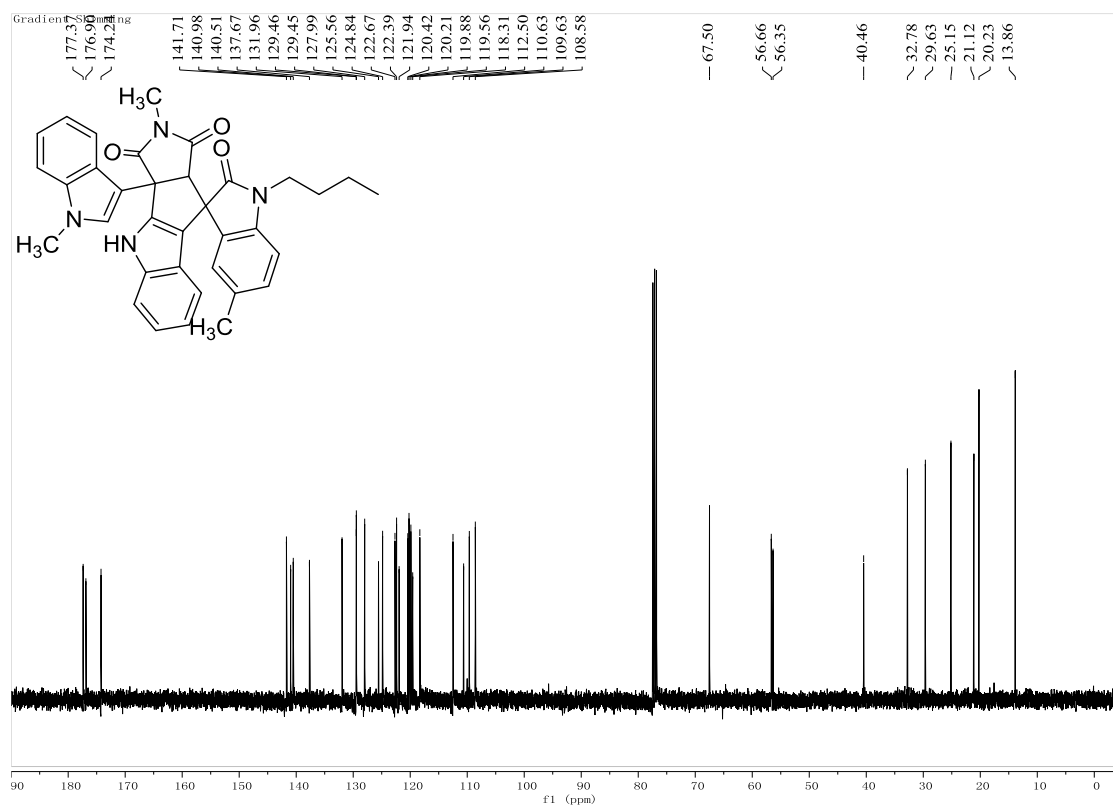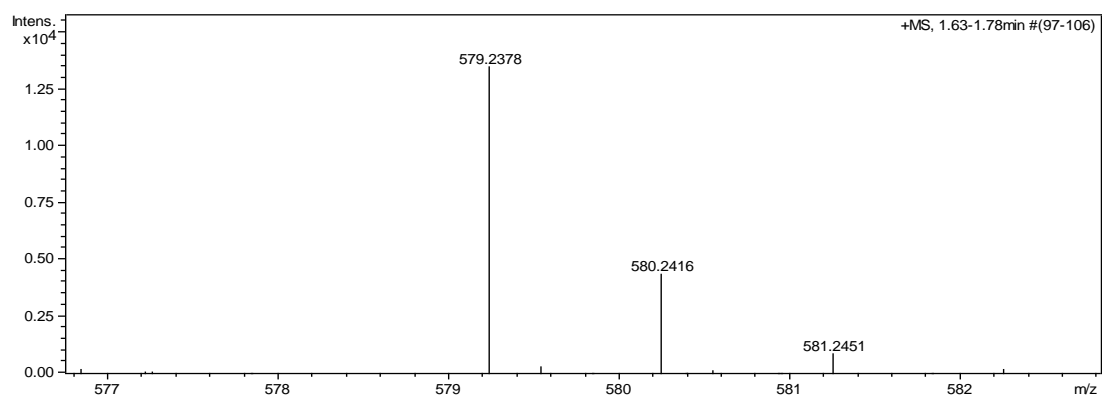

**1,2'-dibenzyl-3a'-(1-methyl-1*H*-indol-3-yl)-3a',9a'-dihydrospiro[indoline-3,9']-pyrrolo[3',4':4,5]cyclopenta[1,2-*b*]indole-1',2,3'(2'*H*,4'*H*)-trione (5e):** petroleum ether and methylene dichloride (V/V = 4:1) as the eluent, white solid, 580 mg, white solid, 89%, m.p. 228-230 °C; <sup>1</sup>H NMR (400 MHz, *d*<sub>6</sub>-DMSO) δ: 11.83 (s, 1H, NH), 7.48 (d, *J* = 8.4 Hz, 1H, ArH), 7.40-7.29 (m, 12H, ArH), 7.22-7.15 (m, 3H, ArH), 7.10-7.04 (m, 2H, ArH), 6.85 (t, *J* = 8.0 Hz, 1H, ArH), 6.77 (t, *J* = 7.6 Hz, 1H, ArH), 6.58 (t, *J* = 7.6 Hz, 1H, ArH), 6.37 (d, *J* = 8.0 Hz, 1H, ArH), 6.20 (d, *J* = 7.6 Hz, 1H, ArH), 5.08 (d, *J* = 15.6 Hz, 1H, CH), 4.98 (d, *J* = 15.6 Hz, 1H, CH), 4.78 (d, *J* = 14.2 Hz, 1H, CH), 4.71 (d, *J* = 14.2 Hz, 1H, CH), 4.34 (s, 1H, CH), 3.80 (s, 3H, CH<sub>3</sub>); <sup>13</sup>C NMR (100 MHz, *d*<sub>6</sub>-DMSO) δ: 177.7, 176.1, 173.6, 142.5, 142.3, 141.2, 137.6, 136.7, 135.7, 129.6, 129.4, 129.1, 129.0, 128.5, 128.0, 127.8, 125.3, 124.5, 123.0, 122.3, 122.2, 121.3, 119.9, 119.8, 119.3, 118.5, 117.7, 113.3, 111.0, 110.6, 109.8, 67.0, 56.7, 56.0, 43.6, 43.2, 32.9; IR (KBr) ν: 3055, 2921, 2858, 2731, 2535, 2378, 1871, 1775, 1724, 1611, 1537, 1490, 1445, 1375, 1244, 1179, 1115, 825, 731 cm<sup>-1</sup>; MS (*m/z*): HRMS (ESI-TOF) Calcd. for C<sub>43</sub>H<sub>32</sub>NaN<sub>4</sub>O<sub>3</sub> ([M+Na]<sup>+</sup>): 675.2367, Found: 675.2359.

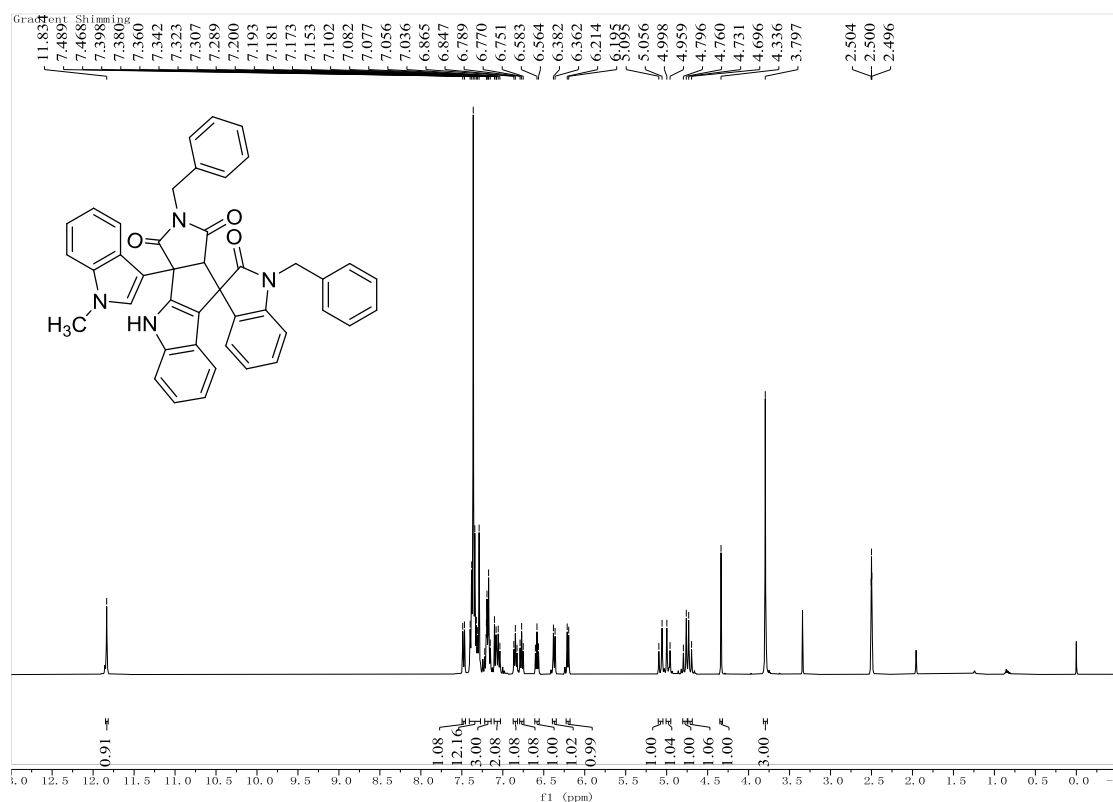

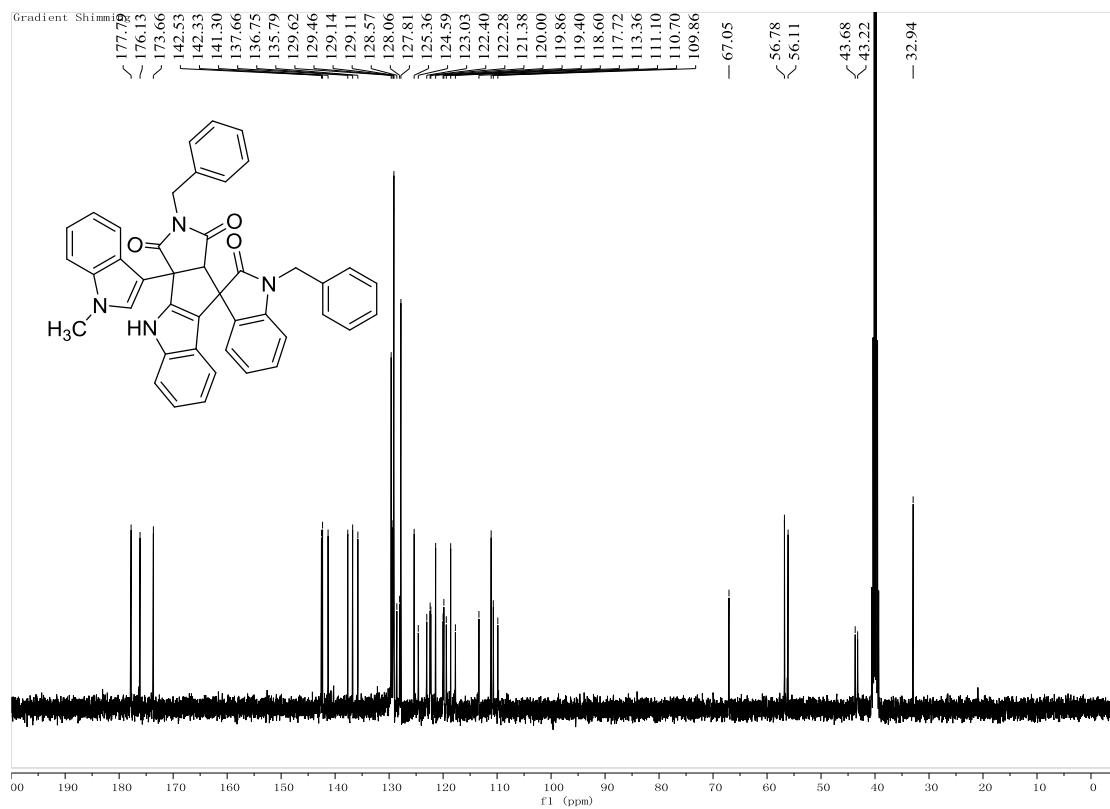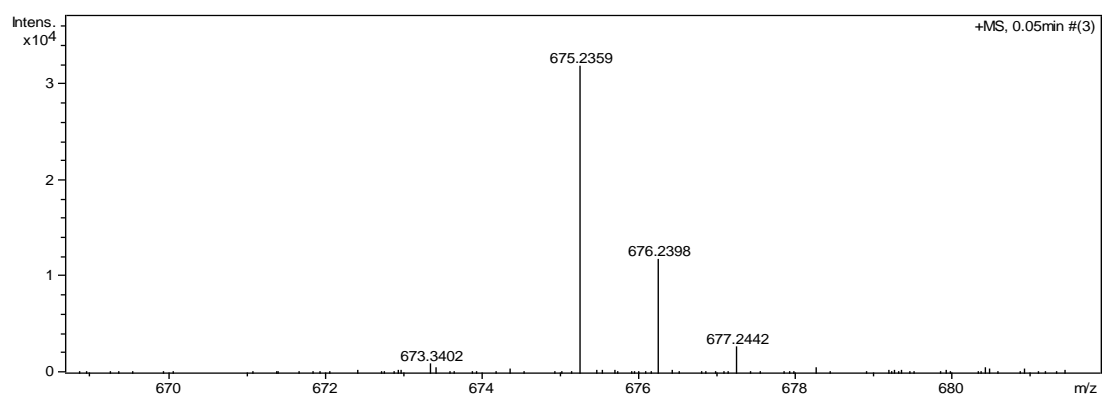

**1,2'-dibenzyl-5-methyl-3a'-(1-methyl-1*H*-indol-3-yl)-3a',9a'-dihydrospiro[indoline-3,9'-pyrrolo[3',4':4,5]cyclopenta[1,2-*b*]indole]-1',2,3'(2'*H*,4'*H*)-trione (5f):** petroleum ether and methylene dichloride (V/V = 4:1) as the eluent, white solid, 573 mg, white solid, 86%, m.p. 231-234 °C; <sup>1</sup>H NMR (400 MHz, *d*<sub>6</sub>-DMSO) δ: 11.85 (s, 1H, NH), 7.47 (d, *J* = 8.0 Hz, 1H, ArH), 7.38-7.27 (m, 11H, ArH), 7.24 (s, 1H, ArH), 7.19-7.13 (m, 2H, ArH), 7.09-7.03 (m, 2H, ArH), 6.99 (d, *J* = 8.0 Hz, 1H, ArH), 6.84 (t, *J* = 7.6 Hz, 1H, ArH), 6.79 (t, *J* = 7.6 Hz, 1H, ArH), 6.40 (d, *J* = 8.0 Hz, 1H, ArH), 6.24 (s, 1H, ArH), 5.05 (d, *J* = 15.6 Hz, 1H, CH), 4.95 (d, *J* = 15.6 Hz, 1H, CH), 4.84 (d, *J* = 14.4 Hz, 1H, CH), 4.68 (d, *J* = 14.4 Hz, 1H, CH), 4.33 (s, 1H, CH), 3.79 (s, 3H, CH<sub>3</sub>), 1.96 (s, 3H, CH<sub>3</sub>); <sup>13</sup>C NMR (100 MHz, *d*<sub>6</sub>-DMSO) δ: 177.6, 176.2, 173.7, 142.3, 141.2, 140.2, 137.6, 136.7, 135.8, 132.1, 129.6, 129.2, 129.1, 129.0, 128.4, 127.9, 127.7, 125.2, 125.1, 122.3, 122.2, 121.4, 120.0, 119.8, 119.2, 118.7, 117.8, 113.3, 111.2, 110.6, 109.7, 67.0, 56.7, 56.2, 43.6, 43.0, 32.9, 20.9; IR (KBr) ν: 3060, 2931, 2858, 2727, 2528, 2367, 1878, 1765, 1718, 1608, 1545, 1482, 1458, 1375, 1248, 1185, 1124, 825, 731 cm<sup>-1</sup>; MS (*m/z*): HRMS (ESI-TOF) Calcd. for C<sub>44</sub>H<sub>34</sub>NaN<sub>4</sub>O<sub>3</sub> ([M+Na]<sup>+</sup>): 689.2523, Found: 689.2521.

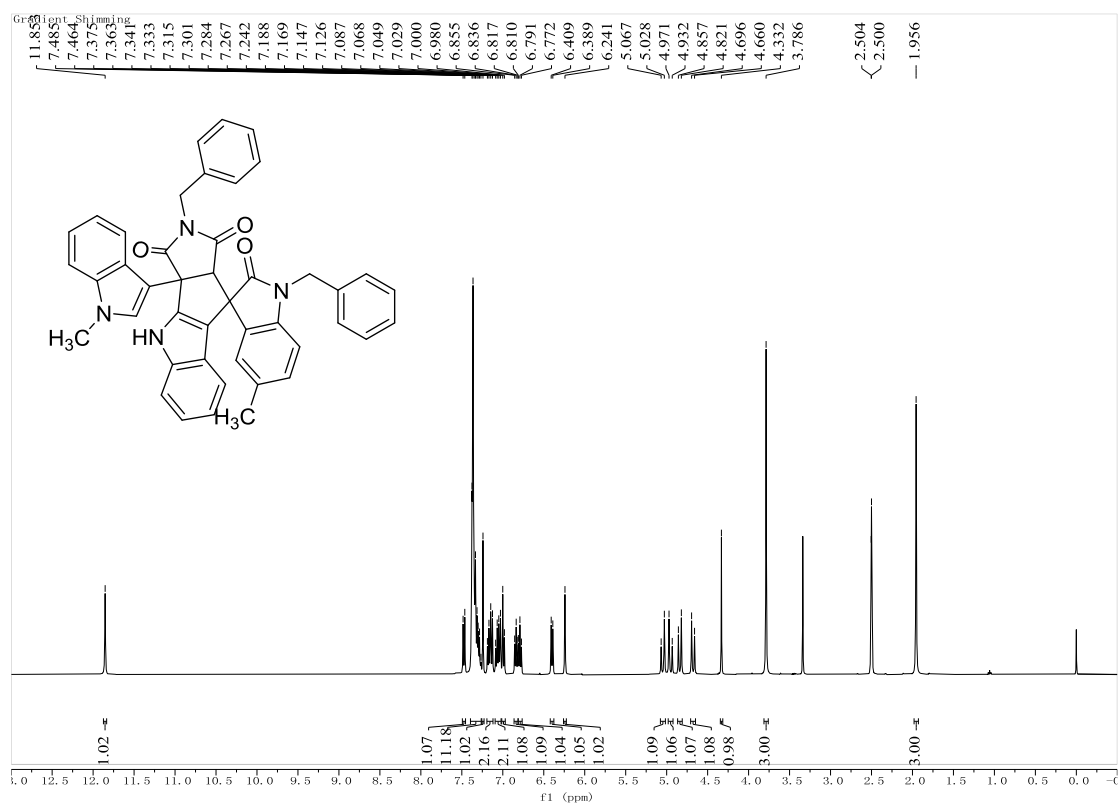

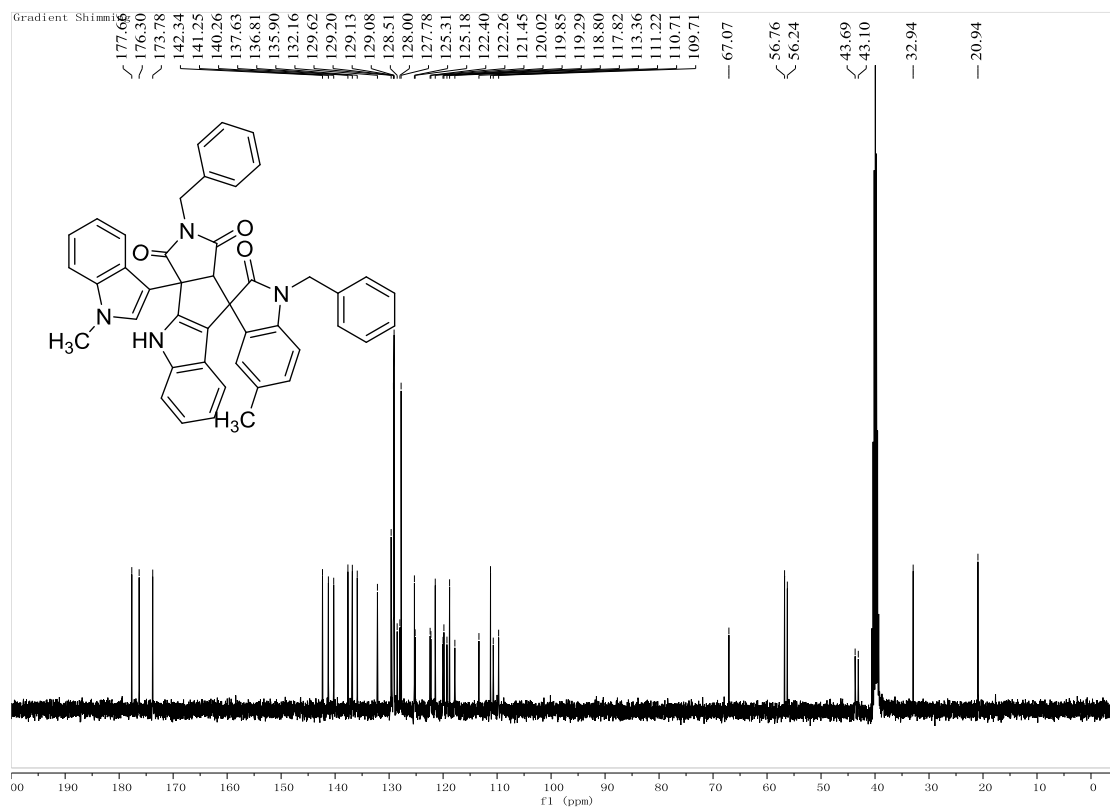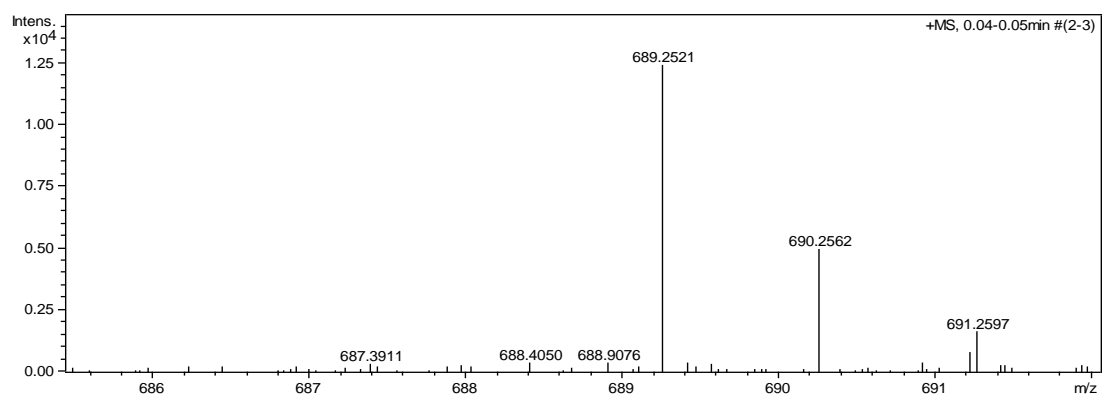

**2'-benzyl-1-butyl-5-chloro-3a'-(1-methyl-1*H*-indol-3-yl)-3a',9a'-dihydrospiro[indoline-3,9'-pyrrolo[3',4':4,5]cyclopenta[1,2-*b*]indole]-1',2,3'(2'*H*,4'*H*)-trione (5g):** petroleum ether and methylene dichloride (V/V = 4:1) as the eluent, white solid, 550 mg, white solid, 87%, m.p. >300 °C; <sup>1</sup>H NMR (400 MHz, CDCl<sub>3</sub>) δ: 8.56 (s, 1H, NH), 7.48-7.46 (m, 2H, ArH), 7.37-7.32 (m, 3H, ArH), 7.31-7.28 (m, 2H, ArH), 7.20-7.12 (m, 3H, ArH), 6.97-6.87 (m, 4H, ArH), 6.70 (d, J = 8.0 Hz, 1H, ArH), 6.51 (d, J = 2.0 Hz, 1H, ArH), 4.81 (d, J = 13.6 Hz, 1H, CH), 4.77 (d, J = 13.6 Hz, 1H, CH), 4.41 (s, 1H, CH), 3.89-3.81 (m, 1H, CH), 3.75-3.70 (m, 1H, CH), 3.67 (s, 3H, CH<sub>3</sub>); 1.77-1.69 (m, 2H, CH), 1.46-1.36 (m, 2H, CH), 0.95 (t, J = 7.2 Hz, 3H, CH); <sup>13</sup>C NMR (150 MHz, CDCl<sub>3</sub>) δ: 177.0, 176.5, 173.5, 141.6, 141.5, 141.0, 137.5, 135.0, 130.9, 129.4, 129.1, 128.9, 128.4, 128.2, 128.0, 125.3, 125.1, 122.9, 122.3, 121.8, 120.7, 120.0, 119.5, 119.0, 118.1, 112.6, 111.0, 109.6, 67.1, 56.5, 56.2, 43.2, 40.5, 32.9, 29.5, 20.2, 13.8; IR (KBr) ν: 3054, 2931, 2856, 2731, 2532, 2368, 1873, 1766, 1709, 1611, 1548, 1478, 1460, 1372, 1250, 1175, 1124, 831, 732 cm<sup>-1</sup>; MS (*m/z*): HRMS (ESI-TOF) Calcd. for C<sub>40</sub>H<sub>33</sub>ClNa<sub>4</sub>O<sub>3</sub> ([M+Na]<sup>+</sup>): 675.2133, Found: 675.2133.

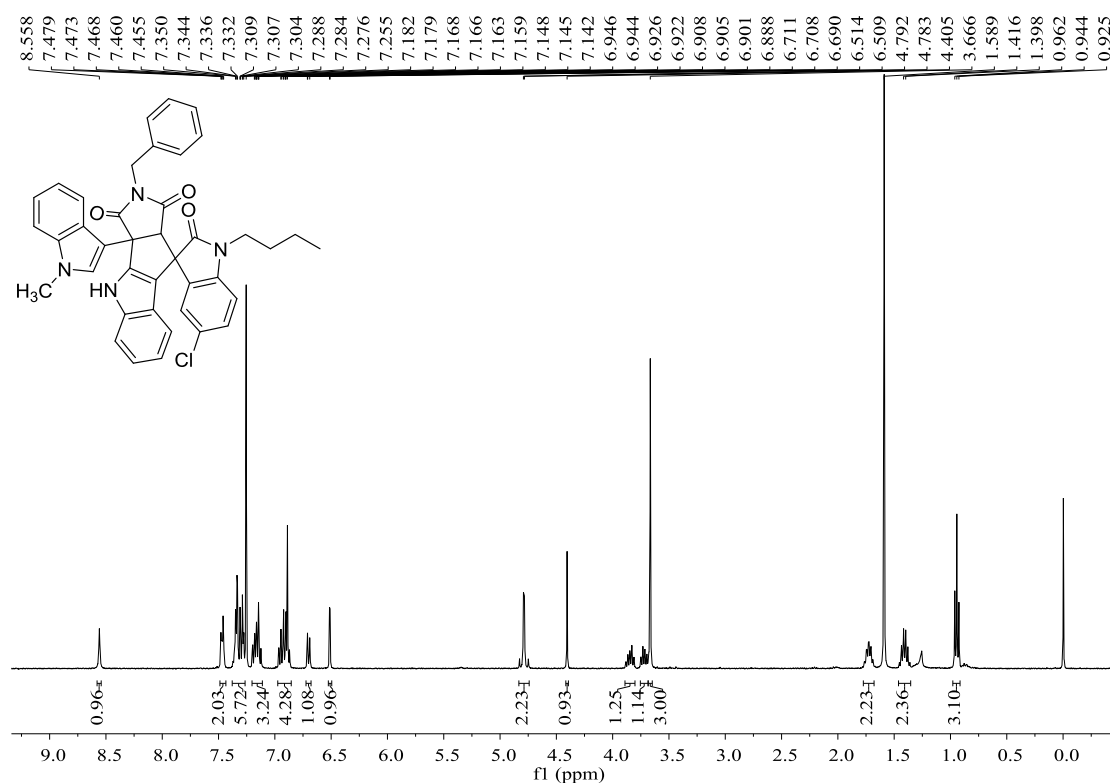

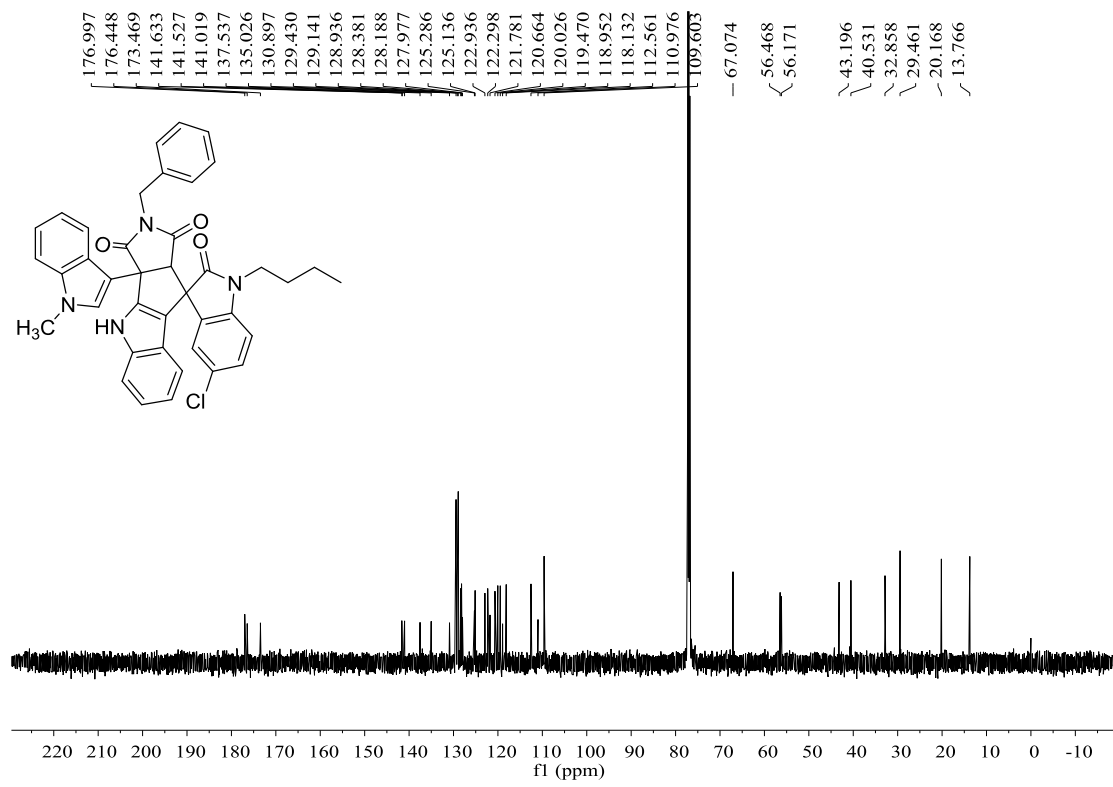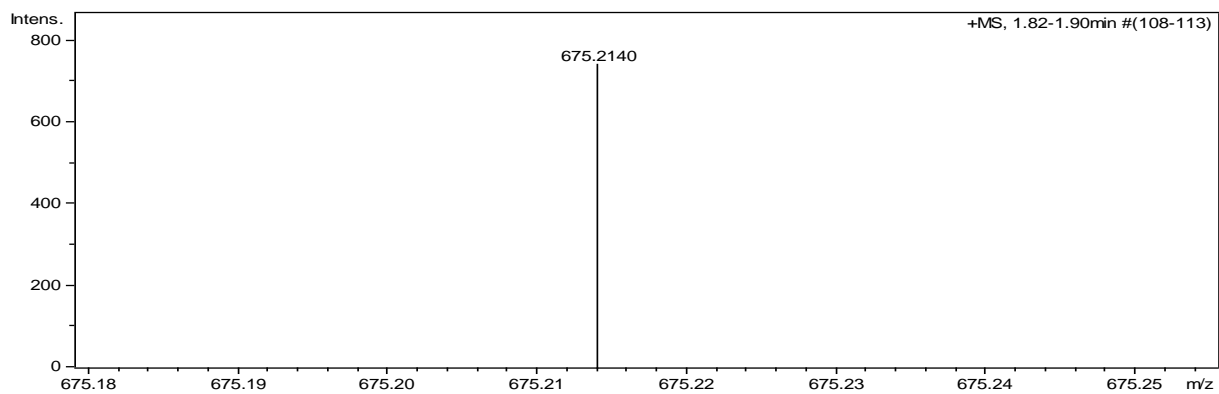

**1-benzyl-3a'-(1-methyl-1*H*-indol-3-yl)-2'-phenyl-3a',9a'-dihydrospiro[indoline-3,9'-pyrrolo[3',4':4,5]cyclopenta[1,2-*b*]indole]-1',2,3'(2'*H*,4'*H*)-trione (5h):** petroleum ether and methylene dichloride (V/V = 4:1) as the eluent, white solid, 421 mg, white solid, 66%, m.p. 231-233 °C; <sup>1</sup>H NMR (400 MHz, CDCl<sub>3</sub>) δ: 8.50 (s, 1H, NH), 7.83-7.81 (m, 1H, ArH), 7.50-7.45 (m, 2H, ArH), 7.43-7.38 (m, 3H, ArH), 7.36-7.32 (m, 5H, ArH), 7.30-7.27 (m, 3H, ArH), 7.23-7.19 (m, 2H, ArH), 7.15-7.11 (m, 2H, ArH), 6.94-6.86 (m, 4H, ArH), 6.74-6.72 (m, 1H, ArH), 5.22 (d, J = 15.6 Hz, 1H, CH), 4.91 (d, J = 15.6 Hz, 1H, CH), 4.80 (s, 1H, CH), 3.77 (s, 3H, CH<sub>3</sub>); <sup>13</sup>C NMR (100 MHz, *d*<sub>6</sub>-DMSO) δ: 177.9, 175.3, 172.8, 142.6, 142.4, 141.6, 137.8, 136.7, 132.1, 129.7, 129.6, 129.4, 129.1, 128.9, 128.0, 127.7, 127.3, 125.5, 124.6, 123.2, 122.4, 122.4, 121.4, 120.1, 119.5, 118.4, 117.9, 113.3, 110.7, 110.5, 110.1, 67.5, 56.8, 56.3, 43.7, 32.9; IR (KBr) ν: 3053, 2926, 2852, 2731, 2534, 2356, 1871, 1756, 1716, 1611, 1544, 1477, 1452, 1367, 1243, 1178, 1115, 830, 733 cm<sup>-1</sup>; MS (*m/z*): HRMS (ESI-TOF) Calcd. for C<sub>42</sub>H<sub>30</sub>NaN<sub>4</sub>O<sub>3</sub> ([M+Na]<sup>+</sup>): 661.2210, Found: 661.2217.

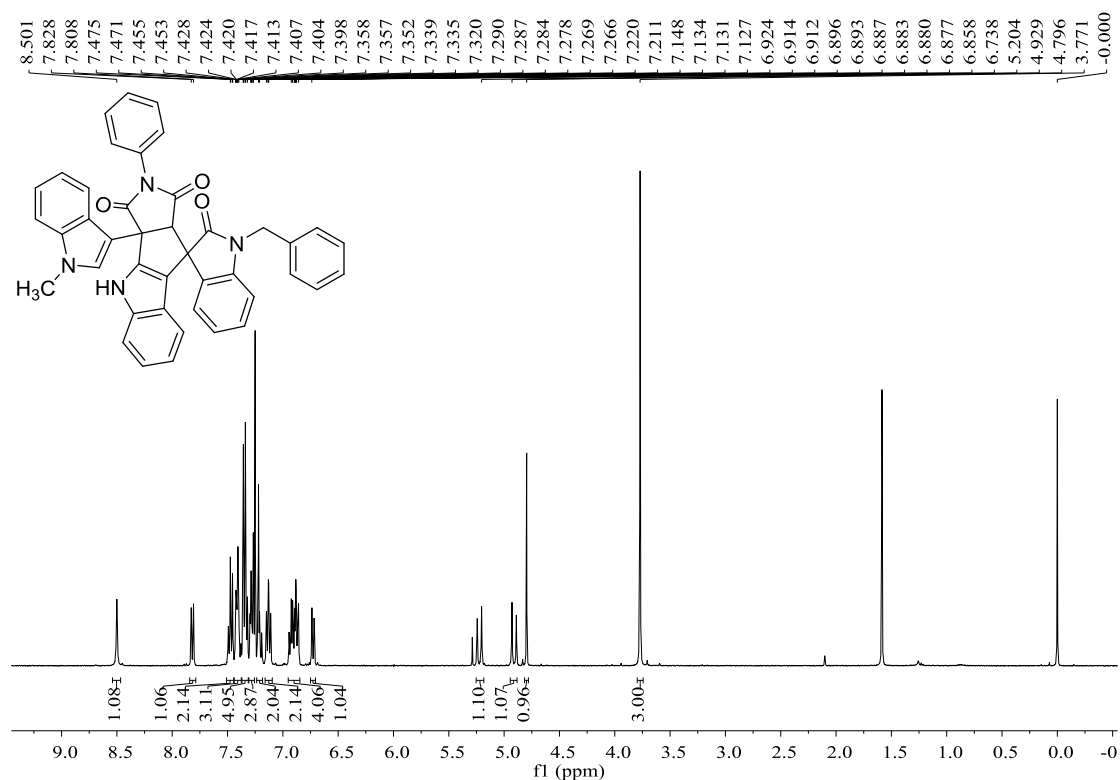



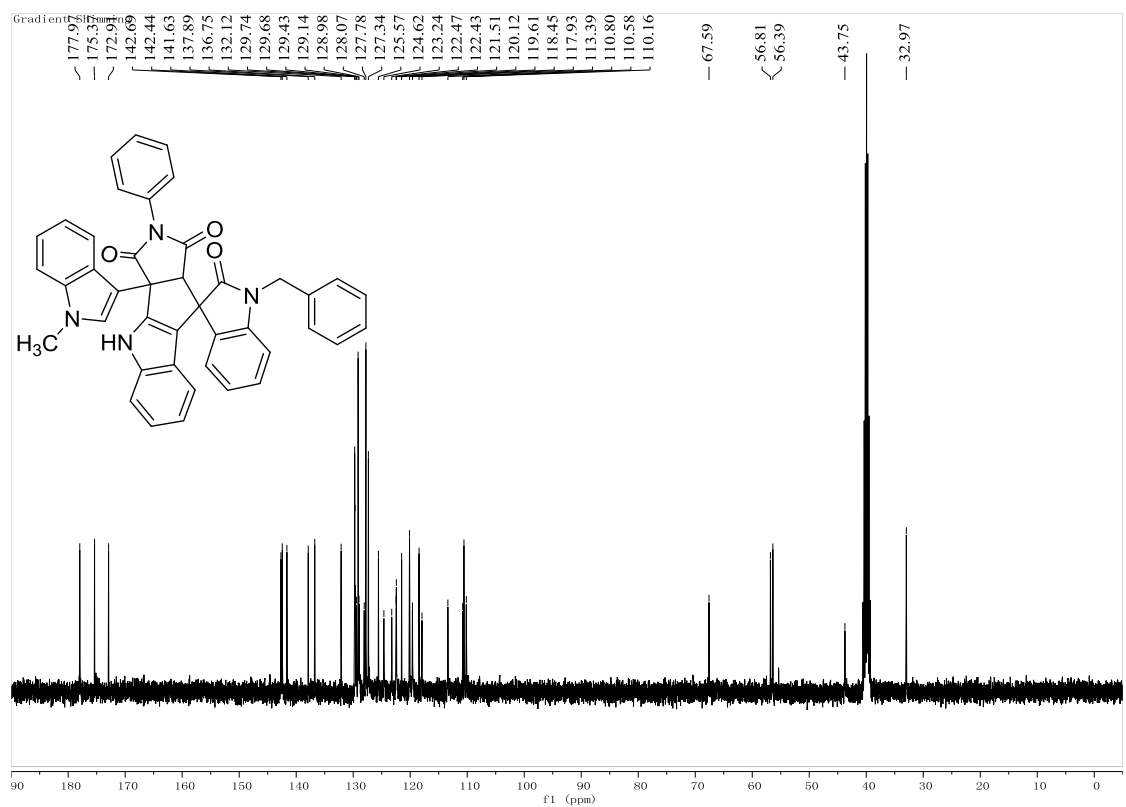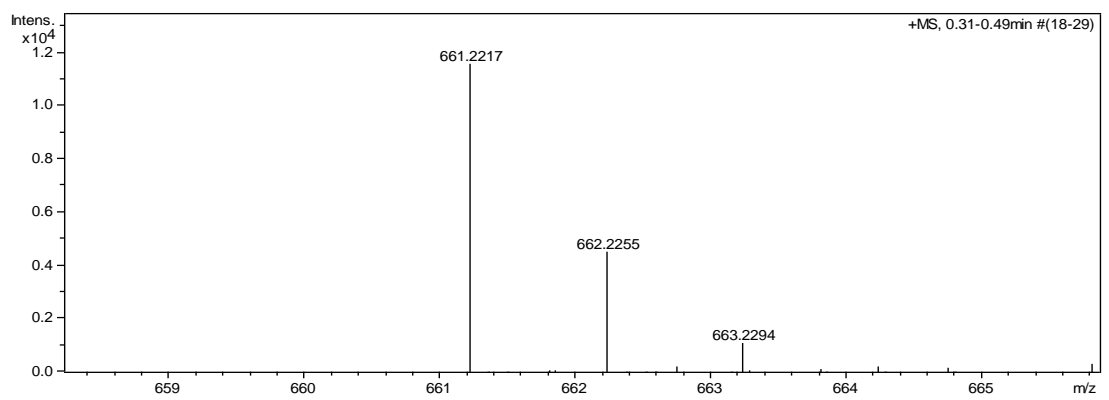

**1-benzyl-3a'-(1-methyl-1*H*-indol-3-yl)-2'-phenyl-3a',9a'-dihydrospiro[indoline-3,9'-pyrrolo[3',4':4,5]cyclopenta[1,2-*b*]indole]-1',2,3'(2'*H*,4'*H*)-trione (6h):** petroleum ether and methylene dichloride (V/V = 4:1) as the eluent, white solid, 109 mg, white solid, 17%, m.p. 236-238 °C; <sup>1</sup>H NMR (400 MHz, *d*<sub>6</sub>-DMSO) δ: 11.94 (s, 1H, NH), 7.58-7.24 (m, 15H, ArH), 7.10-6.98 (m, 6H, ArH), 6.84 (s, 1H, ArH), 6.53 (d, *J* = 6.8 Hz, 1H, ArH), 5.11-5.02 (m, 2H, CH), 4.37 (s, 1H, CH), 3.87 (s, 3H, CH<sub>3</sub>); <sup>13</sup>C NMR (100 MHz, *d*<sub>6</sub>-DMSO) δ: 176.5, 175.5, 174.8, 142.3, 142.2, 141.0, 137.7, 136.4, 132.7, 132.6, 129.6, 129.4, 129.3, 129.0, 128.9, 128.1, 128.0, 127.6, 125.4, 123.8, 123.7, 122.5, 122.3, 121.2, 120.2, 120.0, 119.2, 118.3, 117.7, 113.4, 112.0, 111.1, 110.2, 69.3, 57.5, 56.6, 43.7, 32.9; IR (KBr) ν: 3050, 2931, 2852, 2731, 2534, 2356, 1878, 1769, 1718, 1611, 1532, 1491, 1445, 1368, 1245, 1181, 1111, 821, 736 cm<sup>-1</sup>; MS (*m/z*): HRMS (ESI-TOF) Calcd. for C<sub>42</sub>H<sub>30</sub>NaN<sub>4</sub>O<sub>3</sub> ([M+Na]<sup>+</sup>): 661.2210, Found: 661.2219.

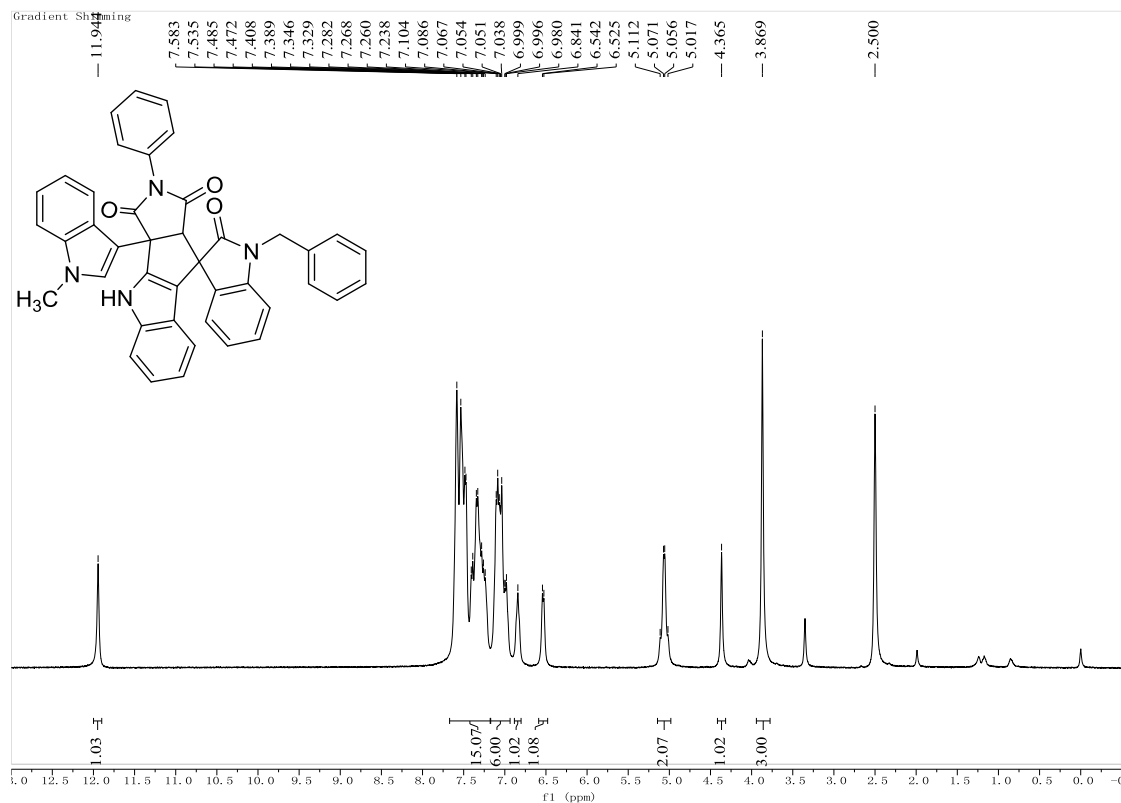

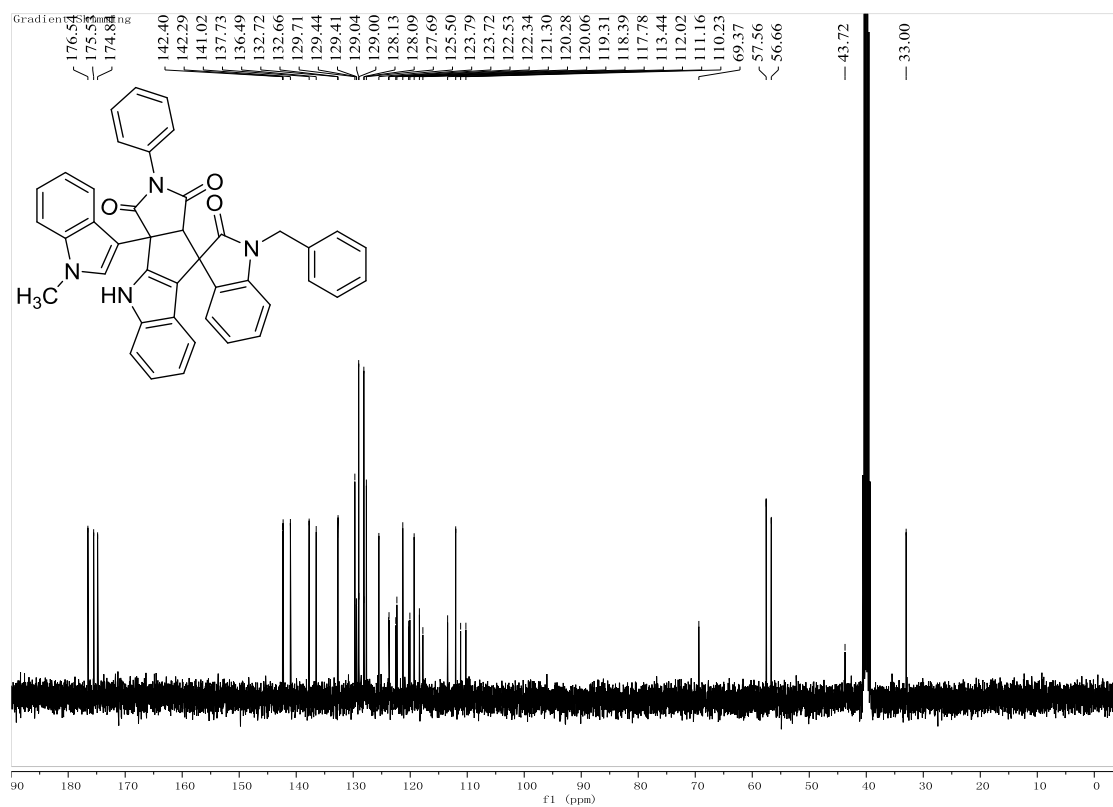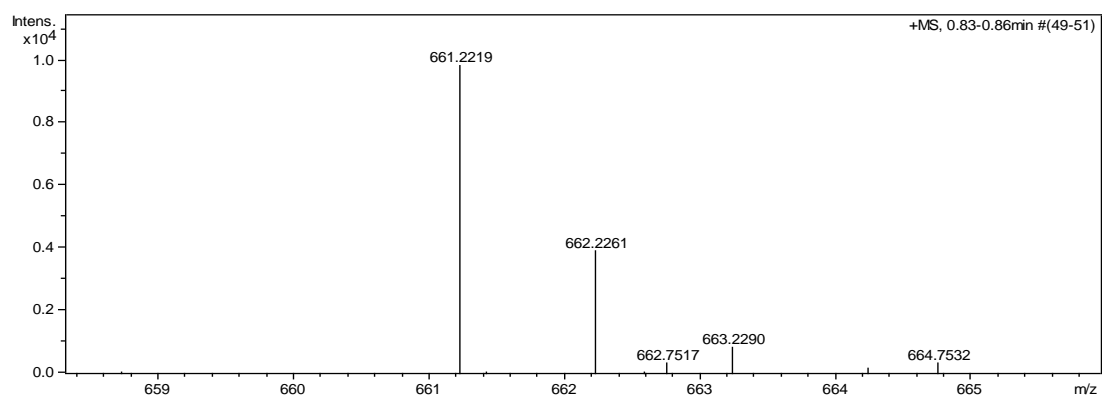

**1-benzyl-5-methyl-3a'-(1-methyl-1*H*-indol-3-yl)-2'-phenyl-3a',9a'-dihydrospiro[indoline-3,9'-pyrrolo[3',4':4,5]cyclopenta[1,2-*b*]indole]-1',2,3'(2'*H*,4'*H*)-trione (5i):** petroleum ether and methylene dichloride (V/V = 4:1) as the eluent, white solid, 437 mg, white solid, 67%, m.p. 215-217 °C; <sup>1</sup>H NMR (400 MHz, CDCl<sub>3</sub>) δ: 8.61 (s, 1H, NH), 7.77 (d, *J* = 8.4 Hz, 1H, ArH), 7.38 (t, *J* = 8.0 Hz, 2H, ArH), 7.33-7.30 (m, 3H, ArH), 7.28-7.22 (m, 5H, ArH), 7.18 (dd, *J*<sub>1</sub> = 7.2 Hz, *J*<sub>2</sub> = 4.0 Hz, 2H, ArH), 7.15-7.09 (m, 2H, ArH), 7.05-6.99 (m, 2H, ArH), 6.89 (d, *J* = 8.0 Hz, 1H, ArH), 6.83 (t, *J* = 7.2 Hz, 1H, ArH), 6.70-6.65 (m, 2H, ArH), 6.60 (s, 1H, ArH), 5.10 (d, *J* = 15.6 Hz, 1H, CH), 4.80 (d, *J* = 15.6 Hz, 1H, CH), 4.74 (s, 1H, CH), 3.60 (s, 3H, CH<sub>3</sub>), 2.01 (s, 3H, CH<sub>3</sub>); <sup>13</sup>C NMR (100 MHz, CDCl<sub>3</sub>) δ: 177.7, 175.7, 172.9, 141.7, 141.0, 140.1, 137.7, 135.8, 132.1, 131.7, 129.6, 129.2, 129.1, 128.8, 128.7, 127.7, 127.6, 127.3, 126.1, 125.5, 125.1, 122.7, 122.5, 121.9, 120.4, 120.3, 120.0, 119.5, 118.6, 112.5, 110.7, 109.6, 109.4, 67.2, 56.7, 56.5, 44.3, 32.8, 20.9; IR (KBr) ν: 3048, 2931, 2853, 2731, 2532, 2363, 1875, 1765, 1718, 1611, 1538, 1485, 1445, 1368, 1234, 1179, 1118, 831, 733 cm<sup>-1</sup>; MS (*m/z*): HRMS (ESI-TOF) Calcd. for C<sub>43</sub>H<sub>33</sub>NaN<sub>4</sub>O<sub>3</sub> ([M+H]<sup>+</sup>): 653.2547, Found: 653.2558.

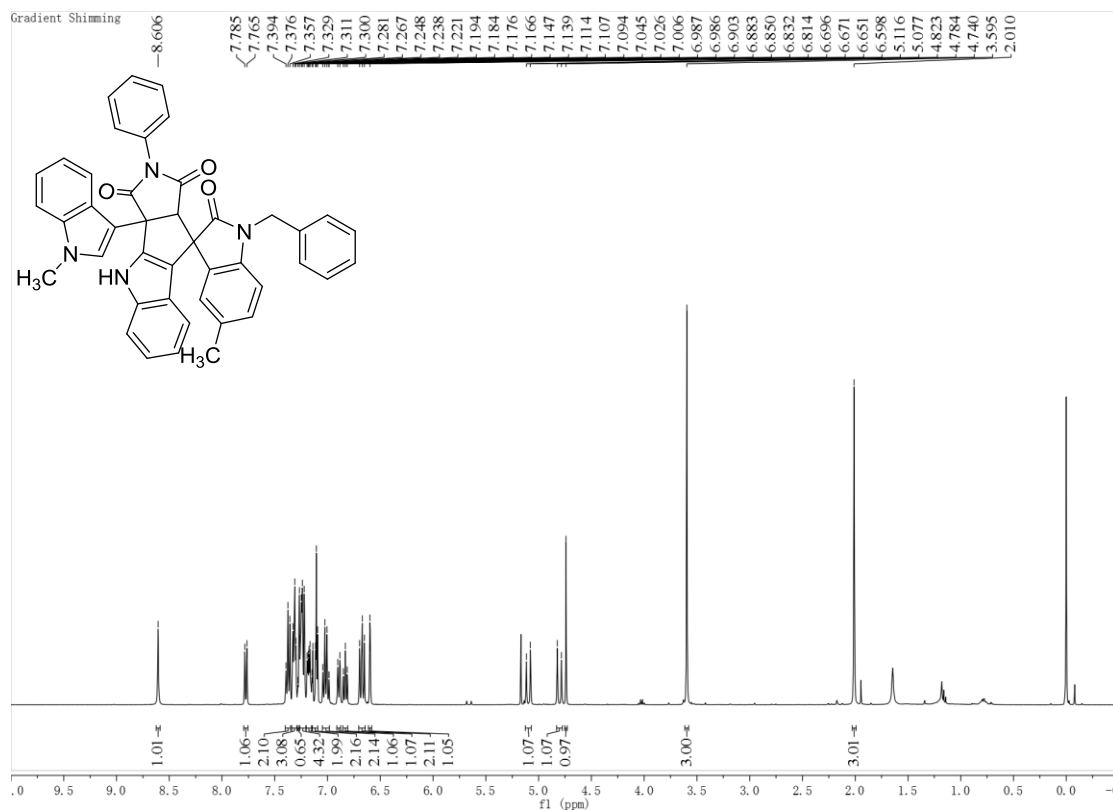

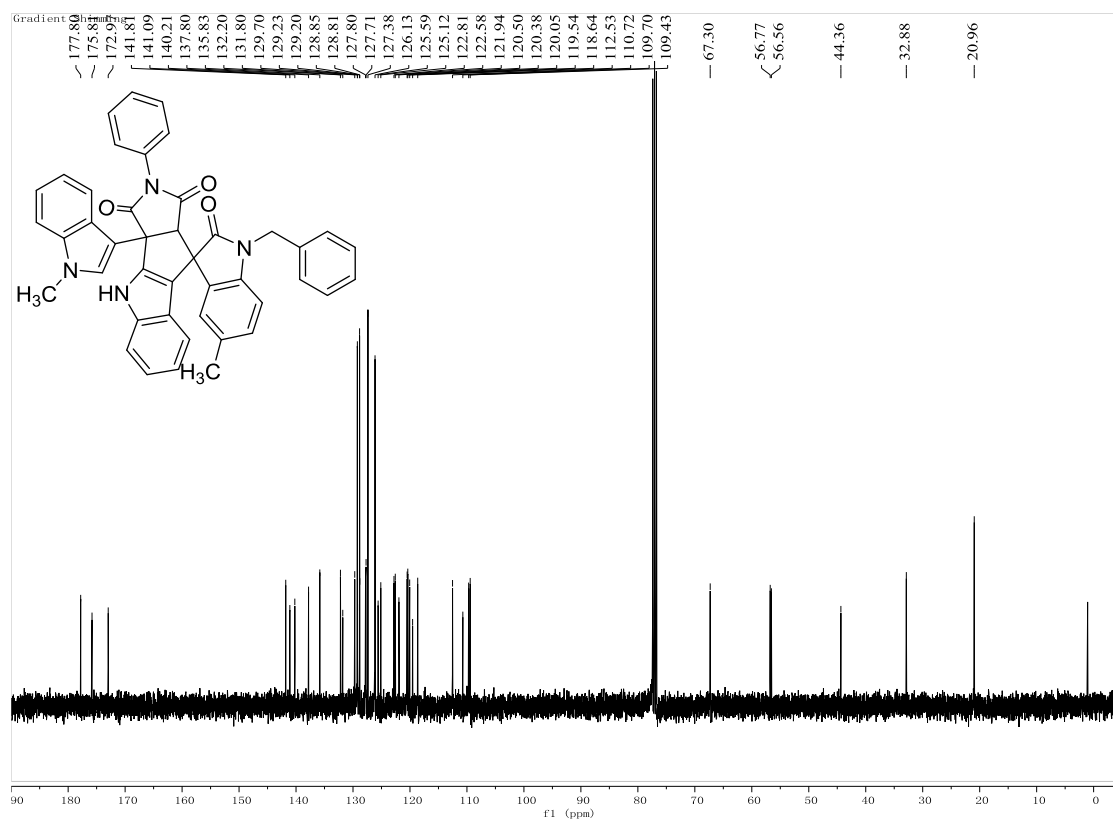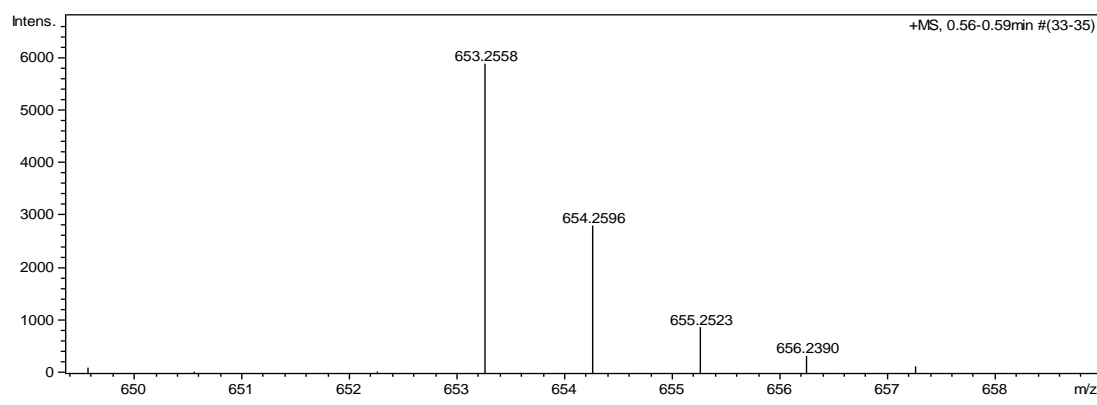

**1-benzyl-5-methyl-3a'-(1-methyl-1*H*-indol-3-yl)-2'-phenyl-3a',9a'-dihydrospiro[indoline-3,9'-pyrrolo[3',4':4,5]cyclopenta[1,2-*b*]indole]-1',2,3'(2'*H*,4'*H*)-trione (6i):** petroleum ether and methylene dichloride (V/V = 4:1) as the eluent, white solid, 104 mg, 16%, white solid, 16%, m.p. 222-225 °C; <sup>1</sup>H NMR (400 MHz, CDCl<sub>3</sub>) δ: 8.94 (s, 1H, NH), 7.58 (d, *J* = 7.6 Hz, 2H, ArH), 7.53-7.40 (m, 6H, ArH), 7.38-7.29 (m, 5H, ArH), 7.21 (s, 1H, ArH), 7.17 (d, *J* = 8.4 Hz, 1H, ArH), 7.10 (dd, *J*<sub>1</sub> = 14.4 Hz, *J*<sub>2</sub> = 7.2 Hz, 2H, ArH), 6.96 (d, *J* = 8.0 Hz, 1H, ArH), 6.89 (t, *J* = 7.6 Hz, 1H, ArH), 6.83 (s, 1H, ArH), 6.72 (dd, *J*<sub>1</sub> = 12.0 Hz, *J*<sub>2</sub> = 8.0 Hz, 2H, ArH), 5.12 (d, *J* = 15.6 Hz, 1H, CH), 4.94 (d, *J* = 15.6 Hz, 1H, CH), 4.43 (s, 1H, CH), 3.73 (s, 3H, CH<sub>3</sub>), 2.09 (s, 3H, CH<sub>3</sub>); <sup>13</sup>C NMR (100 MHz, CDCl<sub>3</sub>) δ: 176.2, 175.9, 174.9, 141.7, 139.9, 139.8, 137.7, 135.8, 132.6, 132.3, 132.2, 129.2, 129.1, 128.8, 128.7, 127.8, 127.7, 127.1, 125.3, 124.6, 122.7, 122.5, 121.6, 120.7, 120.3, 120.2, 118.7, 118.4, 112.7, 112.6, 110.1, 109.2, 68.8, 58.0, 56.4, 53.4, 44.4, 32.9, 20.9; IR (KBr) ν: 3044, 2921, 2852, 2737, 2531, 2363, 1871, 1777, 1715, 1611, 1541, 1481, 1454, 1365, 1243, 1178, 1108, 834, 732 cm<sup>-1</sup>; MS (*m/z*): HRMS (ESI-TOF) Calcd. for C<sub>43</sub>H<sub>33</sub>NaN<sub>4</sub>O<sub>3</sub> ([M+H]<sup>+</sup>): 653.2547, Found: 653.2550.

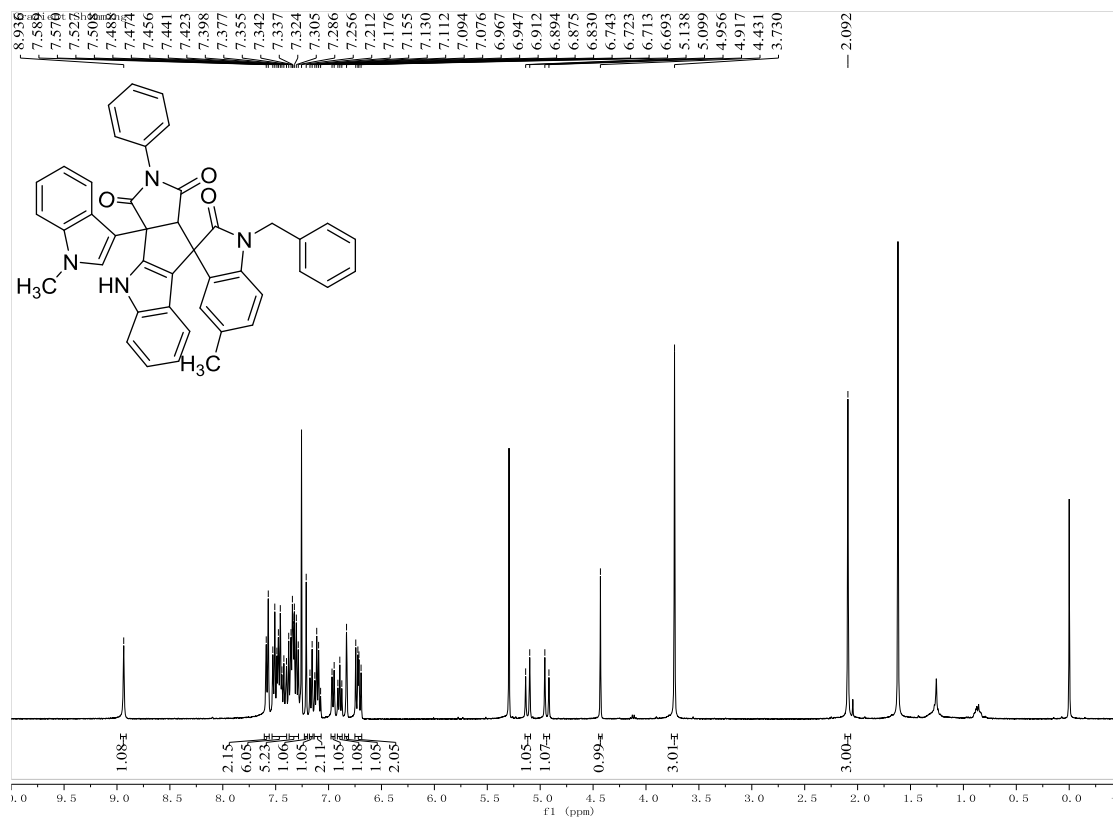

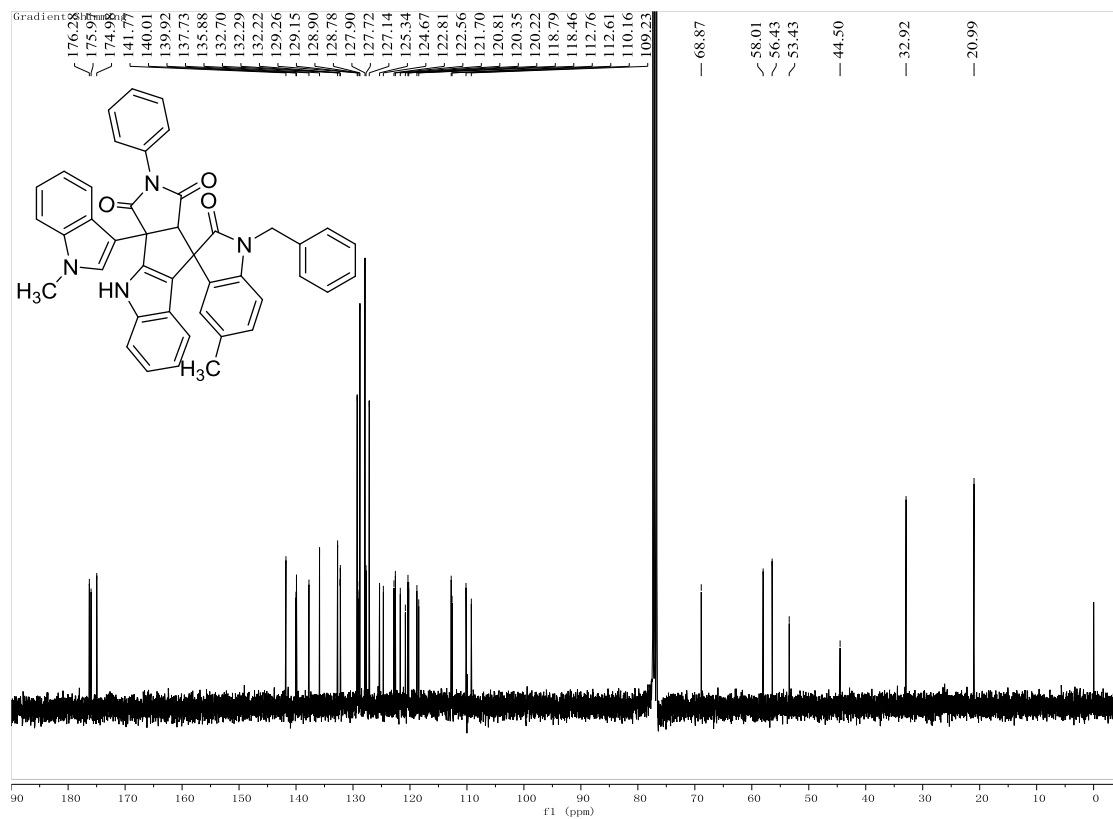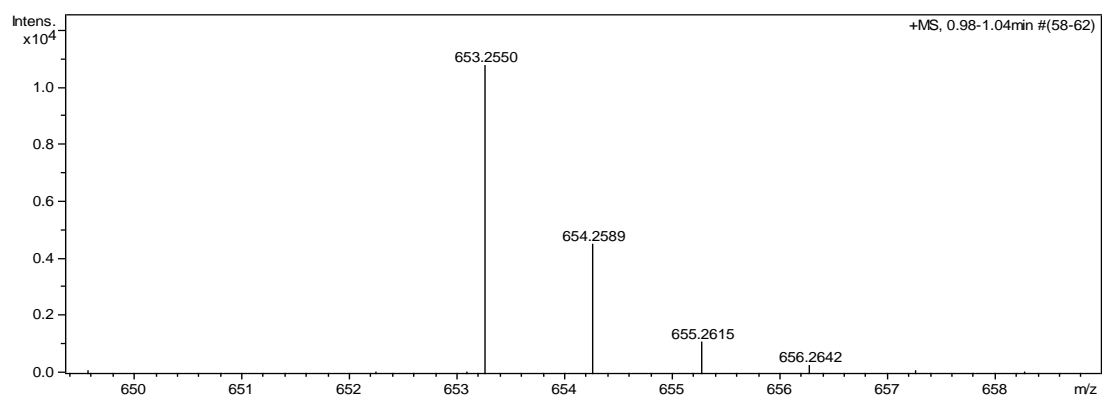

**1-benzyl-5-fluoro-3a'-(1-methyl-1*H*-indol-3-yl)-2'-phenyl-3a',9a'-dihydrospiro[indoline-3,9'-pyrrolo[3',4':4,5]cyclopenta[1,2-*b*]indole]-1',2,3'(2'*H*,4'*H*)-trione (5j):** petroleum ether and methylene dichloride (V/V = 4:1) as the eluent, white solid, 426 mg, white solid, 65%, m.p. 232-234 °C; <sup>1</sup>H NMR (400 MHz, *d*<sub>6</sub>-DMSO) δ: 11.90 (s, 1H, NH), 7.56 (t, *J* = 8.0 Hz, 4H, ArH), 7.51-7.49 (m, 2H, ArH), 7.43 (t, *J* = 6.4 Hz, 4H, ArH), 7.36 (t, *J* = 7.6 Hz, 3H, ArH), 7.31 (t, *J* = 6.8 Hz, 1H, ArH), 7.22 (t, *J* = 7.6 Hz, 1H, ArH), 7.16-7.09 (m, 3H, ArH), 7.03 (t, *J* = 7.6 Hz, 1H, ArH), 6.87 (d, *J* = 7.6 Hz, 1H, ArH), 6.78 (d, *J* = 7.6 Hz, 1H, ArH), 6.56 (d, *J* = 8.0 Hz, 1H, ArH), 5.13 (d, *J* = 16.0 Hz, 1H, CH), 5.05 (d, *J* = 16.0 Hz, 1H, CH), 4.59 (s, 1H, CH), 3.85 (s, 3H, CH<sub>3</sub>); <sup>13</sup>C NMR (100 MHz, *d*<sub>6</sub>-DMSO) δ: 177.7, 175.1, 172.7, 158.9 (d, *J* = 237.8 Hz), 142.4, 141.8, 138.9, 137.7, 136.5, 132.0, 131.5 (d, *J* = 7.5 Hz), 129.7, 129.4, 129.1, 128.0, 127.7, 127.2, 125.4, 122.5, 122.3, 121.4, 120.1 (d, *J* = 10.9 Hz), 119.4, 117.7, 116.0 (d, *J* = 24.6 Hz), 113.4, 112.5 (d, *J* = 25.6 Hz), 111.1 (d, *J* = 7.3 Hz), 110.7, 110.5, 67.4, 56.6, 56.5, 43.8, 32.9; IR (KBr) ν: 3052, 2923, 2867, 2737, 2521, 2368, 1871, 1767, 1732, 1609, 1532, 1485, 1445, 1369, 1234, 1178, 1123, 823, 744 cm<sup>-1</sup>; MS (*m/z*): HRMS (ESI-TOF) Calcd. for C<sub>42</sub>H<sub>30</sub>FN<sub>4</sub>O<sub>3</sub> ([M+H]<sup>+</sup>): 657.2296, Found: 657.2304.

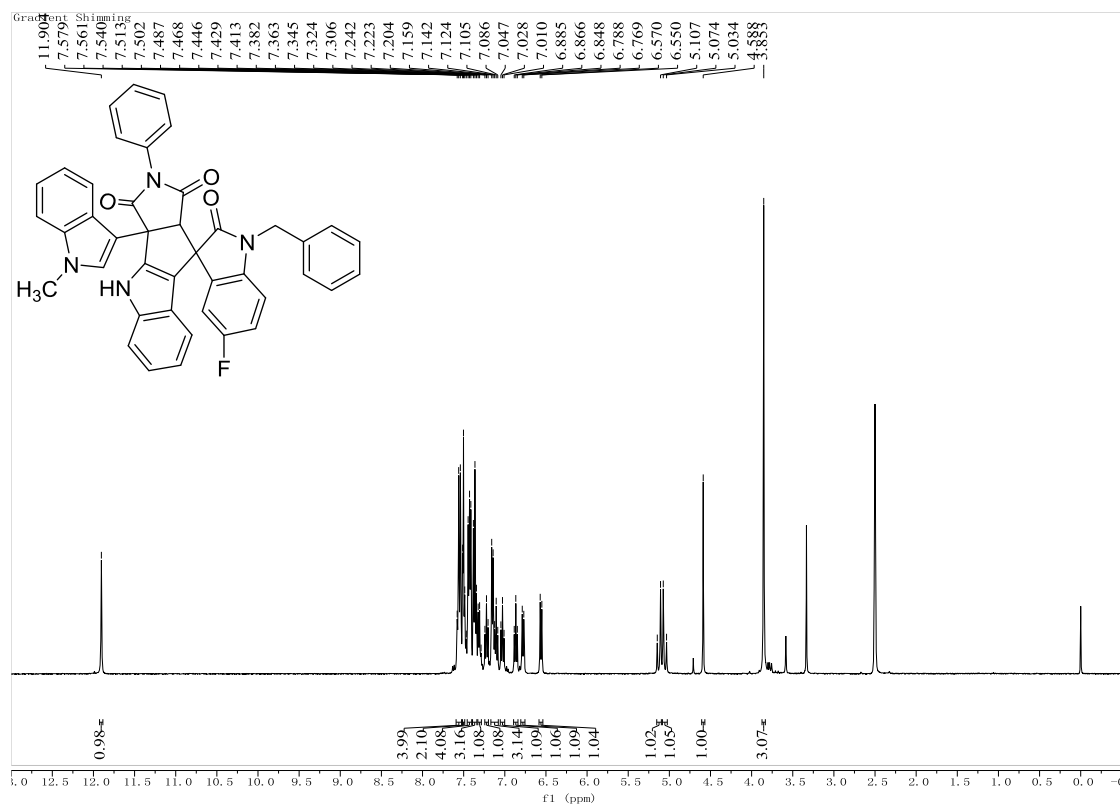



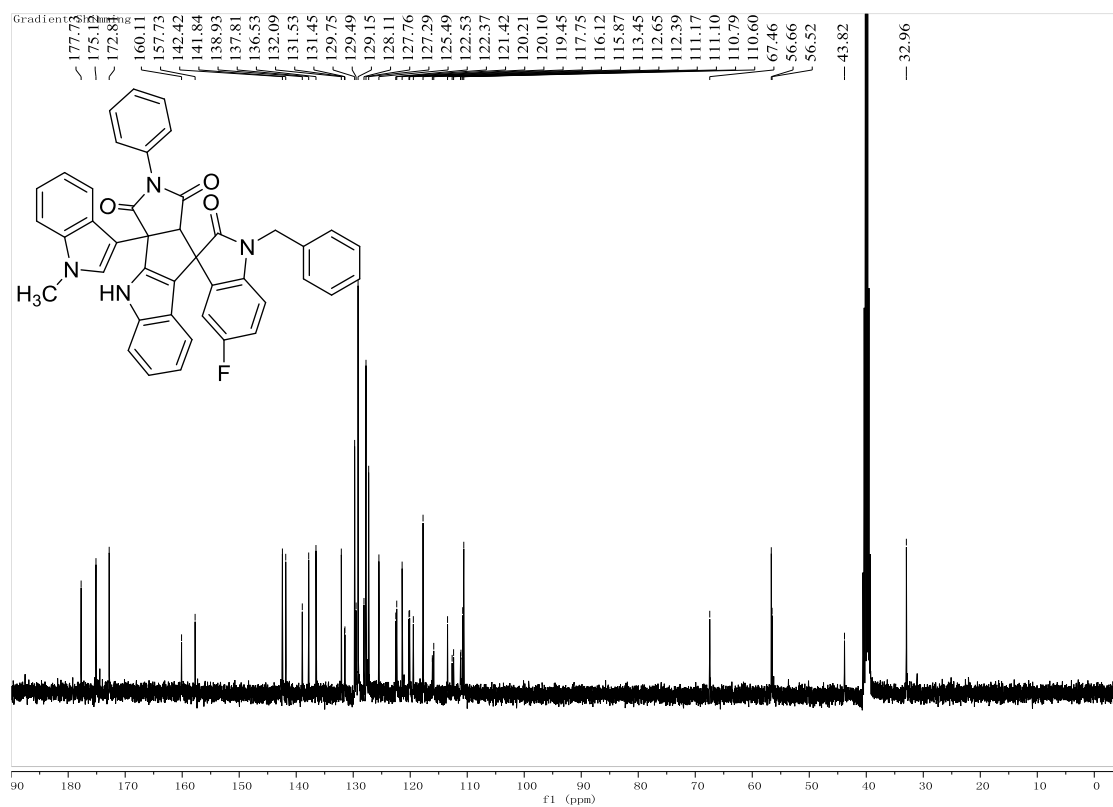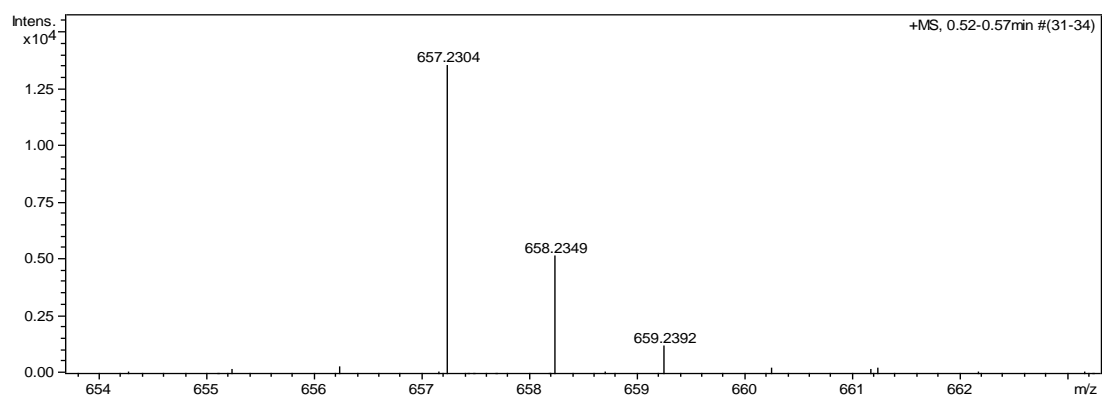

**1-benzyl-5-fluoro-3a'-(1-methyl-1*H*-indol-3-yl)-2'-phenyl-3a',9a'-dihydrospiro[indoline-3,9'-pyrrolo[3',4':4,5]cyclopenta[1,2-*b*]indole]-1',2,3'(2'*H*,4'*H*)-trione (6j):** petroleum ether and methylene dichloride (V/V = 4:1) as the eluent, white solid, 112 mg, white solid, 17%, m.p. 238-240 °C; <sup>1</sup>H NMR (600 MHz, CDCl<sub>3</sub>) δ: 8.69 (s, 1H, NH), 7.58-7.50 (m, 4H, ArH), 7.47-7.40 (m, 5H, ArH), 7.36-7.31 (m, 6H, ArH), 7.19-7.11 (m, 3H, ArH), 6.96-6.93 (m, 1H, ArH), 6.88-6.86 (m, 1H, ArH), 6.79-6.76 (m, 2H, ArH), 6.73-6.71 (m, 1H, ArH), 5.12 (d, *J* = 16.0 Hz, 1H, CH), 4.96 (d, *J* = 16.0 Hz, 1H, CH), 4.39-4.34 (m, 1H, CH), 3.82 (s, 3H, CH<sub>3</sub>); <sup>13</sup>C NMR (100 MHz, *d*<sub>6</sub>-DMSO) δ: 176.4, 175.4, 174.7, 159.2 (d, *J* = 238.3 Hz), 142.3, 141.2, 138.6 (d, *J* = 1.2 Hz), 137.7, 136.2, 134.4 (d, *J* = 7.8 Hz), 132.6, 129.7, 129.4, 129.0, 129.0, 128.1, 127.6, 127.6, 125.5, 122.6, 122.3, 121.2, 120.1, 118.8, 118.3, 117.7, 115.8 (d, *J* = 23.1 Hz), 113.5, 111.8 (d, *J* = 25.8 Hz), 111.3 (d, *J* = 7.4 Hz), 111.1, 68.9, 57.8, 56.6, 43.8, 32.9; IR (KBr) ν: 3045, 2922, 2852, 2731, 2532, 2368, 1885, 1765, 1722, 1614, 1535, 1477, 1445, 1367, 1248, 1178, 1122, 835, 721 cm<sup>-1</sup>; MS (*m/z*): HRMS (ESI-TOF) Calcd. for C<sub>42</sub>H<sub>30</sub>FN<sub>4</sub>O<sub>3</sub> ([M+H]<sup>+</sup>): 657.2296, Found: 657.2304.

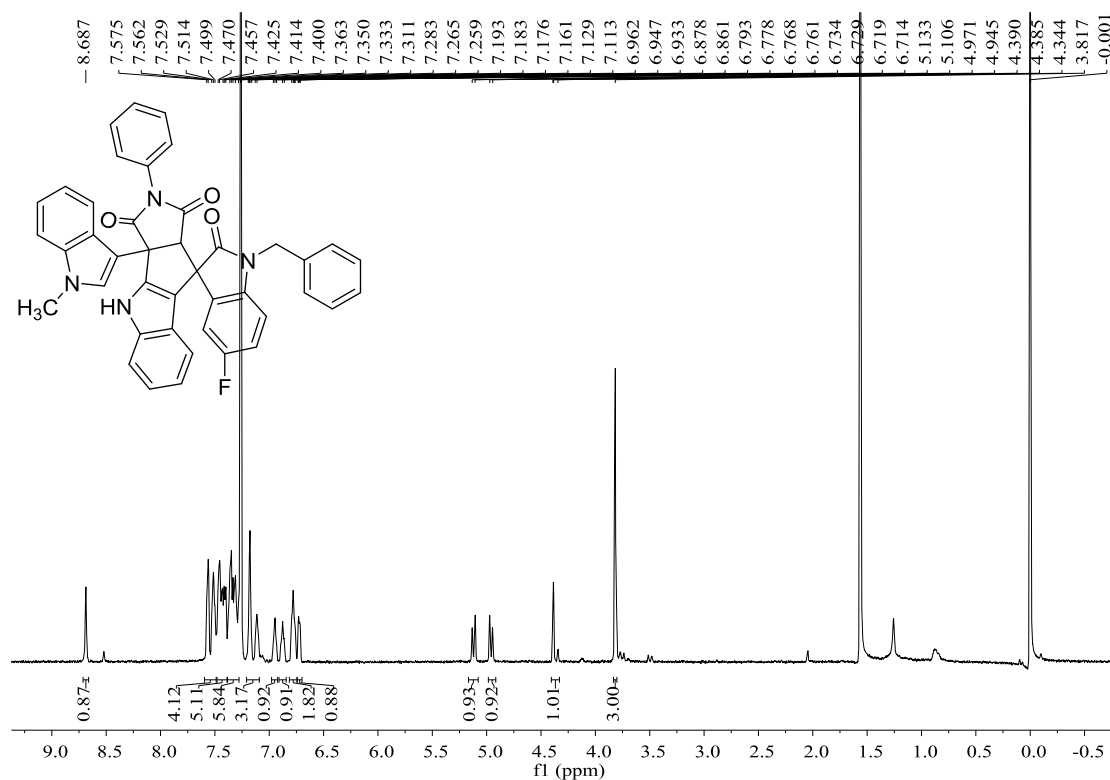

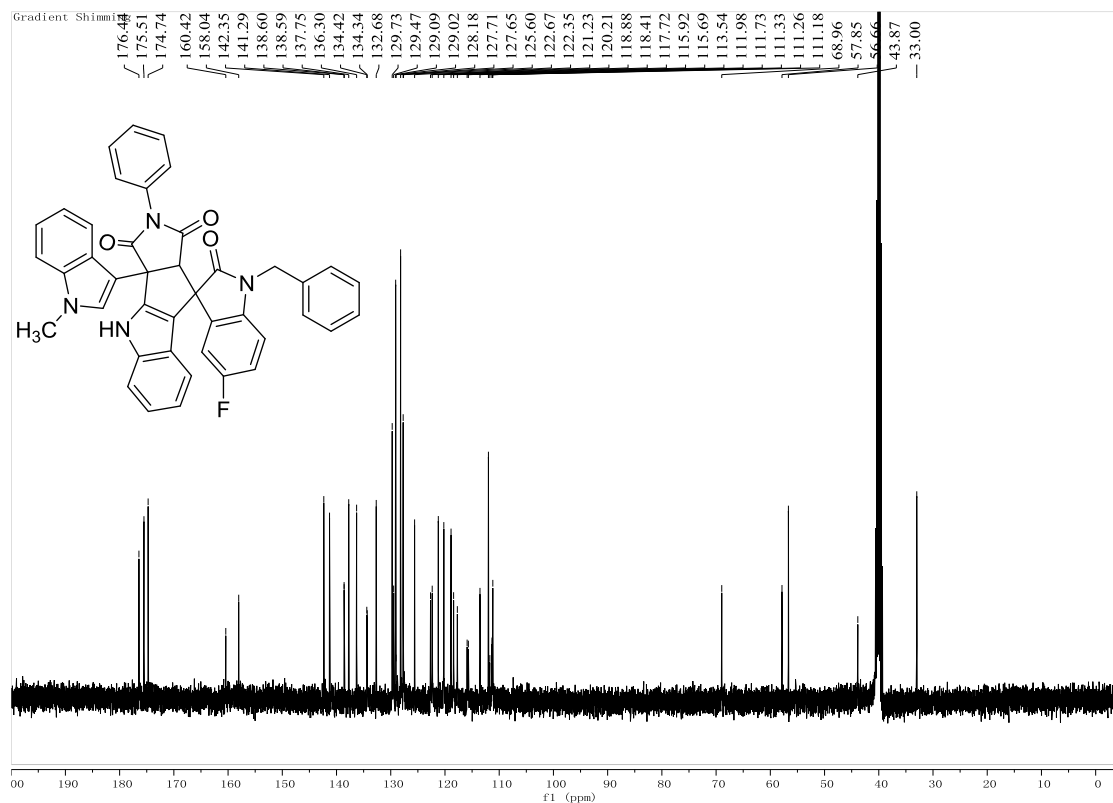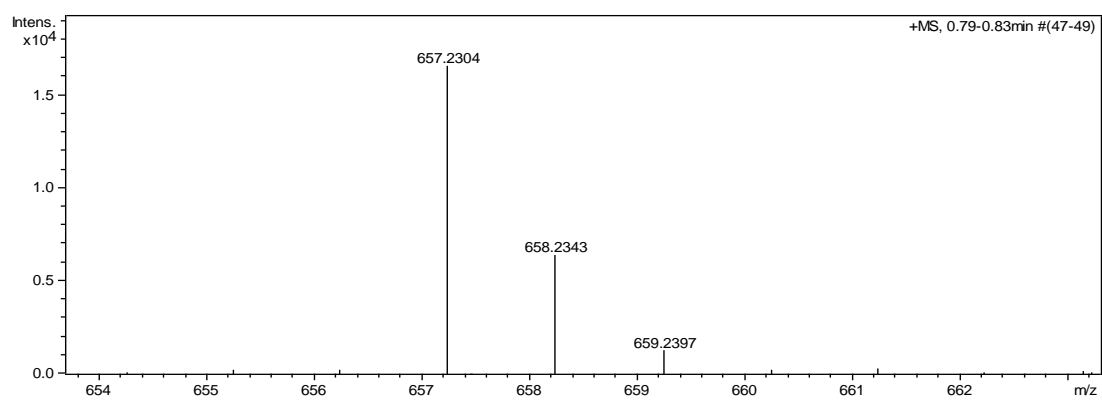

**1-butyl-5-methyl-3a'-(1-methyl-1*H*-indol-3-yl)-2'-phenyl-3a',9a'-dihydrospiro[indoline-3,9'-pyrrolo[3',4':4,5]cyclopenta[1,2-*b*]indole]-1',2,3'(2'*H*,4'*H*)-trione (5k):** petroleum ether and methylene dichloride (V/V = 4:1) as the eluent, white solid, 414 mg, white solid, 67%, m.p. 236-238 °C; <sup>1</sup>H NMR (400 MHz, *d*<sub>6</sub>-DMSO) δ: 11.78 (s, 1H, NH), 7.62 (d, *J* = 8.0 Hz, 1H, ArH), 7.58-7.46 (m, 5H, ArH), 7.39 (d, *J* = 7.6 Hz, 2H, ArH), 7.34 (t, *J* = 8.0 Hz, 1H, ArH), 7.22 (t, *J* = 7.2 Hz, 1H, ArH), 7.14 (s, 2H, ArH), 7.08 (t, *J* = 7.2 Hz, 1H, ArH), 7.00 (t, *J* = 7.2 Hz, 1H, ArH), 6.89 (t, *J* = 7.2 Hz, 1H, ArH), 6.68 (d, *J* = 12.0 Hz, 2H, ArH), 4.53 (s, 1H, CH), 3.92-3.79 (m, 2H, CH), 3.86 (s, 3H, CH<sub>3</sub>), 2.12 (s, 3H, CH<sub>3</sub>), 1.75-1.64 (m, 2H, CH), 1.42-1.37 (m, 2H, CH), 0.93 (t, *J* = 6.8 Hz, 3H, CH<sub>3</sub>); <sup>13</sup>C NMR (100 MHz, *d*<sub>6</sub>-DMSO) δ: 177.4, 175.2, 172.8, 142.3, 141.5, 140.6, 137.8, 132.0, 131.7, 130.0, 129.8, 129.6, 129.3, 128.8, 127.0, 125.5, 124.8, 122.3, 121.5, 120.1, 120.0, 119.6, 118.5, 117.7, 113.3, 110.7, 110.3, 109.5, 67.6, 56.7, 56.3, 32.9, 29.6, 20.8, 19.9, 14.1; IR (KBr) ν: 3032, 2928, 2855, 2734, 2531, 2357, 1876, 1768, 1722, 1610, 1538, 1477, 1448, 1361, 1234, 1178, 1123, 830, 721 cm<sup>-1</sup>; MS (*m/z*): HRMS (ESI-TOF) Calcd. for C<sub>40</sub>H<sub>35</sub>N<sub>4</sub>O<sub>3</sub> ([M+H]<sup>+</sup>): 619.2704, Found: 619.2717.

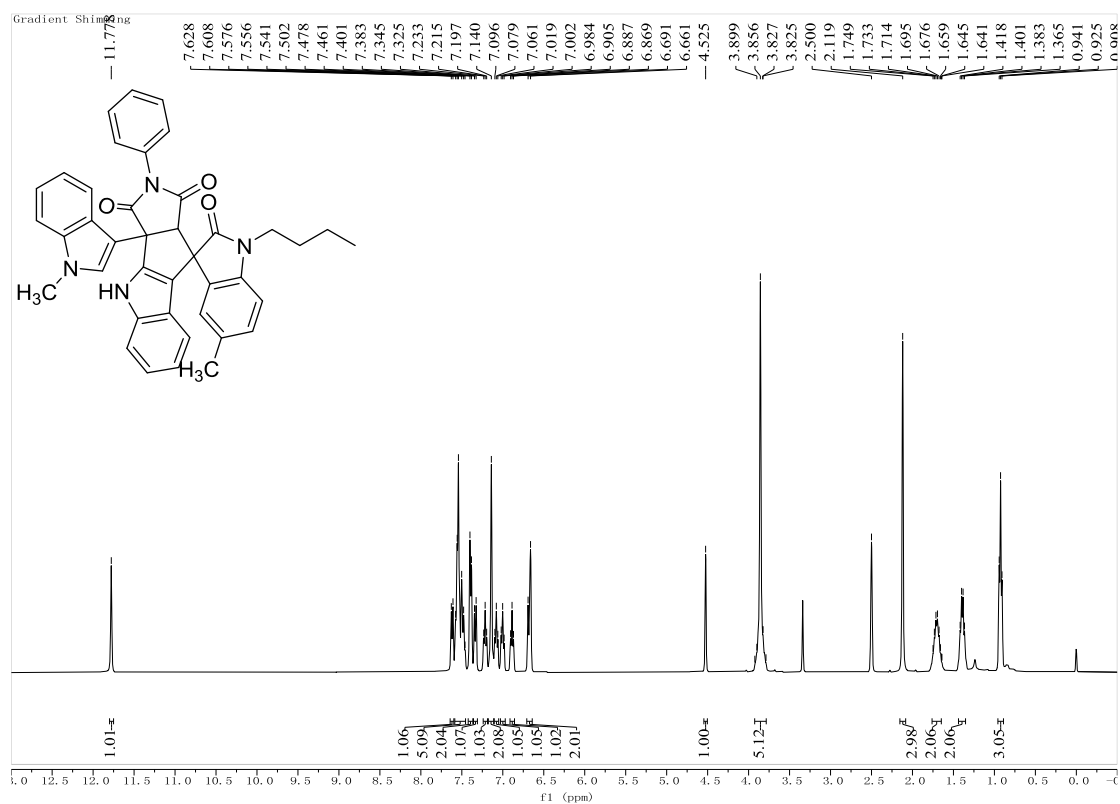

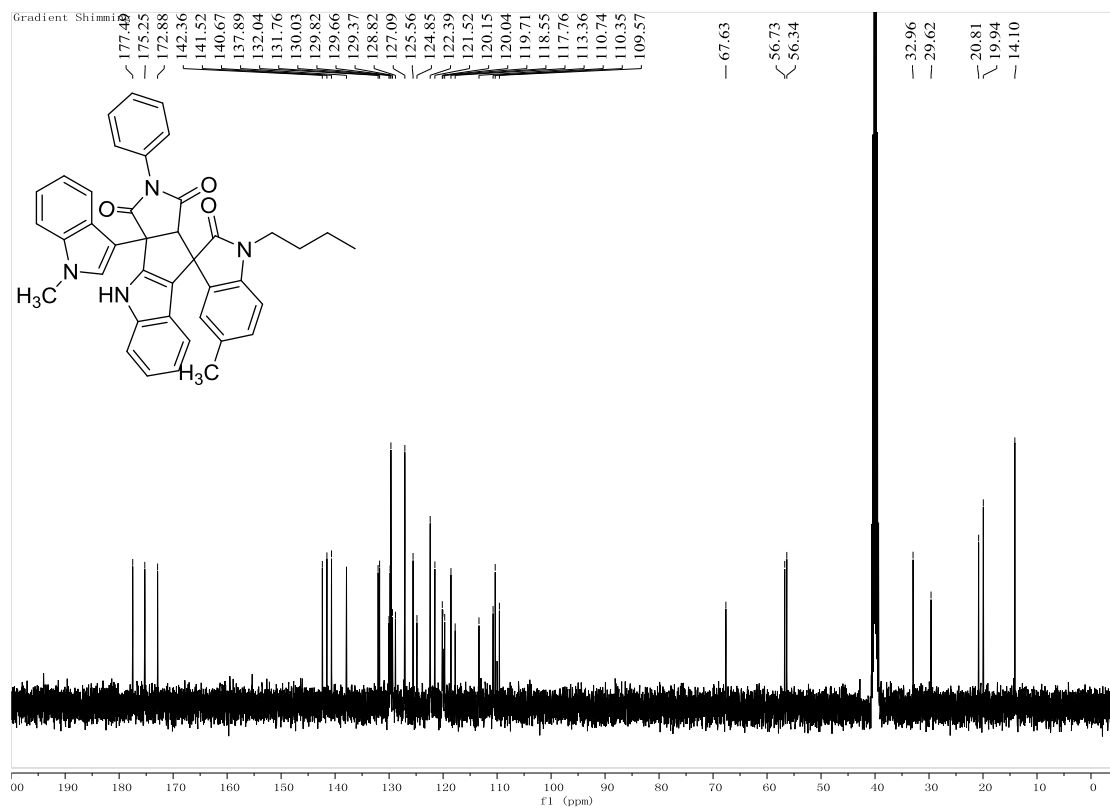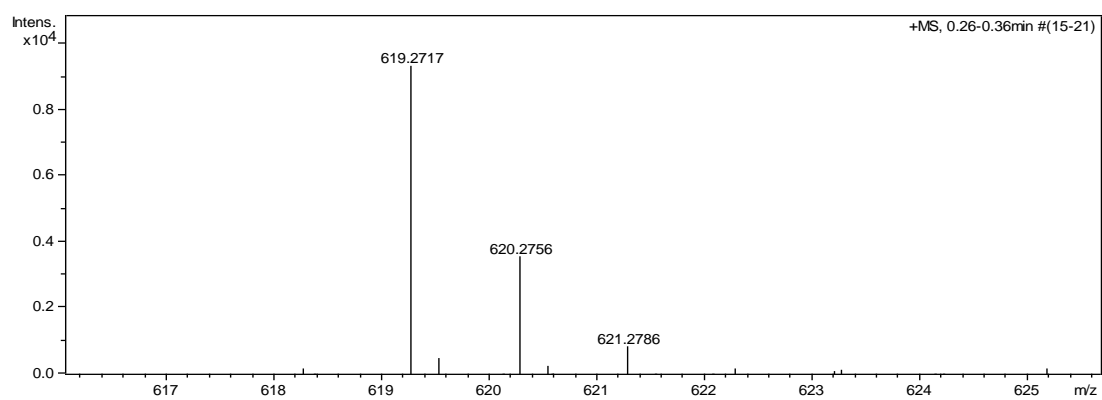

**1-butyl-5-methyl-3a'-(1-methyl-1*H*-indol-3-yl)-2'-phenyl-3a',9a'-dihydrospiro[indoline-3,9'-pyrrolo[3',4':4,5]cyclopenta[1,2-*b*]indole]-1',2,3'(2'*H*,4'*H*)-trione (6k):** petroleum ether and methylene dichloride (V/V = 4:1) as the eluent, white solid, 111 mg, white solid, 18%, m.p. 241-243 °C; <sup>1</sup>H NMR (400 MHz, *d*<sub>6</sub>-DMSO) δ: 11.89 (s, 1H, NH), 7.55 (d, *J* = 25.2 Hz, 7H, ArH), 7.40 (d, *J* = 6.0 Hz, 1H, ArH), 7.24 (s, 1H, ArH), 7.17-7.05 (m, 5H, ArH), 6.93-6.90 (m, 2H, ArH), 6.67 (d, *J* = 6.0 Hz, 1H, ArH), 4.27 (s, 1H, CH), 3.87 (s, 3H, CH<sub>3</sub>), 3.79 (d, *J* = 6.4 Hz, 2H, CH), 2.14 (s, 3H, CH<sub>3</sub>), 1.65 (d, *J* = 4.0 Hz, 1H, CH), 1.38 (d, *J* = 5.6 Hz, 1H, CH), 0.91 (s, 3H, CH<sub>3</sub>); <sup>13</sup>C NMR (100 MHz, *d*<sub>6</sub>-DMSO) δ: 176.1, 175.5, 174.7, 142.3, 140.9, 140.6, 137.7, 132.8, 132.7, 132.4, 129.7, 129.6, 129.3, 128.9, 127.6, 125.5, 124.3, 122.4, 122.3, 121.4, 120.1, 119.4, 118.5, 117.6, 113.4, 112.0, 111.1, 109.4, 69.2, 57.5, 56.6, 56.4, 32.9, 29.7, 21.0, 19.8, 14.0; IR (KBr) ν: 3051, 2927, 2852, 2732, 2531, 2364, 1878, 1764, 1723, 1611, 1537, 1487, 1445, 1368, 1242, 1182, 1118, 827, 729 cm<sup>-1</sup>; MS (*m/z*): HRMS (ESI-TOF) Calcd. for C<sub>40</sub>H<sub>35</sub>N<sub>4</sub>O<sub>3</sub> ([M+H]<sup>+</sup>): 619.2704, Found: 619.2717.

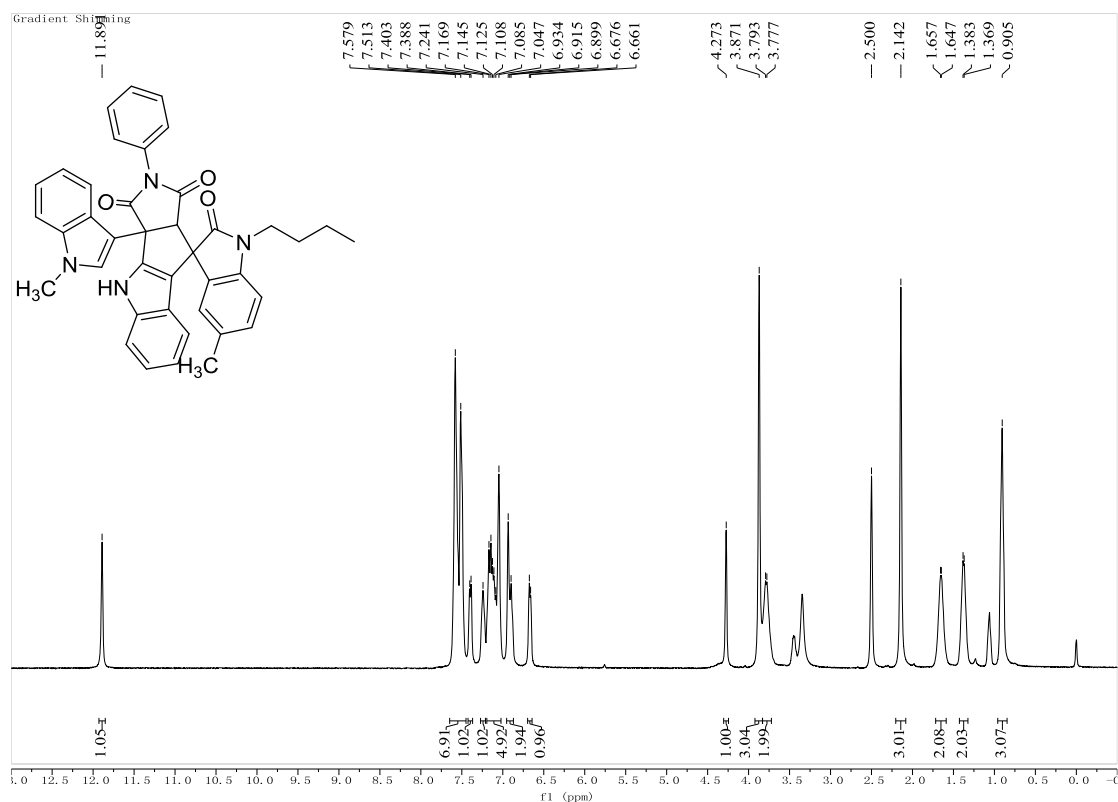

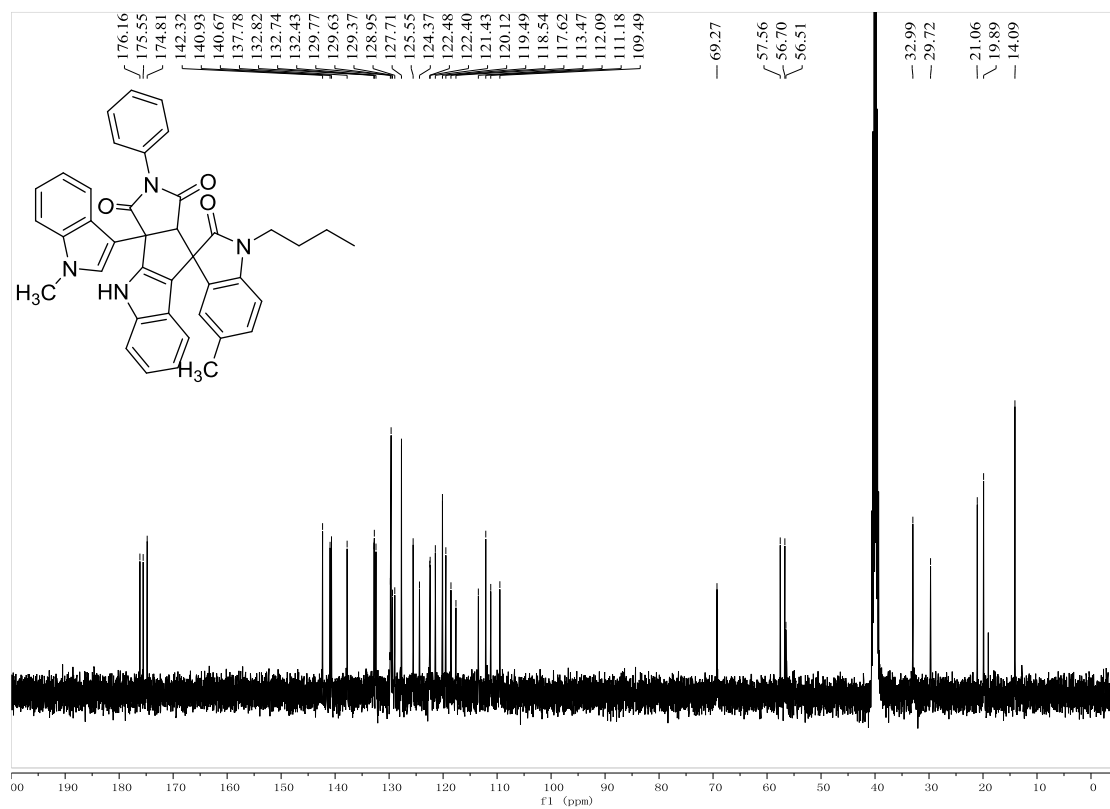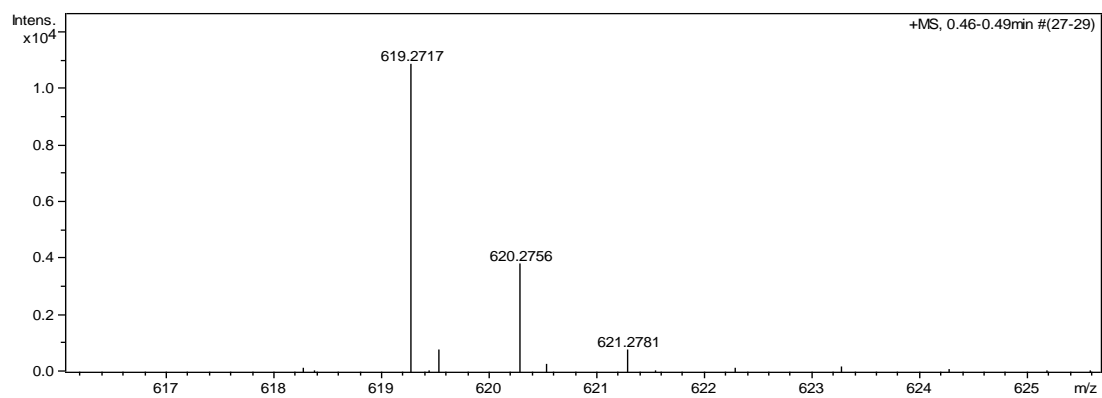

**2'-methyl-3a'-(1-methyl-1*H*-indol-3-yl)-3a',9a'-dihydrospiro[indene-2,9'-**

**pyrrolo[3',4':4,5]cyclopenta[1,2-*b*]indole]-1,1',3,3'(2'*H*,4'*H*)-tetraone (8a):** petroleum ether and methylene dichloride (V/V = 4:1) as the eluent, yellow solid, 379 mg, yellow solid, 76%, m.p. 212-215 °C; <sup>1</sup>H NMR (400 MHz, *d*<sub>6</sub>-DMSO) δ: 11.95 (s, 1H, NH), 8.19 (d, *J* = 8.8 Hz, 4H, ArH), 7.50 (d, *J* = 8.0 Hz, 1H, ArH), 7.39-7.35 (m, 2H, ArH), 7.24-7.18 (m, 2H, ArH), 7.08 (t, *J* = 6.8 Hz, 1H, ArH), 6.99 (t, *J* = 6.8 Hz, 1H, ArH), 6.82 (t, *J* = 6.8 Hz, 1H, ArH), 6.36 (d, *J* = 7.6 Hz, 1H, ArH), 4.43 (s, 1H, CH), 3.82 (s, 3H, CH<sub>3</sub>), 3.11 (s, 3H, CH<sub>3</sub>); <sup>13</sup>C NMR (100 MHz, *d*<sub>6</sub>-DMSO) δ: 199.7, 199.3, 176.0, 175.0, 142.3, 141.9, 141.3, 140.9, 138.2, 138.1, 137.6, 128.9, 125.4, 124.5, 124.2, 122.5, 122.2, 121.1, 120.4, 119.9, 119.2, 117.1, 116.4, 113.5, 110.7, 110.7, 64.4, 62.7, 56.5, 32.9, 25.7; IR (KBr) ν: 3056, 2933, 2823, 2675, 1929, 1709, 1600, 1548, 1473, 1427, 1396, 1185, 1340, 1248, 1133, 1049, 982, 926, 857, 760 cm<sup>-1</sup>; MS (*m/z*): HRMS (ESI-TOF) Calcd. for C<sub>31</sub>H<sub>21</sub>NaN<sub>3</sub>O<sub>4</sub> ([M+Na]<sup>+</sup>): 522.1424, Found: 522.1415.

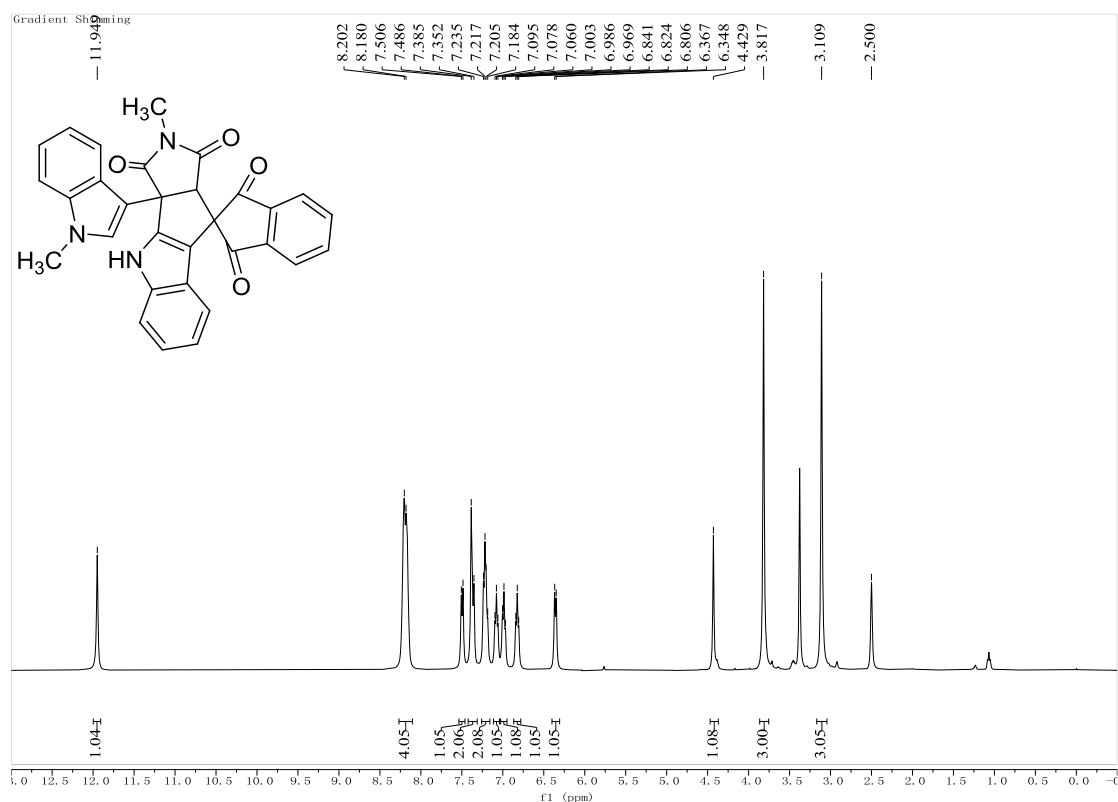



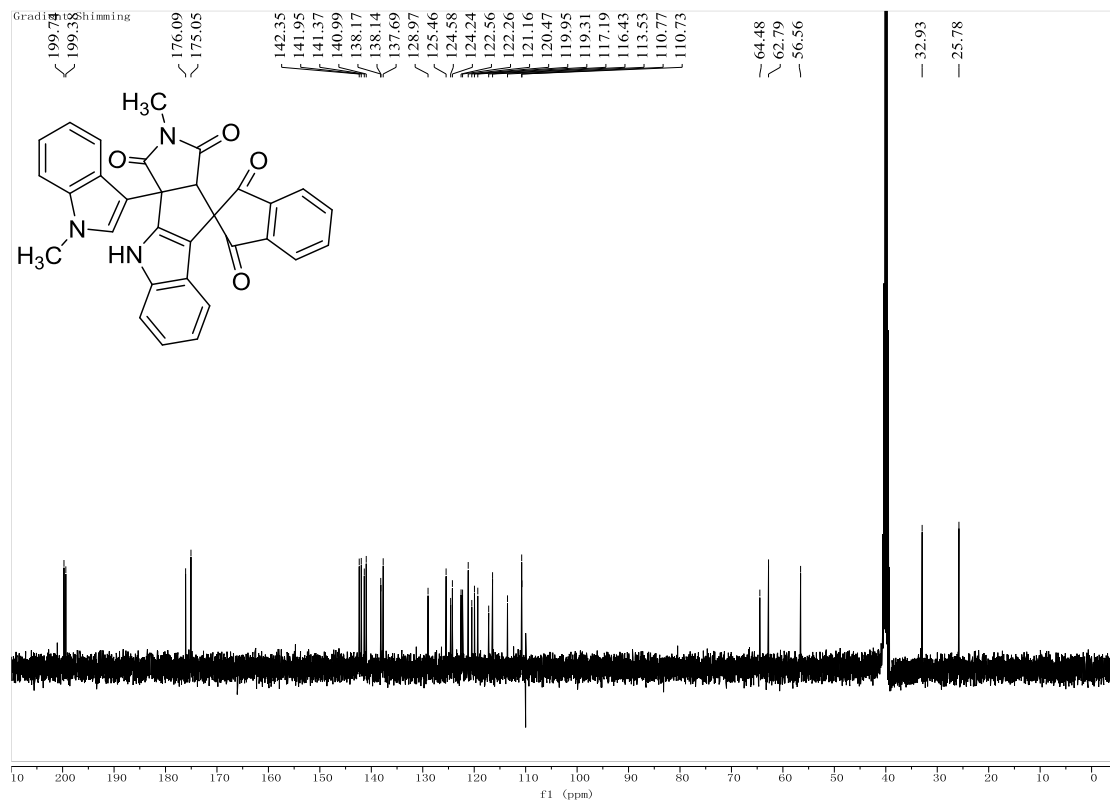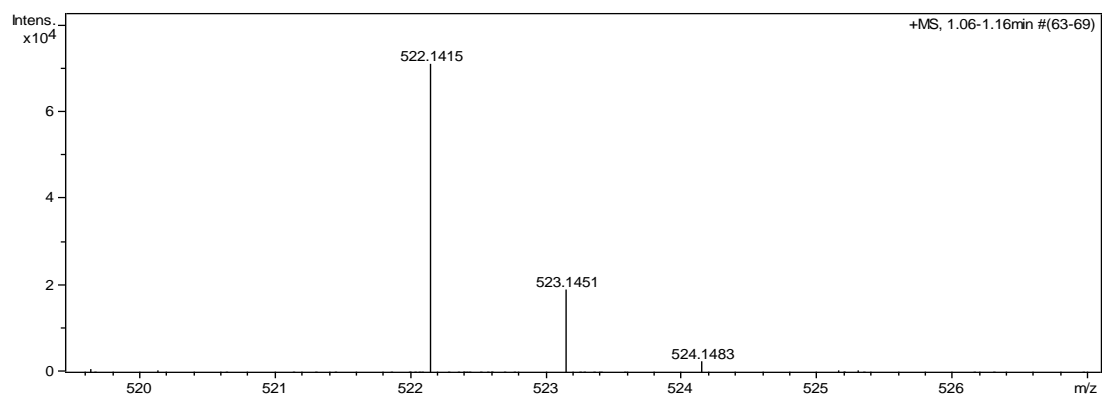

**2',8'-dimethyl-8',14'-dihydro-1'H-spiro[indene-2,9'-pyrrolo[3',4':6,7]cyclohepta[1,2-b:4,5-b']diindole]-1,1',3,3'(2'H)-tetraone (9a)**: petroleum ether and methylene dichloride (V/V = 4:1) as the eluent, red solid, 90 mg, red solid, 18%, m.p. 238-240 °C; <sup>1</sup>H NMR (400 MHz, CDCl<sub>3</sub>) δ: 10.22 (s, 1H, NH), 8.35-8.33 (m, 1H, ArH), 8.23 (q, *J* = 2.8 Hz, 2H, ArH), 8.00 (q, *J* = 2.8 Hz, 2H, ArH), 7.37 (q, *J* = 8.0 Hz, 1H, ArH), 7.31-7.24 (m, 3H, ArH), 7.22 (d, *J* = 8.8 Hz, 1H, ArH), 7.13 (t, *J* = 7.2 Hz, 1H, ArH), 6.90-6.85 (m, 1H, ArH), 3.52 (s, 3H, CH<sub>3</sub>), 3.26 (s, 3H, CH<sub>3</sub>); IR (KBr) ν: 3051, 2939, 2849, 2352, 1751, 1694, 1612, 1542, 1485, 1394, 1384, 1246, 1321, 1168, 1098, 1060, 1016, 998, 852, 798, 736 cm<sup>-1</sup>; MS (*m/z*): HRMS (ESI-TOF) Calcd. for C<sub>31</sub>H<sub>19</sub>NaN<sub>3</sub>O<sub>4</sub> ([M+Na]<sup>+</sup>): 520.1268, Found: 520.1264.

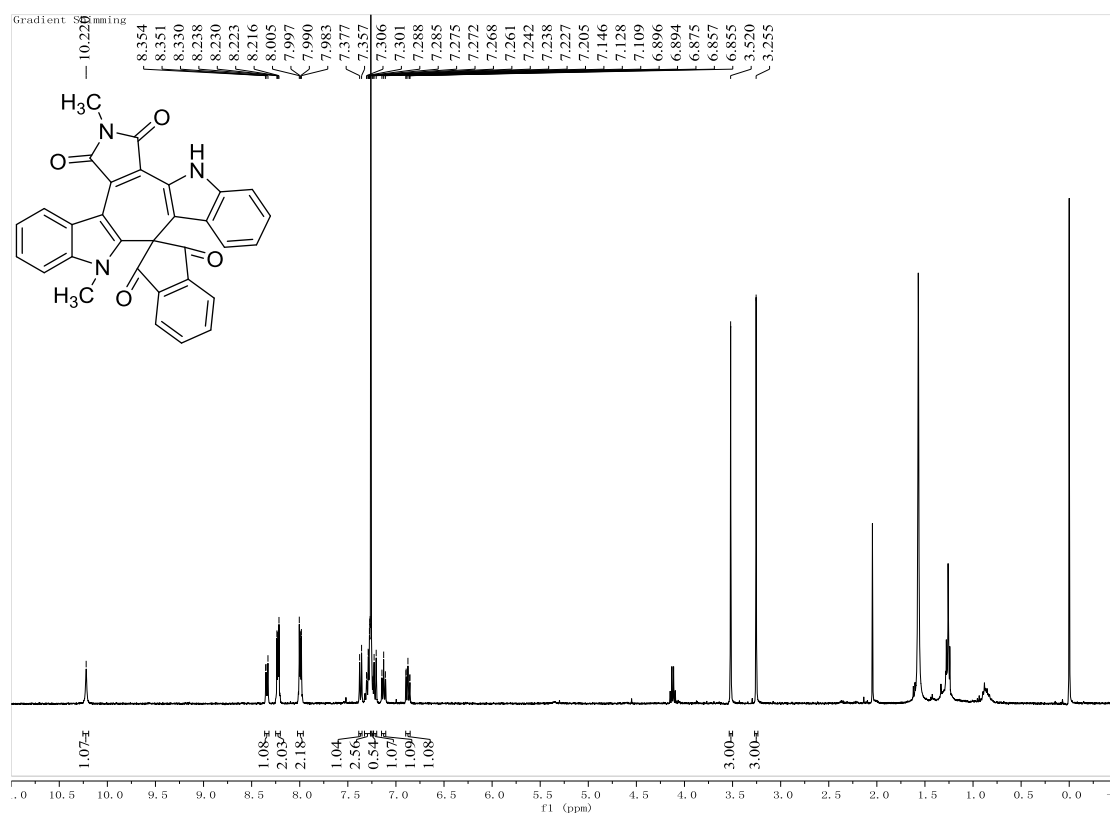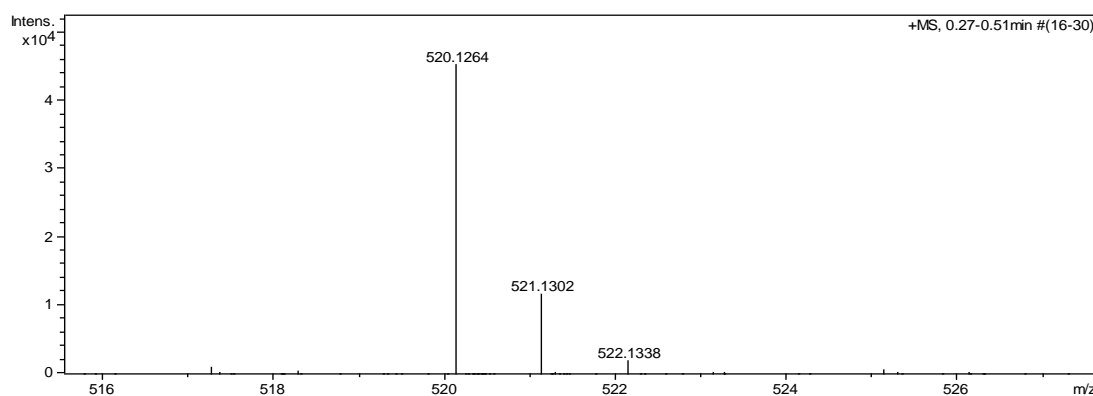

**3a'-(1-methyl-1H-indol-3-yl)-2'-phenyl-3a',9a'-dihydrospiro[indene-2,9'-**

**pyrrolo[3',4':4,5]cyclopenta[1,2-b]indole]-1,1',3,3'(2'H,4'H)-tetraone (8b):** petroleum ether and methylene dichloride (V/V = 4:1) as the eluent, yellow solid, 438 mg, yellow solid, 78%, m.p. 218-221 °C; <sup>1</sup>H NMR (400 MHz, *d*<sub>6</sub>-DMSO) δ: 11.98 (s, 1H, NH), 8.27-8.22 (m, 4H, ArH), 7.64-7.60 (m, 2H, ArH), 7.53 (t, *J* = 8.0 Hz, 5H, ArH), 7.36 (t, *J* = 6.8 Hz, 2H, ArH), 7.23 (t, *J* = 7.6 Hz, 1H, ArH), 7.09 (t, *J* = 7.6 Hz, 1H, ArH), 7.02 (t, *J* = 7.6 Hz, 1H, ArH), 6.85 (t, *J* = 7.6 Hz, 1H, ArH), 6.36 (d, *J* = 8.0 Hz, 1H, ArH), 4.61 (s, 1H, CH), 3.87 (s, 3H, CH<sub>3</sub>); <sup>13</sup>C NMR (100 MHz, *d*<sub>6</sub>-DMSO) δ: 199.6, 199.5, 175.2, 174.3, 142.1, 142.0, 141.2, 141.1, 138.3, 138.2, 137.8, 132.4, 129.7, 129.5, 128.9, 127.5, 125.5, 124.6, 124.4, 122.6, 122.3, 121.1, 120.5, 120.0, 119.3, 117.2, 116.6, 113.6, 110.8, 110.5, 64.0, 63.4, 56.7, 32.9; IR (KBr) ν: 3055, 2931, 2825, 2676, 1934, 1711, 1611, 1551, 1456, 1432, 1388, 1184, 1348, 1250, 1132, 1041, 972, 927, 843, 756 cm<sup>-1</sup>; MS (*m/z*): HRMS (ESI-TOF) Calcd. for C<sub>36</sub>H<sub>23</sub>NaN<sub>3</sub>O<sub>4</sub> ([M+Na]<sup>+</sup>): 584.1581, Found: 584.1571.

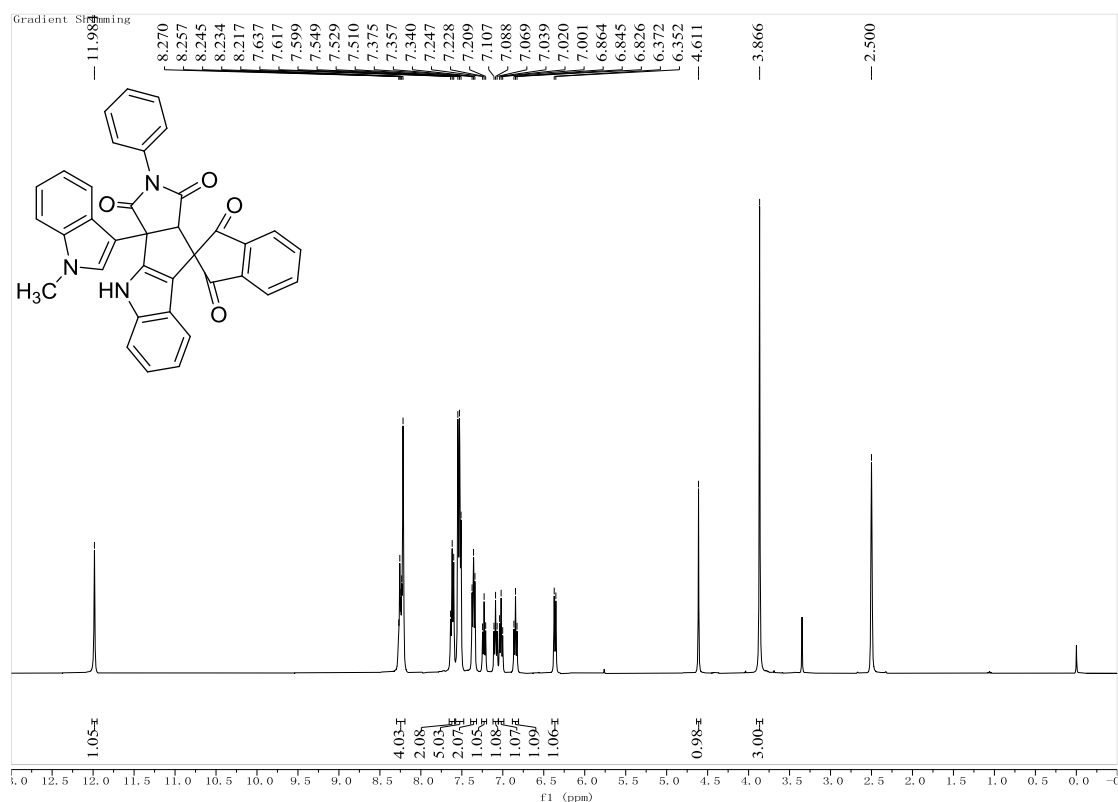

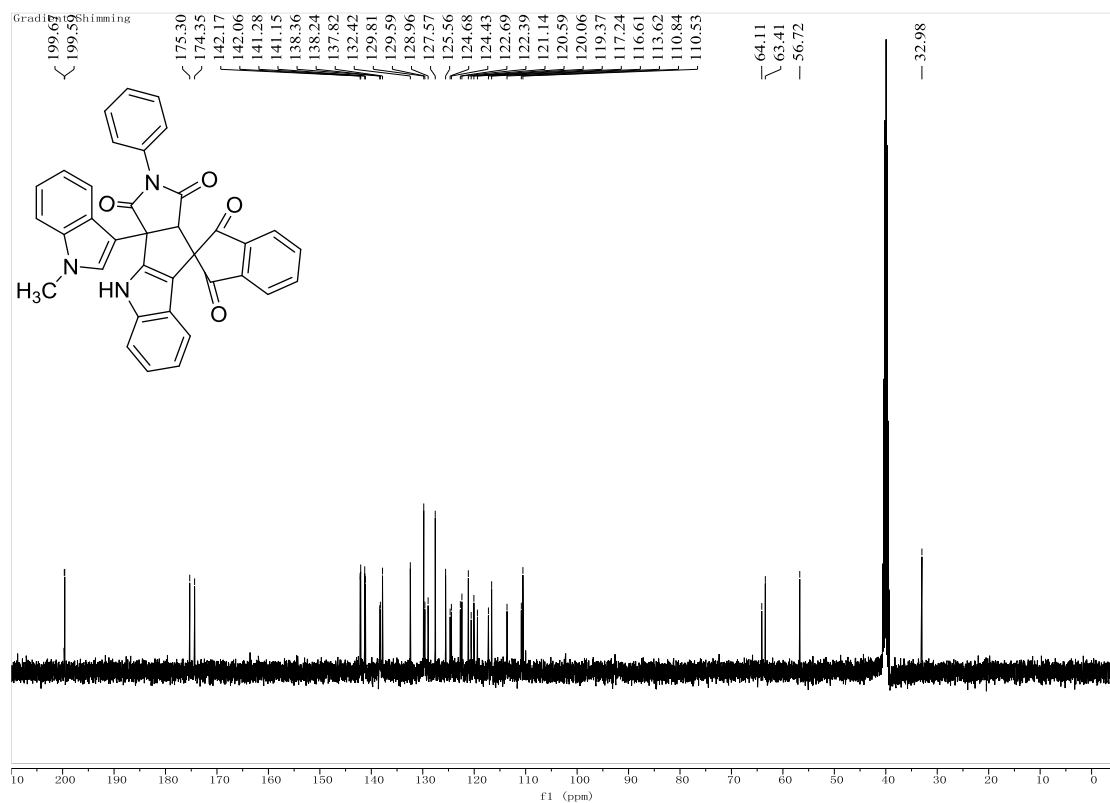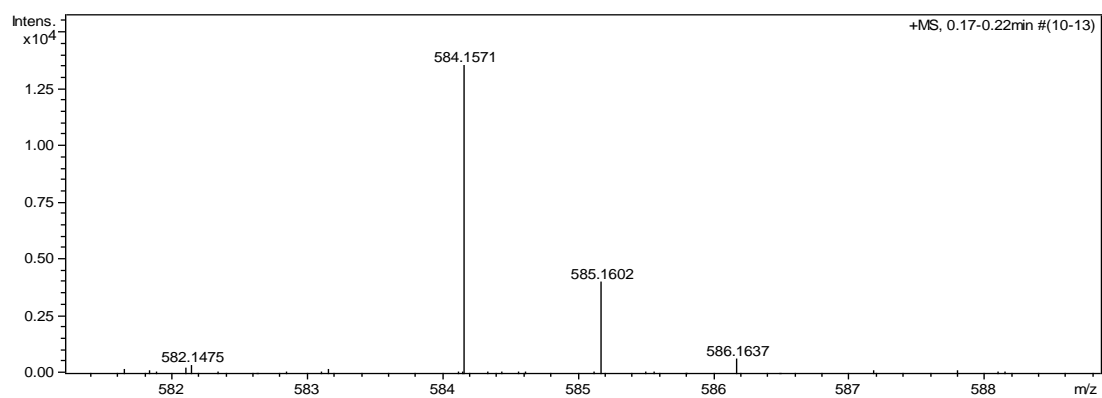

**8'-methyl-2'-phenyl-8',14'-dihydro-1'H-spiro[indene-2,9'-pyrrolo[3',4':6,7]cyclohepta[1,2-*b*:4,5-*b'*]diindole]-1,1',3,3'(2'H)-tetraone (9b)**: petroleum ether and methylene dichloride (V/V = 4:1) as the eluent, red solid, 95 mg, red solid, 17%, m.p. 235-238 °C; <sup>1</sup>H NMR (400 MHz, CDCl<sub>3</sub>) δ: 10.31 (s, 1H, NH), 8.35 (d, *J* = 8.0 Hz, 1H, ArH), 8.25 (dd, *J*<sub>1</sub> = 5.2 Hz, *J*<sub>2</sub> = 3.2 Hz, 2H, ArH), 8.01 (dd, *J*<sub>1</sub> = 5.6 Hz, *J*<sub>2</sub> = 3.2 Hz, 2H, ArH), 7.62-7.55 (m, 4H, ArH), 7.45-7.42 (m, 1H, ArH), 7.37 (d, *J* = 8.4 Hz, 1H, ArH), 7.33-7.23 (m, 4H, ArH), 7.15 (d, *J* = 7.6 Hz, 1H, ArH), 6.90 (d, *J* = 8.0 Hz, 1H, ArH), 3.55 (s, 3H, CH<sub>3</sub>); IR (KBr) ν: 3055, 2941, 2845, 2348, 1745, 1685, 1622, 1535, 1478, 1384, 1367, 1250, 1325, 1178, 1088, 1056, 1022, 989, 845, 775, 745 cm<sup>-1</sup>; MS (*m/z*): HRMS (ESI-TOF) Calcd. for C<sub>36</sub>H<sub>21</sub>NaN<sub>3</sub>O<sub>4</sub> ([M+Na]<sup>+</sup>): 5582.1424, Found: 582.1416.

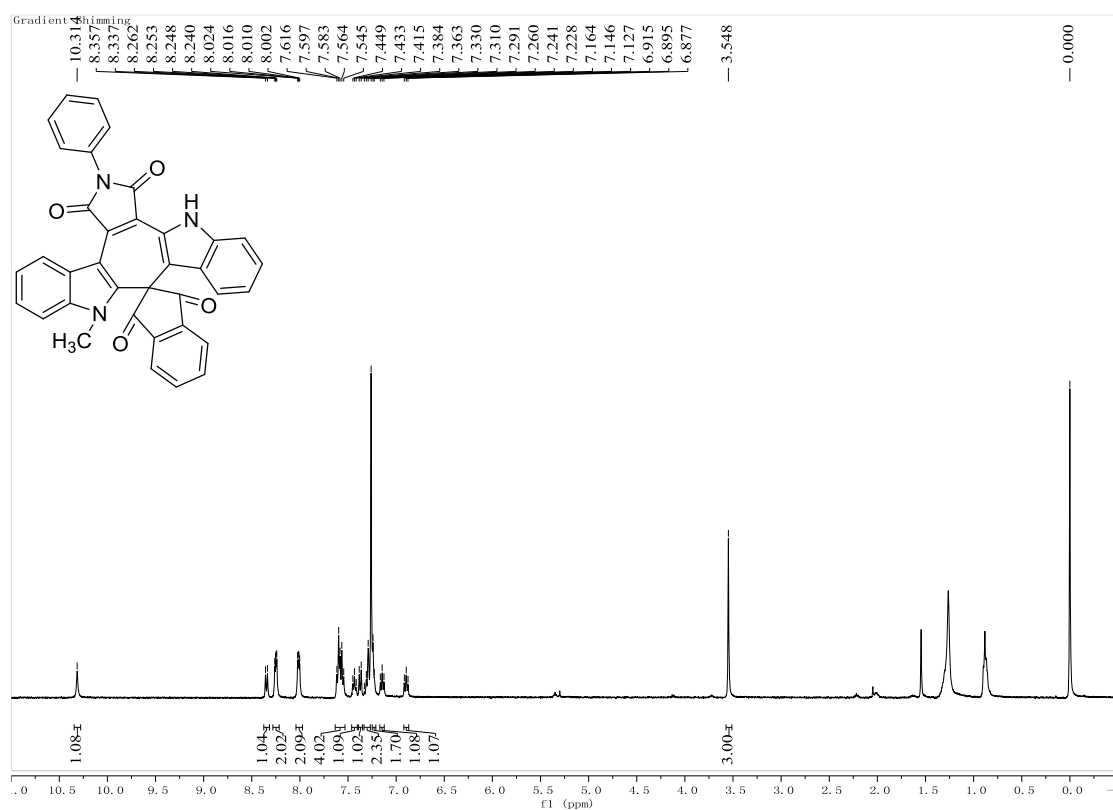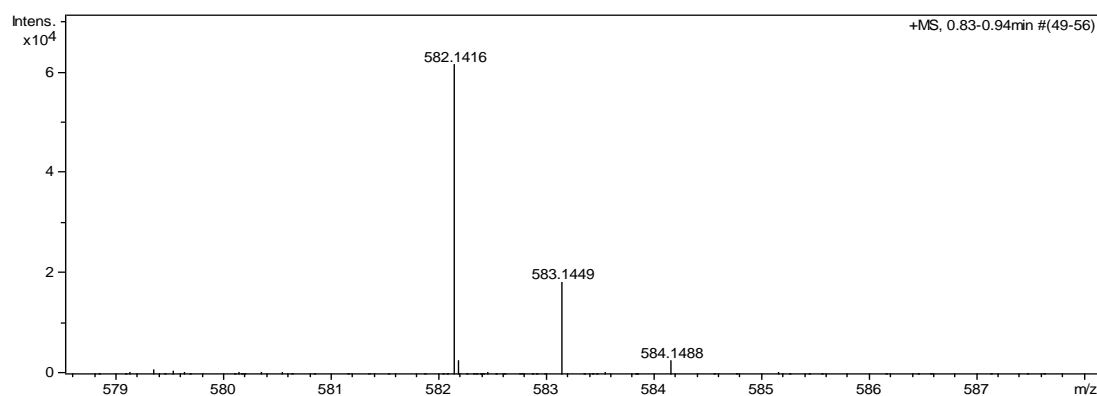

**2'-benzyl-3a'-(1-methyl-1*H*-indol-3-yl)-3a',9a'-dihydrospiro[indene-2,9'-**

**pyrrolo[3',4':4,5]cyclopenta[1,2-*b*]indole]-1,1',3,3'(2'*H*,4'*H*)-tetraone (8c):** petroleum ether and methylene dichloride (V/V = 4:1) as the eluent, yellow solid, 431 mg, yellow solid, 75%, m.p. 222-224 °C; <sup>1</sup>H NMR (400 MHz, *d*<sub>6</sub>-DMSO) δ: 11.98 (s, 1H, NH), 8.19 (s, 4H, ArH), 7.48-7.42 (m, 3H, ArH), 7.39-7.31 (m, 4H, ArH), 7.23 (s, 1H, ArH), 7.16 (t, *J* = 7.6 Hz, 1H, ArH), 7.09 (t, *J* = 7.6 Hz, 1H, ArH), 6.96 (t, *J* = 8.0 Hz, 1H, ArH), 6.85-6.78 (m, 2H, ArH), 6.38 (d, *J* = 7.6 Hz, 1H, ArH), 4.88 (d, *J* = 14.4 Hz, 1H, CH), 4.73 (d, *J* = 14.4 Hz, 1H, CH), 4.45 (s, 1H, CH), 3.78 (s, 3H, CH<sub>3</sub>); <sup>13</sup>C NMR (100 MHz, *d*<sub>6</sub>-DMSO) δ: 199.6, 199.2, 175.8, 174.8, 142.1, 142.0, 141.5, 140.8, 138.0, 137.6, 135.7, 129.0, 128.9, 128.8, 128.2, 125.1, 124.5, 124.2, 122.6, 122.2, 121.2, 120.4, 119.7, 119.1, 117.2, 116.6, 113.5, 111.2, 110.7, 109.9, 64.2, 62.7, 56.5, 43.1, 32.9; IR (KBr) ν: 3055, 2931, 2831, 2678, 1931, 1711, 1615, 1550, 1468, 1431, 1386, 1184, 1343, 1250, 1132, 1048, 979, 931, 854, 756 cm<sup>-1</sup>; MS (*m/z*): HRMS (ESI-TOF) Calcd. for C<sub>37</sub>H<sub>25</sub>NaN<sub>3</sub>O<sub>4</sub> ([M+Na]<sup>+</sup>): 598.1737, Found: 598.1727.

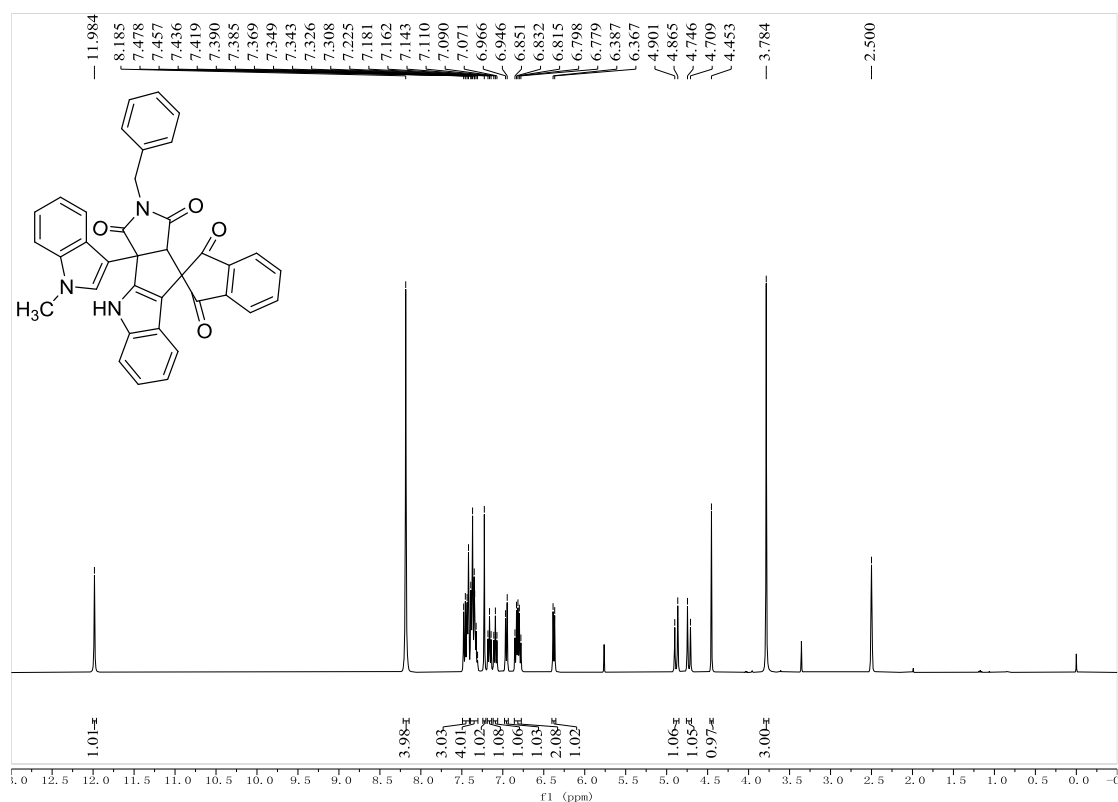

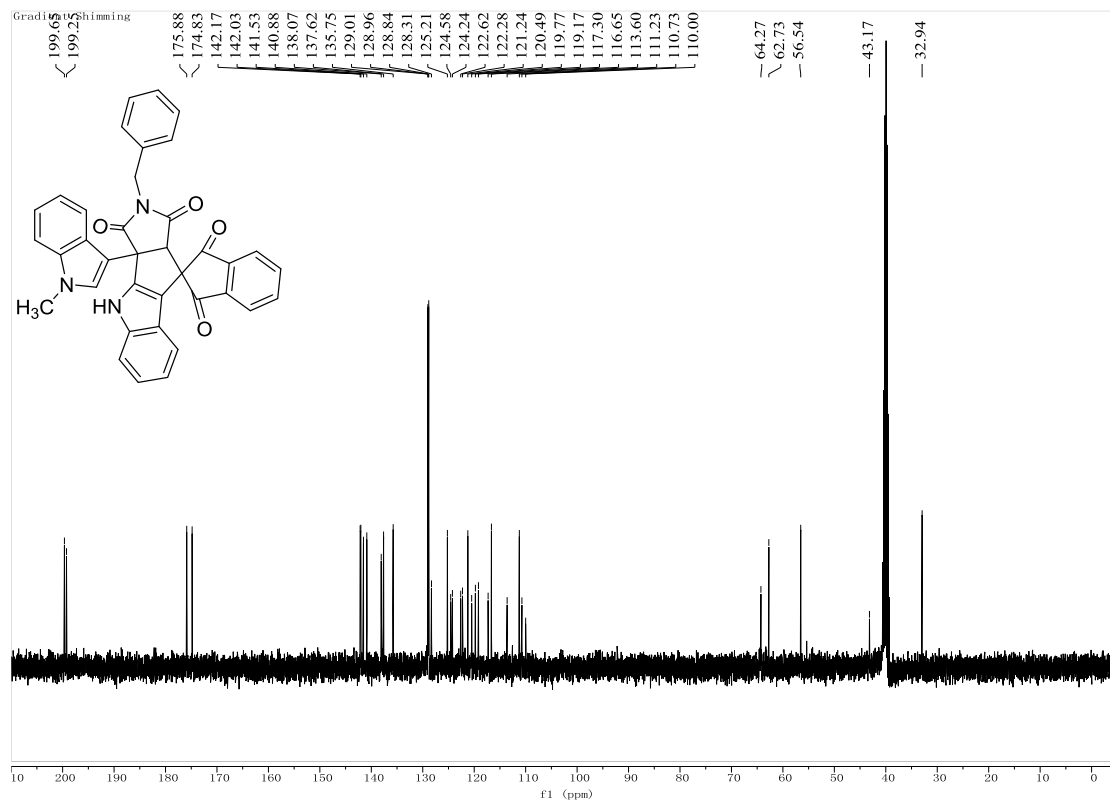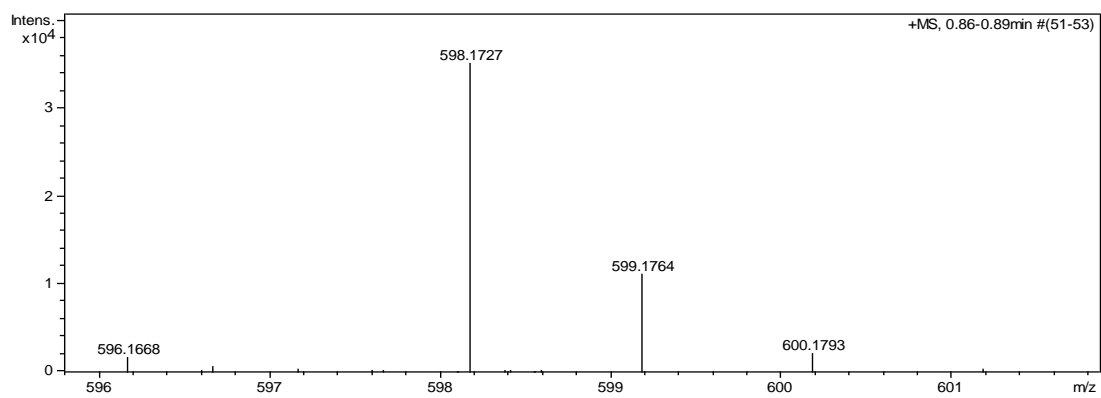

**2'-benzyl-8'-methyl-8',14'-dihydro-1'*H*-spiro[indene-2,9'-pyrrolo[3',4':6,7]cyclohepta[1,2-*b*:4,5-*b'*]diindole]-1,1',3,3'(2'*H*)-tetraone (9c)**: petroleum ether and methylene dichloride (V/V = 4:1) as the eluent, red solid, 120 mg, red solid, 21%, m.p. 240-242 °C; <sup>1</sup>H NMR (400 MHz, CDCl<sub>3</sub>) δ: 10.22 (s, 1H, NH), 8.34-8.32 (m, 1H, ArH), 8.22 (dd, *J*<sub>1</sub> = 6.4 Hz, *J*<sub>2</sub> = 2.8 Hz, 2H, ArH), 7.99 (dd, *J*<sub>1</sub> = 6.4 Hz, *J*<sub>2</sub> = 2.8 Hz, 2H, ArH), 7.54 (d, *J* = 7.2 Hz, 2H, ArH), 7.40 (t, *J* = 7.6 Hz, 2H, ArH), 7.34-7.24 (m, 5H, ArH), 7.20 (d, *J* = 8.4 Hz, 1H, ArH), 7.12 (t, *J* = 8.0 Hz, 1H, ArH), 6.86 (d, *J* = 8.0 Hz, 1H, ArH), 4.92 (s, 2H, CH), 3.51 (s, 3H, CH<sub>3</sub>); IR (KBr) ν: 3045, 2941, 2838, 2348, 1748, 1686, 1622, 1548, 1478, 1389, 1378, 1251, 1323, 1178, 1088, 1065, 1021, 989, 851, 788, 745 cm<sup>-1</sup>; MS (*m/z*): HRMS (ESI-TOF) Calcd. for C<sub>37</sub>H<sub>23</sub>NaN<sub>3</sub>O<sub>4</sub> ([M+Na]<sup>+</sup>): 596.1581, Found: 596.1569.

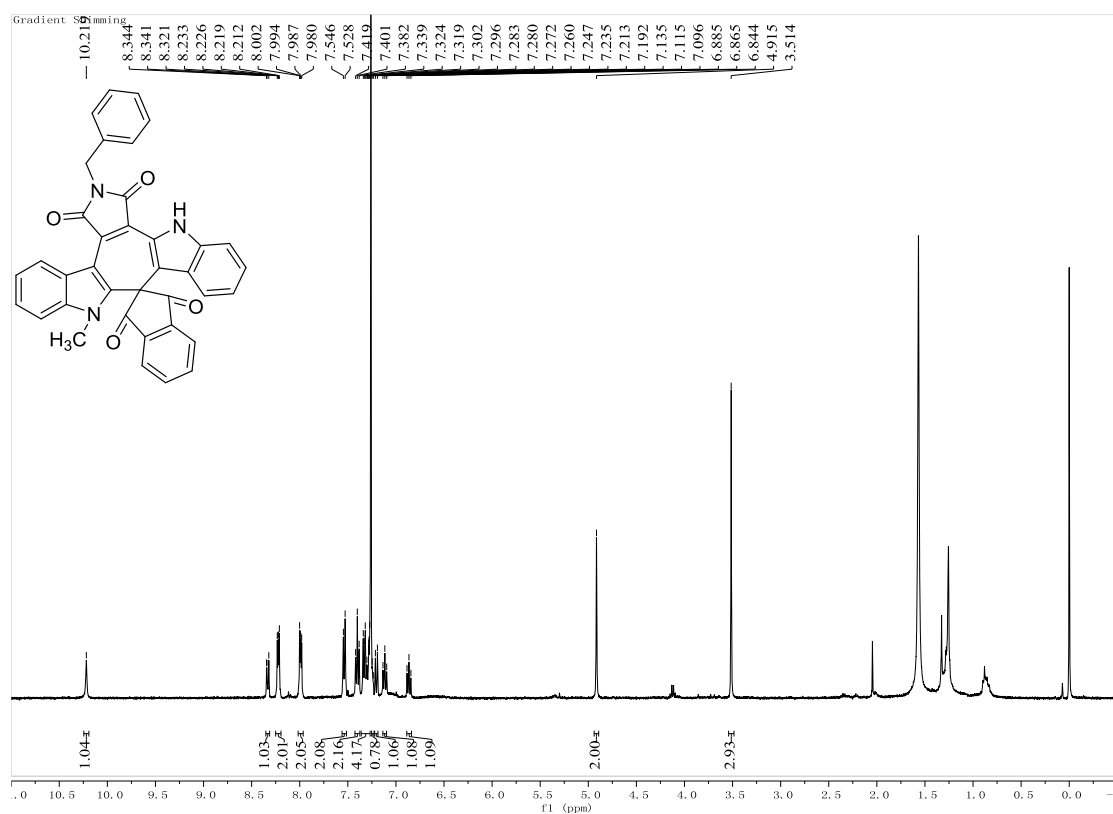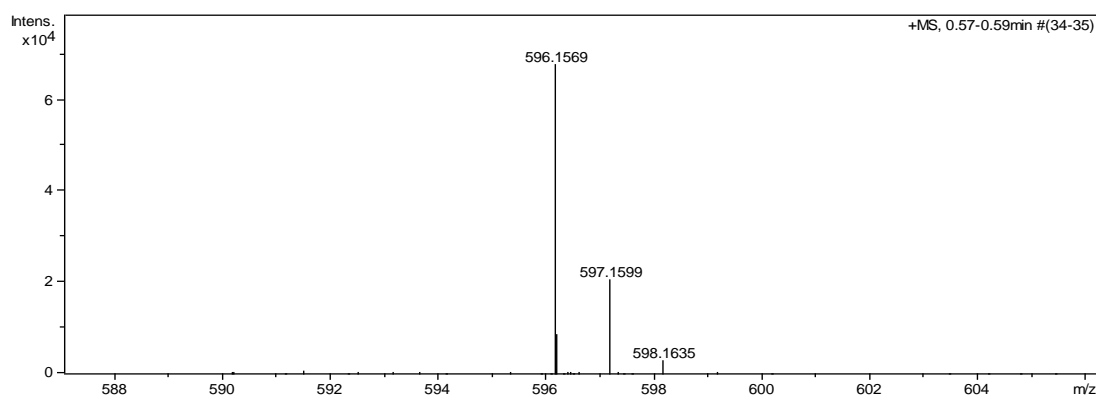



**2',4'-dimethyl-3a'-(1-methyl-1*H*-indol-3-yl)-3a',9a'-dihydrospiro[indene-2,9']-**

**pyrrolo[3',4':4,5]cyclopenta[1,2-*b*]indole]-1,1',3,3'(2'*H*,4'*H*)-tetraone (8d):** petroleum ether and methylene dichloride (V/V = 4:1) as the eluent, yellow solid, 482 mg, yellow solid, 94%, m.p. 224-226 °C; <sup>1</sup>H NMR (400 MHz, *d*<sub>6</sub>-DMSO) δ: 8.21-8.14 (m, 4H, ArH), 7.48 (dd, *J*<sub>1</sub> = 13.2 Hz, *J*<sub>2</sub> = 8.4 Hz, 2H, ArH), 7.40 (s, 1H, ArH), 7.21-7.14 (m, 2H, ArH), 7.08 (d, *J* = 8.0 Hz, 1H, ArH), 6.94 (t, *J* = 7.2 Hz, 1H, ArH), 6.89 (t, *J* = 7.2 Hz, 1H, ArH), 6.40 (d, *J* = 8.0 Hz, 1H, ArH), 4.35 (s, 1H, CH), 3.82 (s, 3H, CH<sub>3</sub>), 3.60 (s, 3H, CH<sub>3</sub>), 3.12 (s, 3H, CH<sub>3</sub>); <sup>13</sup>C NMR (100 MHz, *d*<sub>6</sub>-DMSO) δ: 199.5, 199.3, 176.2, 174.7, 142.7, 142.2, 141.3, 140.9, 138.1, 138.0, 137.7, 128.8, 128.7, 125.3, 124.5, 124.2, 122.7, 122.2, 120.9, 120.8, 119.9, 119.1, 117.4, 116.2, 111.6, 110.7, 110.4, 65.1, 62.3, 56.5, 32.9, 31.0, 25.8; IR (KBr) ν: 3048, 2924, 2819, 2642, 1931, 1711, 1611, 1551, 1478, 1431, 1389, 1179, 1350, 1250, 1132, 1051, 978, 924, 855, 756 cm<sup>-1</sup>; MS (*m/z*): HRMS (ESI-TOF) Calcd. for C<sub>32</sub>H<sub>23</sub>NaN<sub>3</sub>O<sub>4</sub> ([M+Na]<sup>+</sup>): 536.1581, Found: 536.1574.

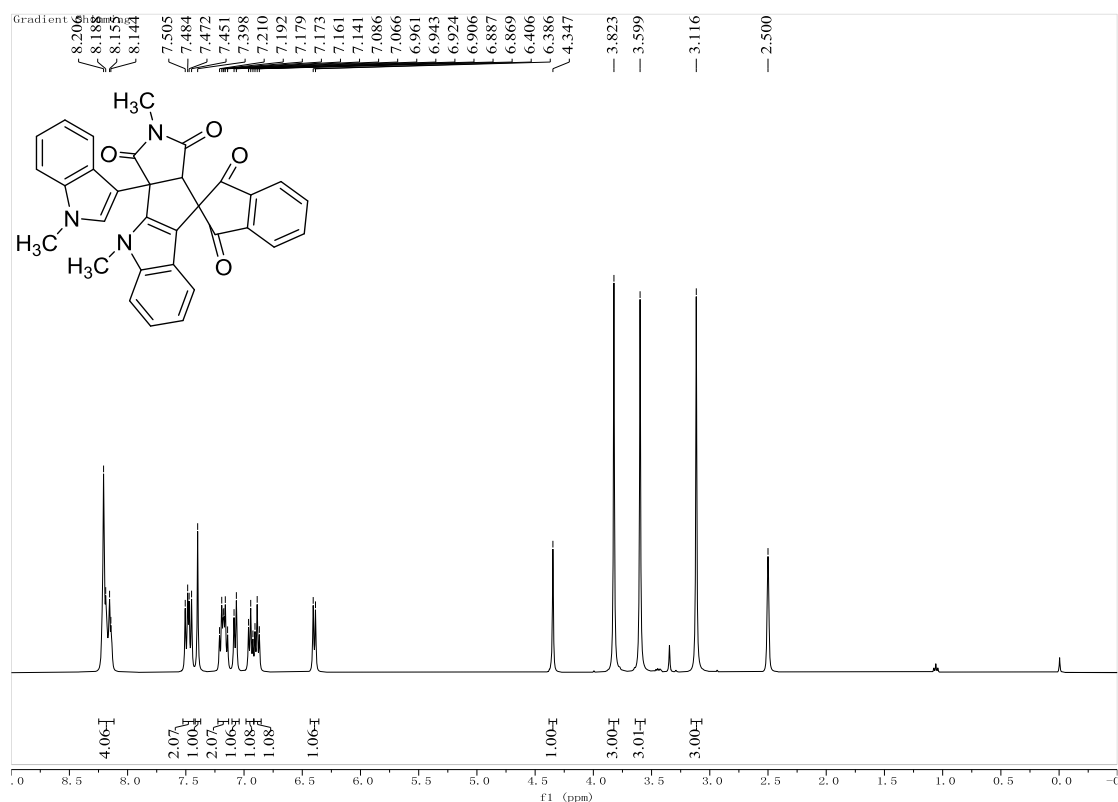

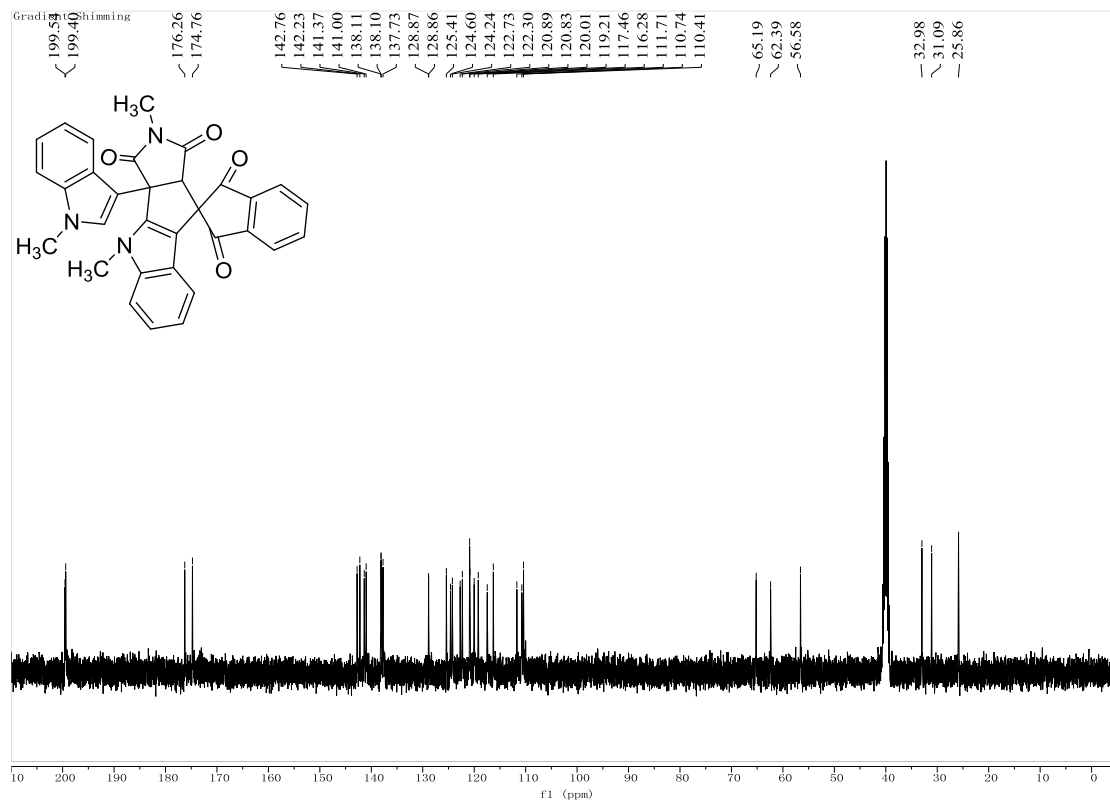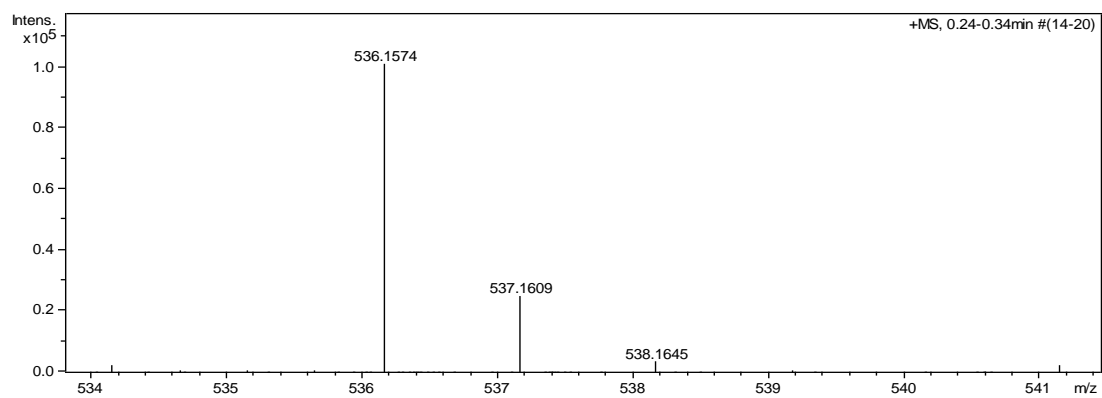

**4'-methyl-3a'-(1-methyl-1*H*-indol-3-yl)-2'-phenyl-3a',9a'-dihydrospiro[indene-2,9'-pyrrolo[3',4':4,5]cyclopenta[1,2-*b*]indole]-1,1',3,3'(2'*H*,4'*H*)-tetraone (8e):** petroleum ether and methylene dichloride (V/V = 4:1) as the eluent, yellow solid, 552 mg, yellow solid, 96%, m.p. 221-223 °C; <sup>1</sup>H NMR (400 MHz, *d*<sub>6</sub>-DMSO) δ: 8.26-8.21 (m, 4H, ArH), 7.64-7.52 (m, 7H, ArH), 7.47 (d, *J* = 8.4 Hz, 1H, ArH), 7.24-7.16 (m, 3H, ArH), 6.97 (t, *J* = 7.2 Hz, 1H, ArH), 6.91 (t, *J* = 7.2 Hz, 1H, ArH), 6.41 (t, *J* = 8.0 Hz, 1H, ArH), 4.55 (s, 1H, CH), 3.88 (s, 3H, CH<sub>3</sub>), 3.56 (s, 3H, CH<sub>3</sub>); <sup>13</sup>C NMR (100 MHz, *d*<sub>6</sub>-DMSO) δ: 199.6, 199.3, 175.4, 174.0, 142.4, 142.3, 141.2, 141.1, 138.3, 138.2, 137.8, 132.2, 129.7, 129.6, 128.7, 127.5, 125.4, 124.6, 124.4, 122.8, 122.3, 120.9, 120.7, 120.0, 119.2, 117.4, 116.4, 111.7, 110.8, 110.0, 64.7, 62.9, 56.6, 33.0, 30.9; IR (KBr) ν: 3045, 2934, 2821, 2669, 1939, 1714, 1611, 1545, 1469, 1431, 1394, 1175, 1342, 1245, 1133, 1051, 976, 931, 857, 756 cm<sup>-1</sup>; MS (*m/z*): HRMS (ESI-TOF) Calcd. for C<sub>37</sub>H<sub>25</sub>NaN<sub>3</sub>O<sub>4</sub> ([M+Na]<sup>+</sup>): 5498.1737, Found: 598.1729.

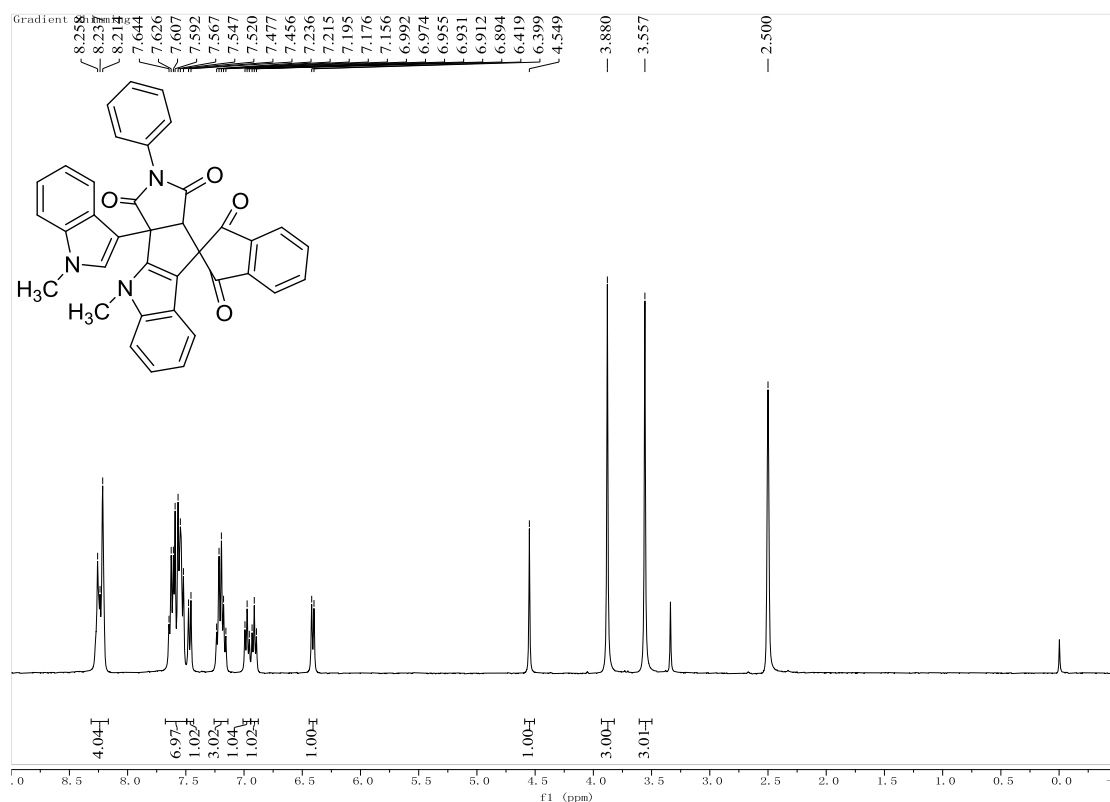

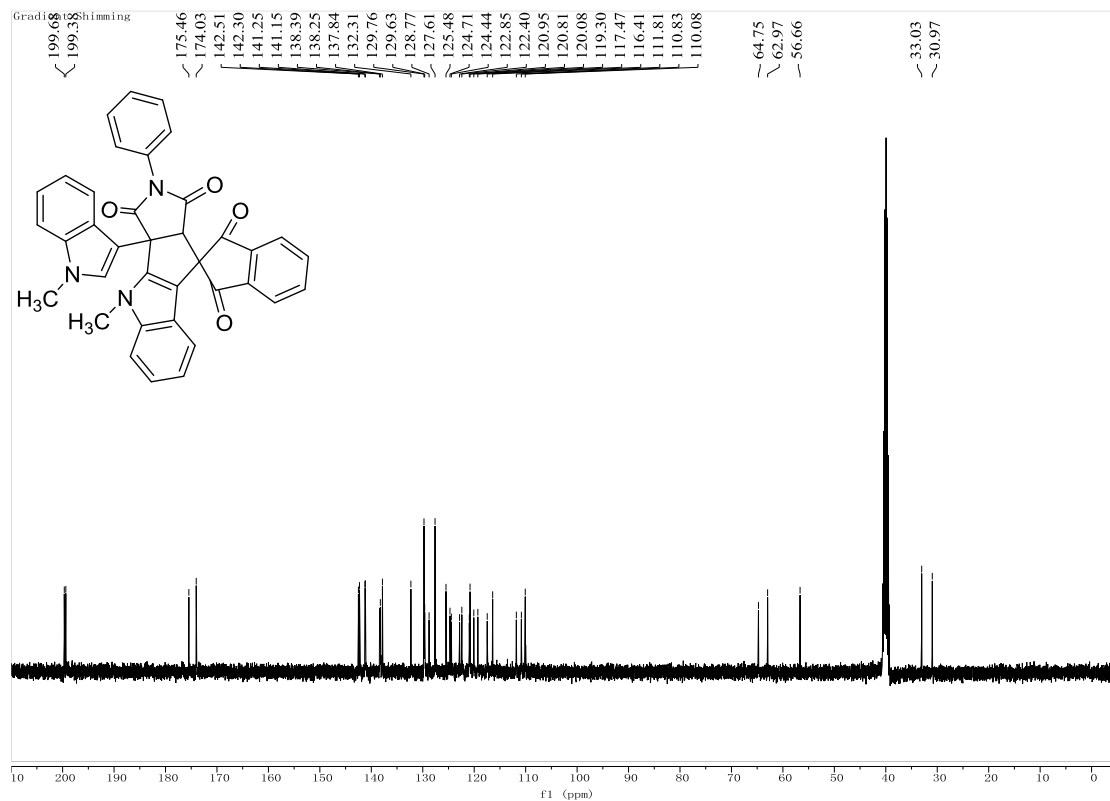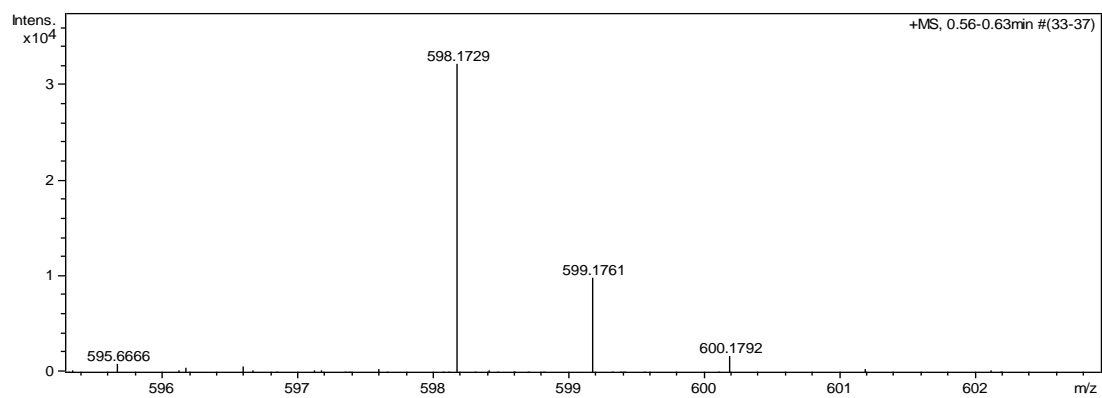

**2'-benzyl-4'-methyl-3a'-(1-methyl-1*H*-indol-3-yl)-3a',9a'-dihydrospiro[indene-2,9'-**

**pyrrolo[3',4':4,5]cyclopenta[1,2-*b*]indole]-1,1',3,3'(2'*H*,4'*H*)-tetraone (8f):** petroleum ether and methylene dichloride (V/V = 4:1) as the eluent, yellow solid, 560 mg, yellow solid, 95%, m.p. 226-228 °C; <sup>1</sup>H NMR (400 MHz, *d*<sub>6</sub>-DMSO) δ: 8.21-8.15 (m, 4H, ArH), 7.49-7.45 (m, 4H, ArH), 7.41-7.33 (m, 3H, ArH), 7.19-7.13 (m, 3H, ArH), 6.90 (t, *J* = 7.6 Hz, 1H, ArH), 6.82 (d, *J* = 8.0 Hz, 1H, ArH), 6.76 (d, *J* = 7.6 Hz, 1H, ArH), 6.42 (d, *J* = 8.0 Hz, 1H, ArH), 4.88 (d, *J* = 14.8 Hz, 1H, CH), 4.75 (d, *J* = 14.8 Hz, 1H, CH), 4.37 (s, 1H, CH), 3.78 (s, 3H, CH<sub>3</sub>), 3.65 (s, 3H, CH<sub>3</sub>); <sup>13</sup>C NMR (100 MHz, *d*<sub>6</sub>-DMSO) δ: 199.4, 199.2, 176.0, 174.4, 142.6, 142.3, 141.4, 140.8, 138.1, 138.0, 137.6, 135.6, 129.0, 128.9, 128.7, 128.3, 125.1, 124.5, 124.2, 122.7, 122.2, 120.9, 120.8, 119.8, 119.0, 117.4, 116.4, 111.7, 110.8, 110.7, 64.9, 62.2, 56.5, 43.2, 32.9, 31.3; IR (KBr) ν: 3052, 2934, 2825, 2668, 1934, 1711, 1614, 1545, 1475, 1431, 1389, 1175, 1345, 1245, 1135, 1051, 978, 933, 852, 756 cm<sup>-1</sup>; MS (*m/z*): HRMS (ESI-TOF) Calcd. for C<sub>38</sub>H<sub>27</sub>NaN<sub>3</sub>O<sub>4</sub> ([M+Na]<sup>+</sup>): 612.1894, Found: 612.1885.

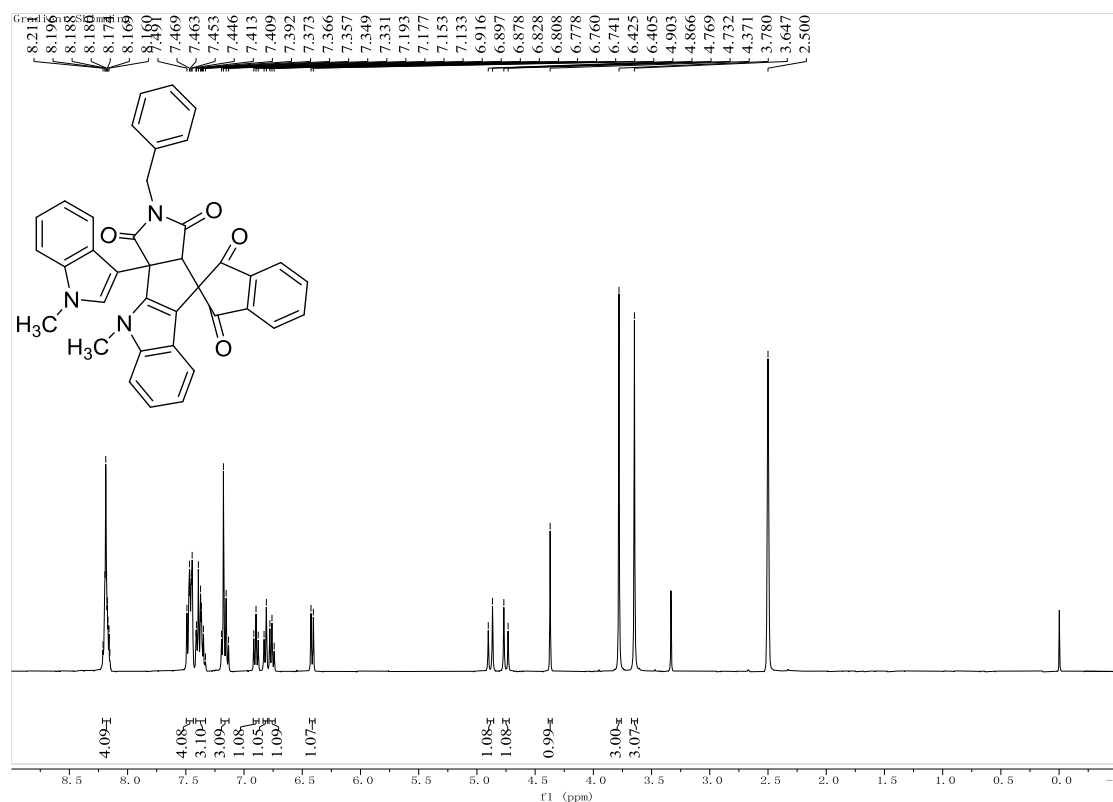

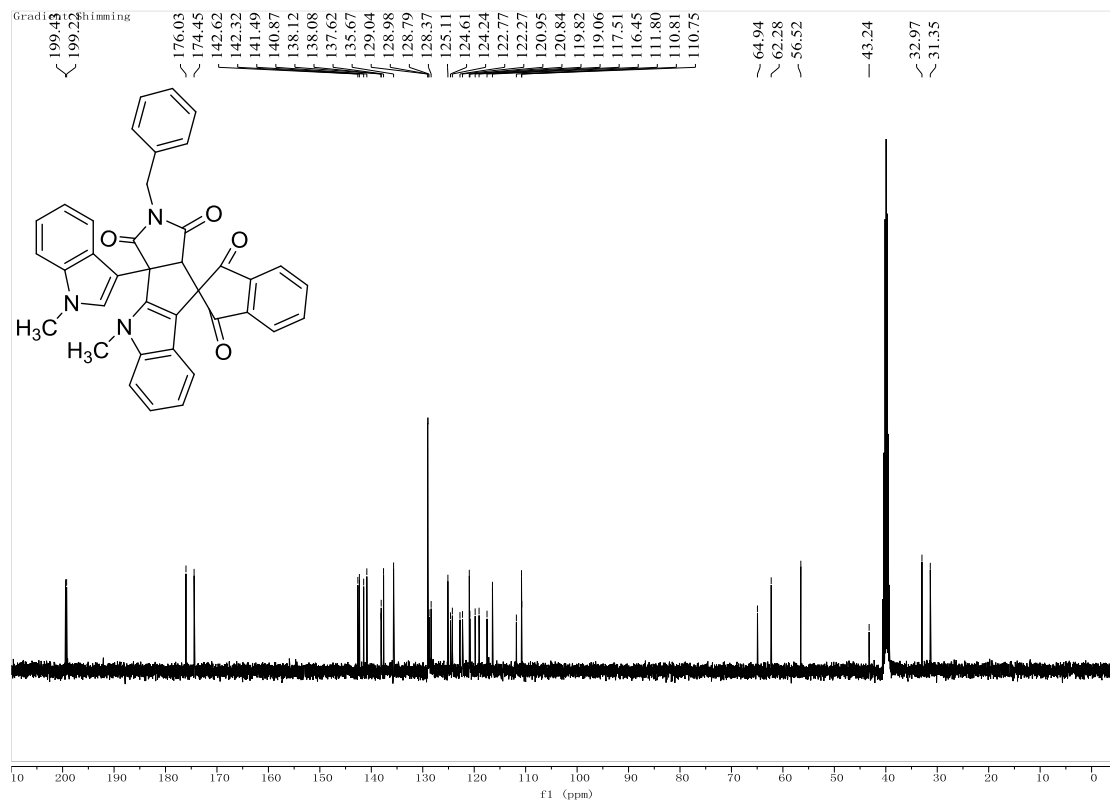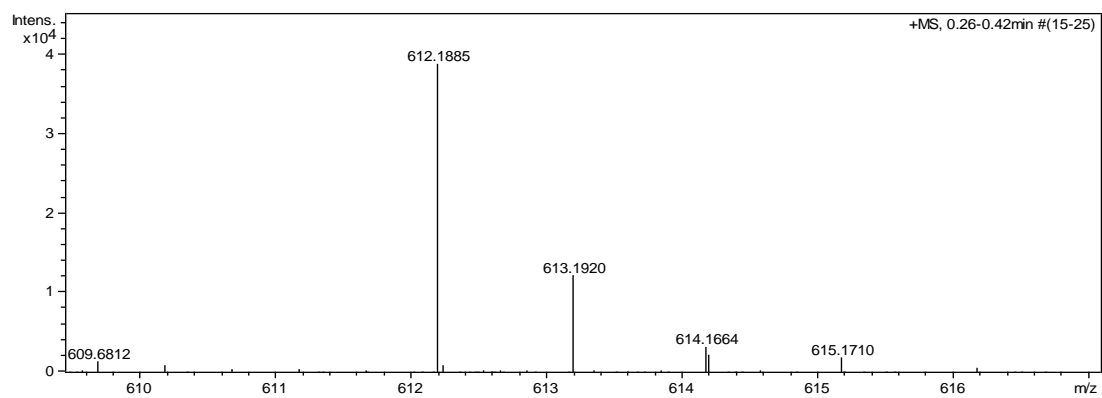

Supplement: d3nj00013c1.pdf [file d3nj00013c1.pdf]
